# Supplementary material for: Direct conversion of phenols into primary anilines with hydrazine catalyzed by palladium
Source: Royal Society of Chemistry journal article supplement (doi:10.1039/c9sc00595a), 2019-01-01

## Supporting Information

### **Direct Conversion of Phenols into Primary Anilines with Hydrazine Catalyzed by Palladium**

Zihang Qiu,<sup>a</sup> Leiyang Lv,<sup>a</sup> Jianbin Li,<sup>a</sup> Chen-Chen Li<sup>a</sup> and Chao-Jun Li<sup>\*a</sup>

## Contents

|                                                                      |    |
|----------------------------------------------------------------------|----|
| <b>I. General Experimental Information</b> .....                     | 3  |
| <b>II. Experimental Procedure</b> .....                              | 4  |
| <b>III. Optimization of the Reaction Conditions</b> .....            | 5  |
| <b>IV. Synthesis of Starting Materials</b> .....                     | 10 |
| <b>V. Spectroscopic Data of Synthesized Starting Materials</b> ..... | 11 |
| <b>VI. Spectroscopic Data of Products</b> .....                      | 15 |
| <b>VII. References</b> .....                                         | 29 |
| <b>VIII. NMR Spectra of Products</b> .....                           | 30 |

## I. General Experimental Information

All reactions were carried out under an atmosphere of argon, unless otherwise stated. All reported reaction temperatures corresponded to oil bath temperatures. Solvents and reagents were purchased from Sigma-Aldrich chemical company and Fisher Scientific and were used without further purification unless otherwise specified. 1,4-Dioxane and toluene were purified by the *Pure Solvent MD-7* purification system (Innovative Technology). Pentane was distilled under atmosphere pressure prior to use. 4 Å molecular sieves were purchased from Sigma-Aldrich chemical company and were freshly activated in the oven for 12 h at 380 °C prior to use. HCO<sub>2</sub>Na (sodium formate) was purchased from Merck chemical company. Product purifications were performed either with preparative chromatography on a Biotage Isolera One automated chromatography system on silica gel or with preparative analytical thin-layer chromatography (TLC) using E. Merck silica gel 60 F<sub>254</sub> pre-coated plates (0.25 mm).

NMR Spectroscopy: Nuclear magnetic resonance (<sup>1</sup>H, <sup>13</sup>C, <sup>19</sup>F) spectra were recorded on a Bruker AV500 equipped with a 60-position Sample Xpress sample changer (<sup>1</sup>H, 500 MHz; <sup>13</sup>C, 125 MHz). Chemical shifts are expressed in parts per million (ppm) units downfield from TMS, with the solvent residue peak as the chemical shift standard (CDCl<sub>3</sub>: δ 7.26 ppm in <sup>1</sup>H NMR, δ 77.16 ppm in <sup>13</sup>C NMR; DMSO-d<sub>6</sub> δ 2.50 ppm in <sup>1</sup>H NMR, δ 39.52 ppm in <sup>13</sup>C NMR; acetone-d<sub>6</sub> δ 2.04 ppm in <sup>1</sup>H NMR, δ 206.3 ppm in <sup>13</sup>C NMR). Data are reported as following: chemical shift, multiplicity (s = singlet, d = doublet, dd = doublet of doublets, t = triplet, td = triplet of doublets, q = quartet, quint = quintet, sext = sextet, sept = septet, m = multiplet, br = broad singlet), coupling constants *J* (Hz), and integration.

Mass Spectrometry: EI-MS was obtained from the Agilent GC-MS system. High Resolution Mass (HRMS) spectra was performed by the McGill Chemistry Department Mass Spectrometry Facility and was recorded using electrospray ionization (ESI+) and/or atmospheric pressure chemical ionization APCI(+/-), performed either on "Exactive Plus Orbitrap" a ThermoScientific high resolution accurate mass (HR/AM) FT mass spectrometer, or a Bruker Daltonics Maxis Impact quadrupole-time of flight (QTOF) mass spectrometer. Protonated molecular ions (M+H)<sup>+</sup>, (M-H)<sup>-</sup> or sodium adducts (M+Na)<sup>+</sup>, were used for empirical formula confirmation.

**Caution:** *hydrazine monohydrate is potentially hazardous, and pressure can be built up at high temperature. Therefore appropriate personal protections should be performed running this transformation.*

## II. Experimental Procedure

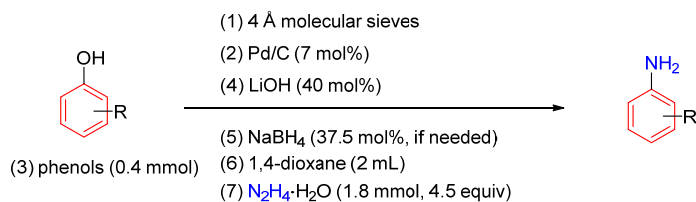

General procedures: Freshly activated 4 Å molecular sieves (100 mg 4 Å molecular sieves per 0.3 mmol N<sub>2</sub>H<sub>4</sub>·H<sub>2</sub>O) was added into a flame-dried 15 mL Synthware™ cylindrical heavy wall pressure vessel, charged with a magnetic stir bar; followed by the addition of Pd/C (5 wt%, 7 mol%, 59.6 mg). The vessel was then vacuumed, stirred and heated in an oil-bath at 140 °C for 1 h to pre-activate the Pd/C. Next, phenols (0.4 mmol, 1 equiv) and LiOH (0.16 mmol, 40 mol%, 3.8 mg) (NaBH<sub>4</sub> (0.15 mmol, 37.5 mol%, 5.7 mg), if needed) were added into the vessel under argon protection. After three cycles of evacuation/backfilling sequence with argon, 1,4-dioxane (2.0 mL) and N<sub>2</sub>H<sub>4</sub>·H<sub>2</sub>O (1.8 mmol, 4.5 equiv, 87.3 μL) were added. Then the vessel was sealed, allowed to stir at room temperature for 20 mins and then stirred at 170 °C in the pre-heated oil bath at 750 rpm for 16 h. After completion, the reaction mixture was diluted with EtOAc or MeOH and filtered through a pad of celite. The filtrate was then concentrated *in vacuo*, and the resulting residue was purified by column chromatography on silica gel or preparative TLC (EtOAc/hexanes, DCM/MeOH, etc.) to afford the corresponding products.

### III. Optimization of the Reaction Conditions

**Table S1.** Evaluation of molecular sieves<sup>[a]</sup>

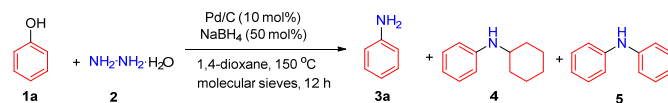

| entry | molecular sieve type | molecular sieve amount (mg) | conv. (%) | yield (%) |    |   |
|-------|----------------------|-----------------------------|-----------|-----------|----|---|
|       |                      |                             |           | 3a        | 4  | 5 |
| 1     | -                    | -                           | 100       | 10        | 46 | 1 |
| 2     | 4 Å                  | 50                          | 100       | 48        | 25 | 3 |
| 3     | 4 Å                  | 75                          | 100       | 46        | 26 | 5 |
| 4     | 4 Å                  | 100                         | 100       | 58        | 8  | 2 |
| 5     | 4 Å                  | 150                         | 100       | 57        | 11 | 3 |
| 6     | 4 Å                  | 300                         | 96        | 53        | 10 | 2 |
| 7     | 3 Å                  | 100                         | 100       | 44        | 22 | 4 |
| 8     | 5 Å                  | 100                         | 58        | 24        | 4  | 6 |

[a] Reaction conditions: phenol (0.2 mmol, 1 equiv), N<sub>2</sub>H<sub>4</sub>·H<sub>2</sub>O (0.3 mmol, 1.5 equiv), 10 mol% of 5 wt% Pd/C with NaBH<sub>4</sub> (50 mol%) in 1,4-dioxane (1 mL) were stirred under argon for 12 h; Starting material conversion and NMR yields were given with 1,3,5-trimethoxybenzene as the internal standard, and yields were calculated based on phenol.

**Table S2.** Evaluation of solvents<sup>[a]</sup>

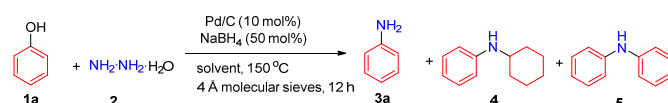

| entry | various solvents (1 mL)                                  | conv. (%) | yield (%) |    |    |
|-------|----------------------------------------------------------|-----------|-----------|----|----|
|       |                                                          |           | 3a        | 4  | 5  |
| 1     | 1,4-dioxane                                              | 100       | 58        | 8  | 2  |
| 2     | heptane                                                  | 99        | 35        | 15 | 11 |
| 3     | <i>m</i> -xylene                                         | 78        | 24        | 6  | 1< |
| 4     | toluene                                                  | 81        | 43        | 8  | 1< |
| 5     | trihexyltetradecylphosphonium dicyanamide (ionic liquid) | -         | -         | -  | -  |
| 6     | diglyme                                                  | -         | -         | -  | -  |
| 7     | NMP                                                      | 70        | 15        | 1< | 1< |
| 8     | CPME                                                     | 100       | 30        | 30 | 10 |

[a] Reaction conditions: phenol (0.2 mmol, 1 equiv), N<sub>2</sub>H<sub>4</sub>·H<sub>2</sub>O (0.3 mmol, 1.5 equiv), 10 mol% of 5 wt% Pd/C, NaBH<sub>4</sub> (50 mol%) with 100 mg 4 Å molecular sieve in various solvents above (1 mL) were stirred under argon for 12 h; Starting material conversion and NMR yields were given with 1,3,5-trimethoxybenzene as the internal standard, and yields were calculated based on phenol.

**Table S3.** Evaluation of catalysts<sup>[a]</sup>

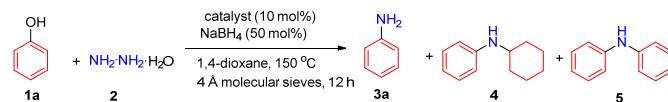

| entry | catalyst (10 mol%)                        | conv. (%) | yield (%) |    |    |
|-------|-------------------------------------------|-----------|-----------|----|----|
|       |                                           |           | 3a        | 4  | 5  |
| 1     | Pd/C (5 wt%)                              | 100       | 58        | 8  | 2  |
| 2     | Pd/C (10 wt%)                             | 100       | 52        | 22 | 5  |
| 3     | Pd/Al <sub>2</sub> O <sub>3</sub> (5 wt%) | 100       | 42        | <1 | <1 |
| 4     | Ru/C (5 wt%)                              | -         | -         | -  | -  |

[a] Reaction conditions: phenol (0.2 mmol, 1 equiv), N<sub>2</sub>H<sub>4</sub>·H<sub>2</sub>O (0.3 mmol, 1.5 equiv), 10 mol% catalyst, NaBH<sub>4</sub> (50 mol%), 100 mg 4 Å molecular sieve with additives in 1,4-dioxane (1 mL) were stirred under argon for 12 h; Starting material conversion and NMR yields were given with 1,3,5-trimethoxybenzene as the internal standard, and yields were calculated based on phenol.

**Table S4.** Evaluation of acid additives<sup>[a]</sup>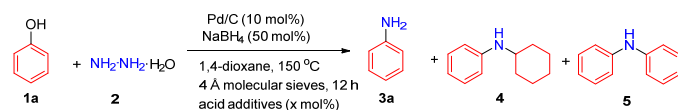

| entry           | acid additives<br>(x mol%)            | conv.<br>(%) | yield<br>(%) |    |    |
|-----------------|---------------------------------------|--------------|--------------|----|----|
|                 |                                       |              | 3a           | 4  | 5  |
| 1               | -                                     | 100          | 58           | 8  | 2  |
| 2               | NiCl <sub>2</sub> (10)                | 87           | 27           | 46 | 5  |
| 3               | ZnF <sub>2</sub> (10)                 | 100          | 30           | 36 | 11 |
| 4               | ZnCl <sub>2</sub> (10)                | 55           | 10           | 4  | 1< |
| 5               | CuCl (10)                             | 97           | 27           | 36 | 14 |
| 6               | In(OAc) <sub>3</sub> (10)             | 100          | 21           | 48 | 9  |
| 7               | MnCl <sub>2</sub> (10)                | 100          | 47           | 22 | 8  |
| 8               | Al <sub>2</sub> O <sub>3</sub> (10)   | 100          | 51           | 17 | 3  |
| 9               | SnCl <sub>2</sub> (10)                | -            | -            | -  | -  |
| 10              | B <sub>2</sub> (OH) <sub>4</sub> (10) | 100          | 51           | 17 | 4  |
| 11              | B(OH) <sub>3</sub> (10)               | 100          | 34           | 34 | 11 |
| 12              | HCO <sub>2</sub> H (10)               | 100          | 36           | 40 | 8  |
| 13              | HOAc (10)                             | 81           | 41           | 12 | 3  |
| 14              | TFA (10)                              | 100          | 52           | 15 | 3  |
| 15 <sup>b</sup> | CO <sub>2</sub>                       | 87           | 13           | 46 | 14 |

[a] Reaction conditions: phenol (0.2 mmol, 1 equiv), N<sub>2</sub>H<sub>4</sub>·H<sub>2</sub>O (0.3 mmol, 1.5 equiv), 10 mol% of 5 wt% Pd/C, NaBH<sub>4</sub> (50 mol%), 100 mg 4 Å molecular sieve with additives in 1,4-dioxane (1 mL) were stirred under argon for 12 h; Starting material conversion and NMR yields were given with 1,3,5-trimethoxybenzene as the internal standard, and yields were calculated based on phenol; [b] The reaction was run under the atmosphere of sealed CO<sub>2</sub> instead of Argon.

**Table S5.** Evaluation of base additives<sup>[a]</sup>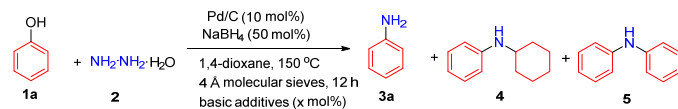

| entry | basic additives<br>(x mol%)           | conv.<br>(%) | yield<br>(%) |    |    |
|-------|---------------------------------------|--------------|--------------|----|----|
|       |                                       |              | 3a           | 4  | 5  |
| 1     | -                                     | 100          | 58           | 8  | 2  |
| 2     | LiO <sup>t</sup> Bu (10)              | 100          | 58           | 7  | 1  |
| 3     | NaO <sup>t</sup> Bu (10)              | 100          | 59           | 6  | 1  |
| 4     | NaO <sup>t</sup> Bu (20)              | 100          | 55           | 3  | 1< |
| 5     | KO <sup>t</sup> Bu (10)               | 100          | 59           | 10 | 2  |
| 6     | CaO (10)                              | 100          | 60           | 8  | 1< |
| 7     | CaO (20)                              | 100          | 53           | 7  | 1< |
| 8     | NaOAc (20)                            | 100          | 50           | 6  | 1< |
| 9     | Na <sub>2</sub> CO <sub>3</sub> (10)  | 100          | 55           | 16 | 4  |
| 10    | K <sub>2</sub> CO <sub>3</sub> (10)   | 100          | 51           | 21 | 4  |
| 11    | Cs <sub>2</sub> CO <sub>3</sub> (10)  | 100          | 54           | 17 | 2  |
| 12    | Mg(OH) <sub>2</sub> (10)              | 100          | 54           | 14 | 3  |
| 13    | Na <sub>3</sub> PO <sub>4</sub> (10)  | 100          | 60           | 12 | 2  |
| 14    | Na <sub>3</sub> PO <sub>4</sub> (20)  | 100          | 50           | 22 | 5  |
| 15    | Na <sub>2</sub> HPO <sub>4</sub> (20) | 100          | 51           | 17 | 6  |
| 16    | NaH <sub>2</sub> PO <sub>4</sub> (20) | 100          | 40           | 24 | 6  |
| 17    | K <sub>3</sub> PO <sub>4</sub> (20)   | 100          | 60           | 10 | 2  |
| 18    | K <sub>3</sub> PO <sub>4</sub> (40)   | 100          | 52           | 12 | 3  |
| 19    | K <sub>2</sub> HPO <sub>4</sub> (20)  | 100          | 51           | 22 | 4  |

[a] Reaction conditions: phenol (0.2 mmol, 1 equiv), N<sub>2</sub>H<sub>4</sub>·H<sub>2</sub>O (0.3 mmol, 1.5 equiv), 10 mol% of 5 wt% Pd/C, NaBH<sub>4</sub> (50 mol%), 100 mg 4 Å molecular sieve with additives in 1,4-dioxane (1 mL) were stirred under argon for 12 h; Starting material conversion and NMR yields were given with 1,3,5-trimethoxybenzene as the internal standard, and yields were calculated based on phenol.

**Table S6.** Evaluation of hydride source<sup>[a]</sup>

| entry | hydride source<br>(x mol%)            | conv.<br>(%) | yield<br>(%) |          |          |
|-------|---------------------------------------|--------------|--------------|----------|----------|
|       |                                       |              | 3a           | 4        | 5        |
| 1     | <b>NaBH<sub>4</sub> (50)</b>          | <b>100</b>   | <b>58</b>    | <b>8</b> | <b>2</b> |
| 2     | HCO <sub>2</sub> Na (100)             | 97           | 34           | 30       | 18       |
| 3     | H <sub>2</sub> (sealed in 10 mL tube) | 100          | 18           | 38       | 12       |
| 4     | 1,4-cyclohexadiene (200)              | 23           | 12           | 1<       | 1<       |

[a] Reaction conditions: phenol (0.2 mmol, 1 equiv), N<sub>2</sub>H<sub>4</sub>·H<sub>2</sub>O (0.3 mmol, 1.5 equiv), 10 mol% of 5 wt% Pd/C, various hydride sources with 100 mg 4 Å molecular sieve in 1,4-dioxane (1 mL) were stirred under argon for 12 h; Starting material conversion and NMR yields were given with 1,3,5-trimethoxybenzene as the internal standard, and yields were calculated based on phenol; For entry 3, the reaction was run under hydrogen gas sealed in the reaction tube.

**Table S7.** Evaluation of *N* source<sup>[a]</sup>

| entry | <i>N</i> source | conv.<br>(%) | yield<br>(%) |          |          |
|-------|-----------------|--------------|--------------|----------|----------|
|       |                 |              | 3a           | 4        | 5        |
| 1     | <b>N1</b>       | <b>100</b>   | <b>58</b>    | <b>8</b> | <b>2</b> |
| 2     | N2              | -            | -            | -        | -        |
| 3     | N3              | 49           | 21           | 1<       | 1<       |
| 4     | N4              | -            | -            | -        | -        |
| 5     | N5              | -            | -            | -        | -        |
| 6     | N6              | -            | -            | -        | -        |
| 7     | N7              | 60           | 11           | 24       | 1<       |
| 8     | N8              | 87           | 18           | 56       | 1<       |

[a] Reaction conditions: phenol (0.2 mmol, 1 equiv), *N* sources (0.3 mmol, 1.5 equiv), 10 mol% of 5 wt% Pd/C, NaBH<sub>4</sub> (50 mol%) with 100 mg 4 Å molecular sieve in 1,4-dioxane (1 mL) were stirred under argon for 12 h; Starting material conversion and NMR yields were given with 1,3,5-trimethoxybenzene as the internal standard, and yields calculated were based on phenol; For entry 8, 10.5 equiv ammonia water was used with 200 mg 4 Å molecular sieve.

**Table S8.** Optimization of hydride and hydrazine amount<sup>[a]</sup>

| entry | N <sub>2</sub> H <sub>4</sub> ·H <sub>2</sub> O<br>(x equiv) | hydride source<br>(y equiv)    | conv.<br>(%) | yield<br>(%) |          |              |
|-------|--------------------------------------------------------------|--------------------------------|--------------|--------------|----------|--------------|
|       |                                                              |                                |              | 3a           | 4        | 5            |
| 1     | <b>1.5</b>                                                   | <b>NaBH<sub>4</sub> (0.5)</b>  | <b>100</b>   | <b>58</b>    | <b>8</b> | <b>2</b>     |
| 2     | 1.5                                                          | -                              | 67           | 25           | 4        | 10           |
| 3     | 4.5                                                          | -                              | 78           | 51           | 2        | 2            |
| 4     | 6.0                                                          | -                              | 82           | 49           | 2        | 2            |
| 5     | 4.5                                                          | NaBH <sub>4</sub> (0.5)        | 100          | 49           | 6        | 1<           |
| 6     | 4.5                                                          | NaBH <sub>4</sub> (0.25)       | 100          | 58           | 2        | 2            |
| 7     | 3.0                                                          | NaBH <sub>4</sub> (0.25)       | 100          | 58           | 4        | 2            |
| 8     | 3.0                                                          | HCO <sub>2</sub> Na (1.0)      | 100          | 61           | 10       | 7            |
| 9     | <b>N<sub>2</sub>H<sub>4</sub> (THF) (3.0)</b>                | <b>HCO<sub>2</sub>Na (1.0)</b> | <b>100</b>   | <b>64</b>    | <b>3</b> | <b>1&lt;</b> |

[a] Reaction conditions: phenol (0.2 mmol, 1 equiv), N<sub>2</sub>H<sub>4</sub>·H<sub>2</sub>O (x equiv), 10 mol% of 5 wt% Pd/C, various hydride sources with 4 Å molecular sieve (100 mg per 0.3 mmol N<sub>2</sub>H<sub>4</sub>·H<sub>2</sub>O) in 1,4-dioxane (1 mL) were stirred under argon for 12 h; Starting material conversion and NMR yields were given with 1,3,5-trimethoxybenzene as the internal standard, and yields were calculated based on phenol.

**Table S9.** Optimization of hydride, additives, and hydrazine amount in N<sub>2</sub>H<sub>4</sub> in THF solution (1M)<sup>[a]</sup>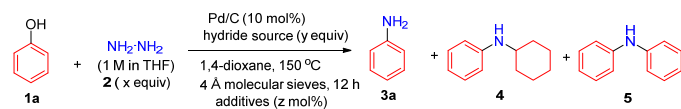

| entry | N <sub>2</sub> H <sub>4</sub> in THF (x equiv) | hydride source (y equiv)  | additives (z mol%)         | conv. (%) | yield (%) |    |    |
|-------|------------------------------------------------|---------------------------|----------------------------|-----------|-----------|----|----|
|       |                                                |                           |                            |           | 3a        | 4  | 5  |
| 1     | 3.0                                            | HCO <sub>2</sub> Na (1.0) | -                          | 100       | 64        | 3  | 1< |
| 2     | 3.0                                            | HCO <sub>2</sub> Na (1.0) | LiOH (20)                  | 97        | 54        | 2  | 1< |
| 3     | 3.0                                            | HCO <sub>2</sub> Na (1.0) | LiOH (40)                  | 100       | 68        | 2  | 1< |
| 4     | 3.0                                            | HCO <sub>2</sub> Na (1.0) | LiOH (50)                  | 89        | 57        | 2  | 1< |
| 5     | 3.0                                            | HCO <sub>2</sub> Na (1.0) | LiOH (80)                  | 96        | 57        | 1  | 1< |
| 6     | 3.0                                            | HCO <sub>2</sub> Na (1.0) | LiOH (160)                 | 95        | 43        | 1< | 1< |
| 7     | 3.0                                            | HCO <sub>2</sub> Na (1.0) | LiOH·H <sub>2</sub> O (40) | 89        | 63        | 2  | 1< |
| 8     | 3.0                                            | HCO <sub>2</sub> Na (1.0) | LiF (40)                   | 91        | 58        | 2  | 1< |
| 9     | 3.0                                            | HCO <sub>2</sub> Na (1.0) | LiCl (40)                  | 100       | 56        | 5  | 2  |
| 10    | 3.0                                            | HCO <sub>2</sub> Na (1.0) | LiBr (40)                  | 83        | 50        | 2  | 1< |
| 11    | 3.0                                            | HCO <sub>2</sub> Na (1.0) | LiI (40)                   | -         | -         | -  | -  |
| 12    | 3.0                                            | HCO <sub>2</sub> Na (1.0) | LiBF <sub>4</sub> (40)     | 54        | 28        | 1< | 1< |
| 13    | 3.0                                            | HCO <sub>2</sub> Na (1.0) | LiOAc (40)                 | 59        | 28        | 1< | 1< |
| 14    | 3.0                                            | HCO <sub>2</sub> Na (1.0) | LiO <sup>t</sup> Bu (40)   | 96        | 56        | 2  | 1< |
| 15    | 2.25                                           | HCO <sub>2</sub> Na (1.0) | LiOH (40)                  | 100       | 69        | 4  | 2  |
| 16    | 1.875                                          | HCO <sub>2</sub> Na (1.0) | LiOH (40)                  | 92        | 56        | 2  | 1  |
| 17    | 1.5                                            | HCO <sub>2</sub> Na (1.0) | LiOH (40)                  | 97        | 56        | 7  | 4  |
| 18    | 2.25                                           | HCO <sub>2</sub> Na (1.0) | -                          | 100       | 55        | 12 | 3  |
| 19    | 2.25                                           | HCO <sub>2</sub> Na (1.0) | NaOH (40)                  | 100       | 64        | 5  | 3  |
| 20    | 2.25                                           | HCO <sub>2</sub> Na (1.0) | Ca(OH) <sub>2</sub> (20)   | 100       | 65        | 5  | 2  |
| 21    | 2.25                                           | HCO <sub>2</sub> Na (1.0) | KOH (40)                   | 100       | 61        | 7  | 3  |
| 22    | 2.25                                           | HCO <sub>2</sub> H (1.0)  | -                          | 86        | 36        | 5  | 10 |
| 23    | 2.25                                           | HCO <sub>2</sub> H (1.0)  | LiOH (100)                 | 98        | 51        | 3  | 2  |
| 24    | 2.25                                           | HCO <sub>2</sub> H (1.0)  | LiOH (140)                 | 95        | 59        | 3  | 2  |
| 25    | 2.25                                           | HCO <sub>2</sub> Na (1.0) | H <sub>2</sub> O (40)      | 100       | 55        | 10 | 3  |
| 26    | 2.25                                           | NaBH <sub>4</sub> (0.25)  | LiOH (40)                  | 100       | 62        | 1< | 1< |
| 27    | 2.25                                           | NaBH <sub>4</sub> (0.5)   | LiOH (40)                  | 100       | 47        | 1< | 1< |

[a] Reaction conditions: phenol (0.2 mmol, 1 equiv), N<sub>2</sub>H<sub>4</sub> in THF solution (1 M) (x equiv), 10 mol% of 5 wt% Pd/C, various hydride sources, 4 Å molecular sieve (100 mg per 0.3 mmol N<sub>2</sub>H<sub>4</sub> (THF) in 1,4-dioxane (0.2 M) with additives were stirred under argon for 12 h; Starting material conversion and NMR yields were given with 1,3,5-trimethoxybenzene as the internal standard, and yields were calculated based on phenol.

**Table S10.** Evaluation of temperature, Pd/C amount in N<sub>2</sub>H<sub>4</sub> in THF solution (1M)<sup>[a]</sup>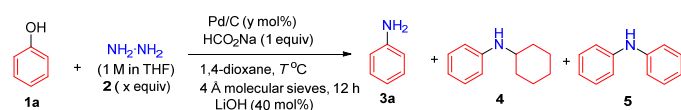

| entry          | N <sub>2</sub> H <sub>4</sub> in THF (x equiv) | Pd/C (y mol%) | T (°C) | conv. (%) | yield (%) |   |    |
|----------------|------------------------------------------------|---------------|--------|-----------|-----------|---|----|
|                |                                                |               |        |           | 3a        | 4 | 5  |
| 1 <sup>b</sup> | 2.25                                           | 10            | 150    | 100       | 69        | 4 | 2  |
| 2              | 2.25                                           | 10            | 170    | 100       | 68        | 2 | 1  |
| 3              | 2.25                                           | 5             | 170    | 87        | 55        | 1 | 1< |
| 4              | 2.25                                           | 6             | 170    | 97        | 65        | 3 | 1< |
| 5 <sup>b</sup> | 2.25                                           | 7             | 170    | 100       | 72        | 4 | 2  |
| 6              | 2.25                                           | 9             | 170    | 100       | 69        | 3 | 2  |
| 7              | 2.25                                           | 12.5          | 170    | 100       | 67        | 3 | 1< |
| 8              | 2.5                                            | 7             | 170    | 100       | 72        | 2 | 1  |
| 9              | 2.5                                            | 7             | 190    | 98        | 70        | 3 | 2  |
| 10             | 2.75                                           | 7             | 170    | 100       | 70        | 2 | 1  |
| 11             | 3.0                                            | 7             | 170    | 100       | 70        | 2 | 1  |
| 12             | 1.875                                          | 7             | 170    | 100       | 65        | 6 | 4  |
| 13             | 1.5                                            | 7             | 170    | 95        | 66        | 4 | 2  |

[a] Reaction conditions: phenol (0.4 mmol, 1 equiv), N<sub>2</sub>H<sub>4</sub> in THF solution (1 M) (x equiv), y mol% of 5 wt% Pd/C, HCO<sub>2</sub>Na (0.4 mmol, 1 equiv), 4 Å molecular sieve (100 mg per 0.3 mmol N<sub>2</sub>H<sub>4</sub> (THF) in 1,4-dioxane (0.2 M) with LiOH (40 mol%) were stirred under argon for 12 h; Starting material conversion and NMR yields were given with 1,3,5-trimethoxybenzene as the internal standard, and yields were calculated based on phenol; [b] 0.2 mmol phenol was used instead.



**Table S11.** Optimization of the hydrazine amount for the phenol with hydrazine acting both as *N* and *H* sources without extra hydride donor<sup>[a]</sup>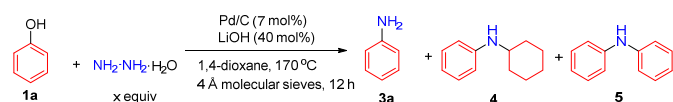

| entry          | N <sub>2</sub> H <sub>4</sub> ·H <sub>2</sub> O (x equiv) | conv. (%) | 3a (%)  | 4 (%) | 5 (%) |
|----------------|-----------------------------------------------------------|-----------|---------|-------|-------|
| 1              | N <sub>2</sub> H <sub>4</sub> ·H <sub>2</sub> O 4.5 eq    | 100       | 69      | 1<    | 1<    |
| 2              | N <sub>2</sub> H <sub>4</sub> ·H <sub>2</sub> O 3.0 eq    | 100       | 72 (71) | 1<    | 1<    |
| 3              | N <sub>2</sub> H <sub>4</sub> ·H <sub>2</sub> O 2.5 eq    | 84        | 64      | 1<    | 1<    |
| 4 <sup>b</sup> | N <sub>2</sub> H <sub>4</sub> ·H <sub>2</sub> O 4.5 eq    | 100       | 55      | 1<    | 1<    |

[a] Reaction conditions: phenol (0.4 mmol, 1 equiv), N<sub>2</sub>H<sub>4</sub>·H<sub>2</sub>O (x equiv), 7 mol% of 5 wt% Pd/C, LiOH (40 mol%), with 4 Å molecular sieve (100 mg per 0.3 mmol N<sub>2</sub>H<sub>4</sub>·H<sub>2</sub>O) in 1,4-dioxane (2 mL) were stirred under argon for 12 h; Starting material conversion and NMR yields were given with 1,3,5-trimethoxybenzene as the internal standard, isolated yield was given in parentheses, yields calculated based on phenol; [b] the reaction was run under 150 °C instead.

**Table S12.** Examination of other catalysts under standard conditions<sup>[a]</sup>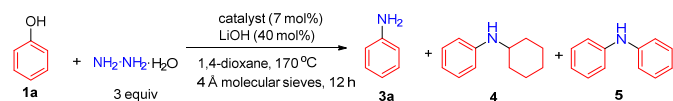

| entry | catalyst | conv. (%) | 3a (%) | 4 (%) | 5 (%) |
|-------|----------|-----------|--------|-------|-------|
| 1     | Pd/C     | 100       | 72     | 1<    | 1<    |
| 2     | Ru/C     | 4         | -      | -     | -     |
| 3     | Pt/C     | 6         | -      | -     | -     |
| 4     | Rh/C     | 6         | -      | -     | -     |

[a] Reaction conditions: phenol (0.4 mmol, 1 equiv), N<sub>2</sub>H<sub>4</sub>·H<sub>2</sub>O (3 equiv), 7 mol% catalyst, LiOH (40 mol%), with 4 Å molecular sieve (100 mg per 0.3 mmol N<sub>2</sub>H<sub>4</sub>·H<sub>2</sub>O) in 1,4-dioxane (2 mL) were stirred under argon for 12 h at 170 °C; Starting material conversion and NMR yields were given with 1,3,5-trimethoxybenzene as the internal standard.

**Scheme S1.** The preliminary results of lignin monomers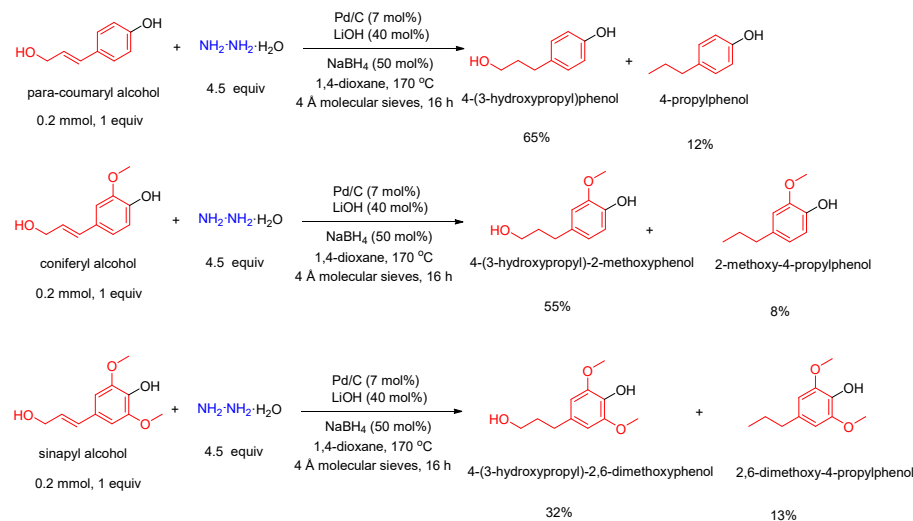

The desired primary aniline products were not detected, instead 4-(3-hydroxypropyl)phenol type products and 4-propylphenol type products were observed.

## IV. Synthesis of Starting Phenol Materials

### 1. Synthesis of *N*-(4-hydroxyphenethyl)acetamide (**1ai**):

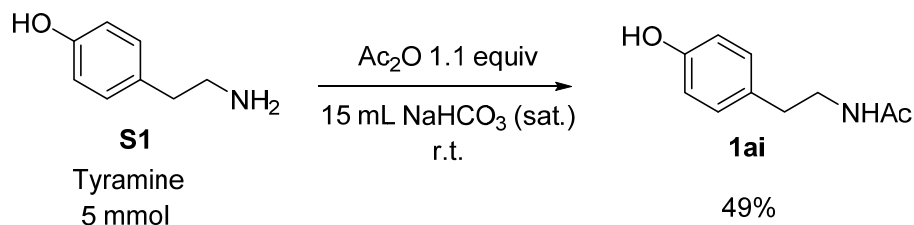

The synthesis of *N*-(4-hydroxyphenethyl)acetamide (**1ai**) was based on the reported literature.<sup>[30]</sup> Tyramine (**S1**) (5 mmol, 1 equiv) was dissolved into 15 mL NaHCO<sub>3</sub> saturated aq. solution. Then acetic anhydride (5.5 mmol, 1.1 equiv) was added slowly dropwise while the solution being stirred. The resulting suspension was allowed to stir at room temperature for one and half hour. Then aqueous solution was extracted with EtOAc (3x30 mL). The organic phases were collected, dried over Na<sub>2</sub>SO<sub>4</sub> and the solvent was removed under vacuum. The product was then purified by the silica gel column chromatography (DCM: MeOH 30:1 to 10:1) to afford *N*-(4-hydroxyphenethyl)acetamide (**1ai**) as a white solid in 49% yield. <sup>1</sup>H NMR: (500 MHz, DMSO-d<sub>6</sub>, ppm): δ 9.19 (br, 1H), 7.87 (br, 1H), 6.99 (d, *J* = 8.4 Hz, 2H), 6.68 (d, *J* = 8.4 Hz, 2H), 3.18 (dd, *J* = 13.3 Hz, 7.1 Hz, 2H), 2.58 (t, *J* = 7.5 Hz, 2H), 1.79 (s, 3H); <sup>13</sup>C NMR: (125 MHz, DMSO-d<sub>6</sub>, ppm): δ 169.0, 155.6, 129.5, 115.1, 40.6, 34.4, 22.6; HRMS: (APCI, *m/z*) calcd for C<sub>10</sub>H<sub>14</sub>O<sub>2</sub>N [M+H]<sup>+</sup> 180.1019, found: 180.1021

### 2. Synthesis of *Ac*-Tyr-NH<sub>2</sub> (**1aj**):

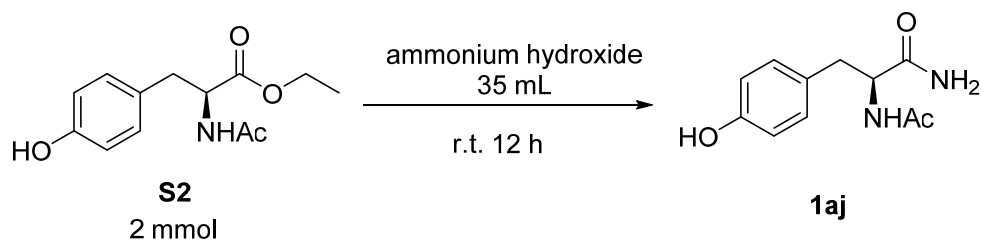

*Ac*-Tyr-OEt (**S2**) (2 mmol, 1 equiv) was dissolved into 35 mL ammonium hydroxide aq. solution. The resulting solution was allowed to stir at room temperature for 12 hours. Then water was removed with a rotary evaporator with the help of the ethanol (3x15 mL). After that, the crude compound was put under high vacuum for 4 hours to give the pure product as a white solid. This product was directly used without any further purification. <sup>1</sup>H NMR: (500 MHz, DMSO-d<sub>6</sub>, ppm): δ 9.18 (br, 1H), 7.95 (dd, *J* = 8.4 Hz, 1H), 7.38 (br, 1H), 7.02 (d, *J* = 8.5 Hz, 2H), 6.98 (br, 1H), 6.64 (d, *J* = 8.5 Hz, 2H), 4.35 – 4.30 (m, 1H), 2.86 (dd, *J* = 13.8 Hz, 4.8 Hz, 1H), 2.61 (dd, *J* = 13.8 Hz, 9.6 Hz, 1H), 1.76 (s, 3H); <sup>13</sup>C NMR: (125 MHz, DMSO-d<sub>6</sub>, ppm): δ 173.5, 169.0, 155.7, 130.0, 128.2, 114.8, 54.2, 36.9, 22.5; HRMS: (APCI, *m/z*) calcd for C<sub>11</sub>H<sub>13</sub>O<sub>3</sub>N<sub>2</sub> [M-H]<sup>-</sup> 221.0932, found: 221.0923

## V. Spectroscopic Data of Synthesized Starting Phenol Materials

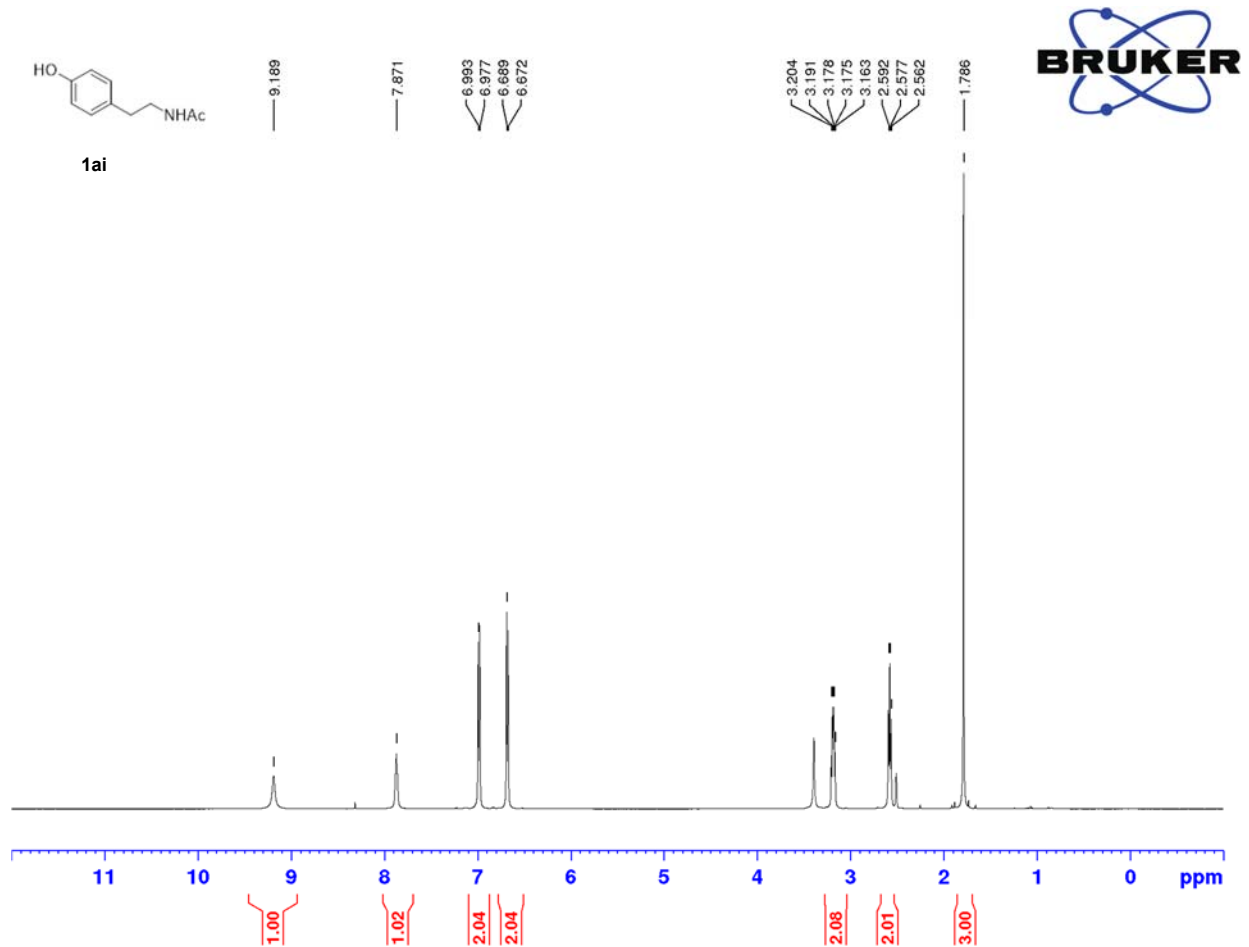

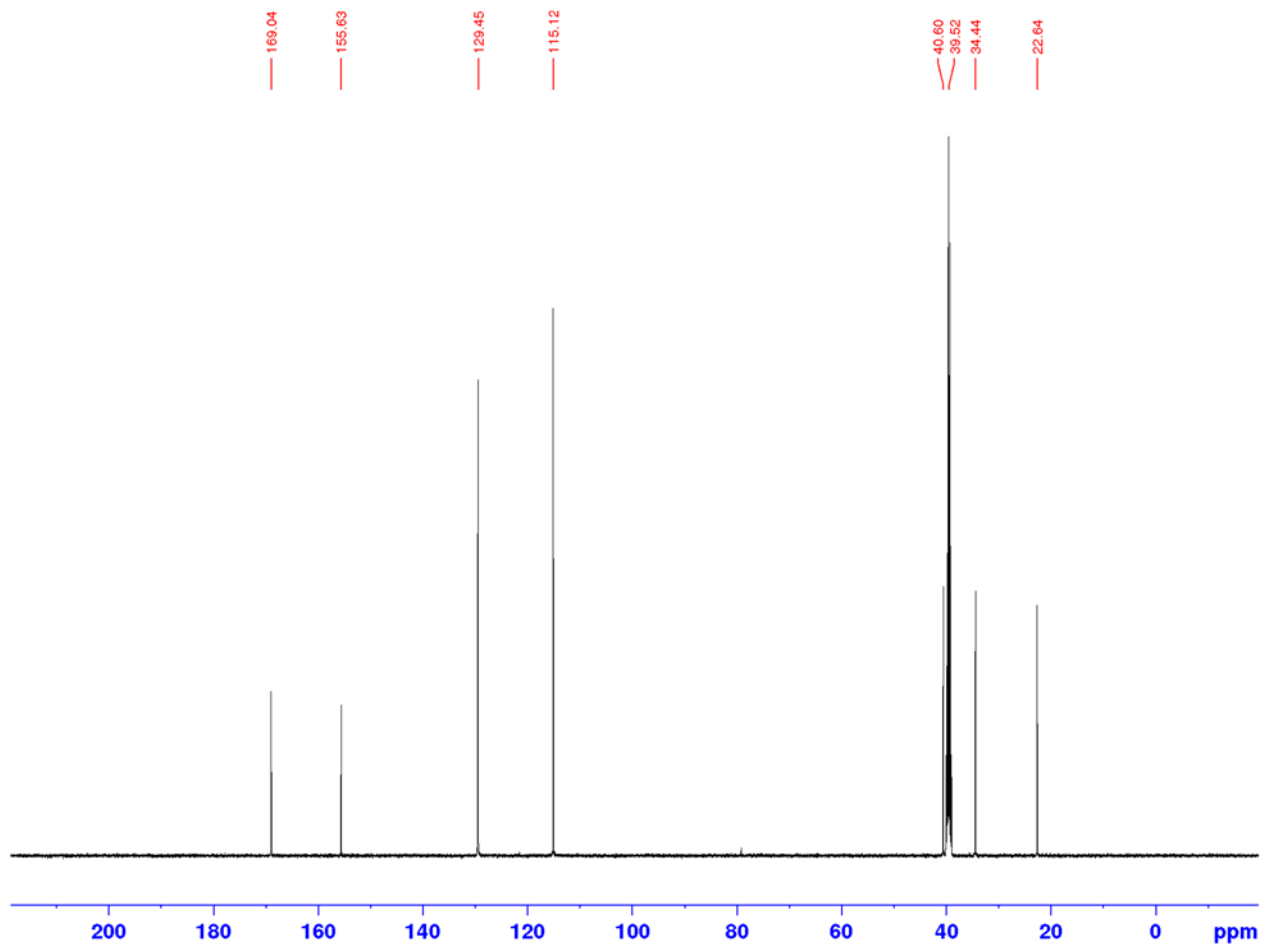

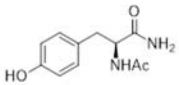

1aj

9.183

7.959  
7.942  
7.382  
7.024  
7.007  
6.976  
6.648  
6.631

4.350  
4.340  
4.331  
4.323  
4.314  
4.304

2.878  
2.868  
2.850  
2.840  
2.837  
2.618  
2.609  
2.590  
2.508  
1.764

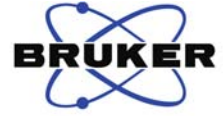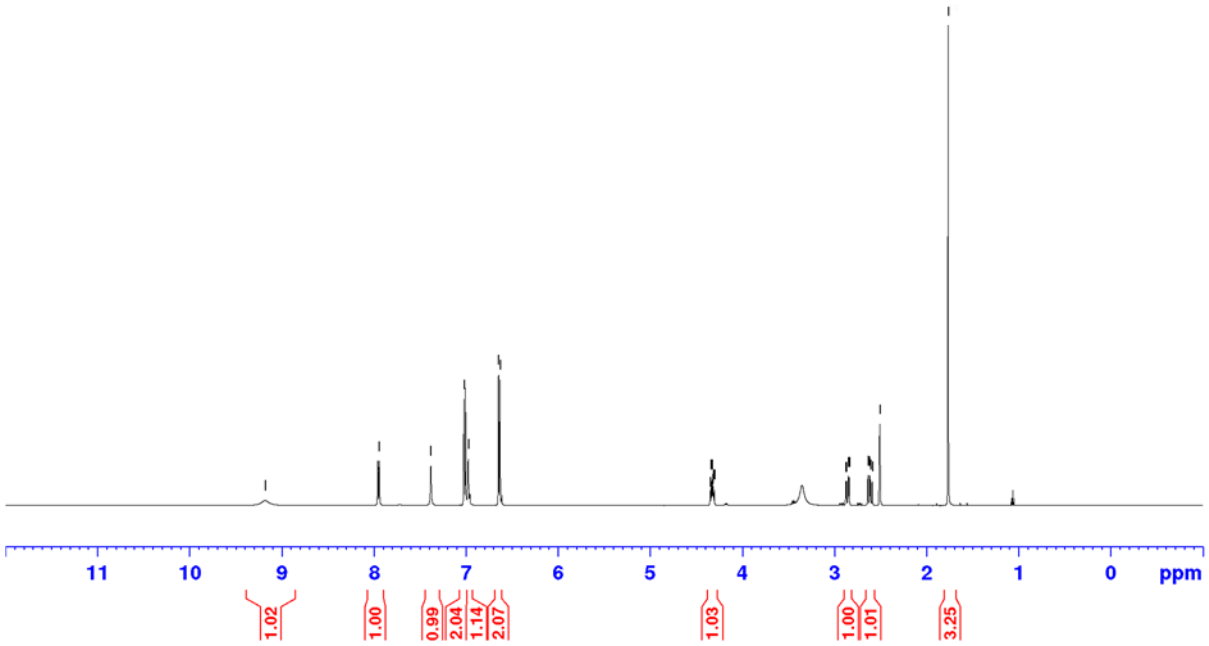

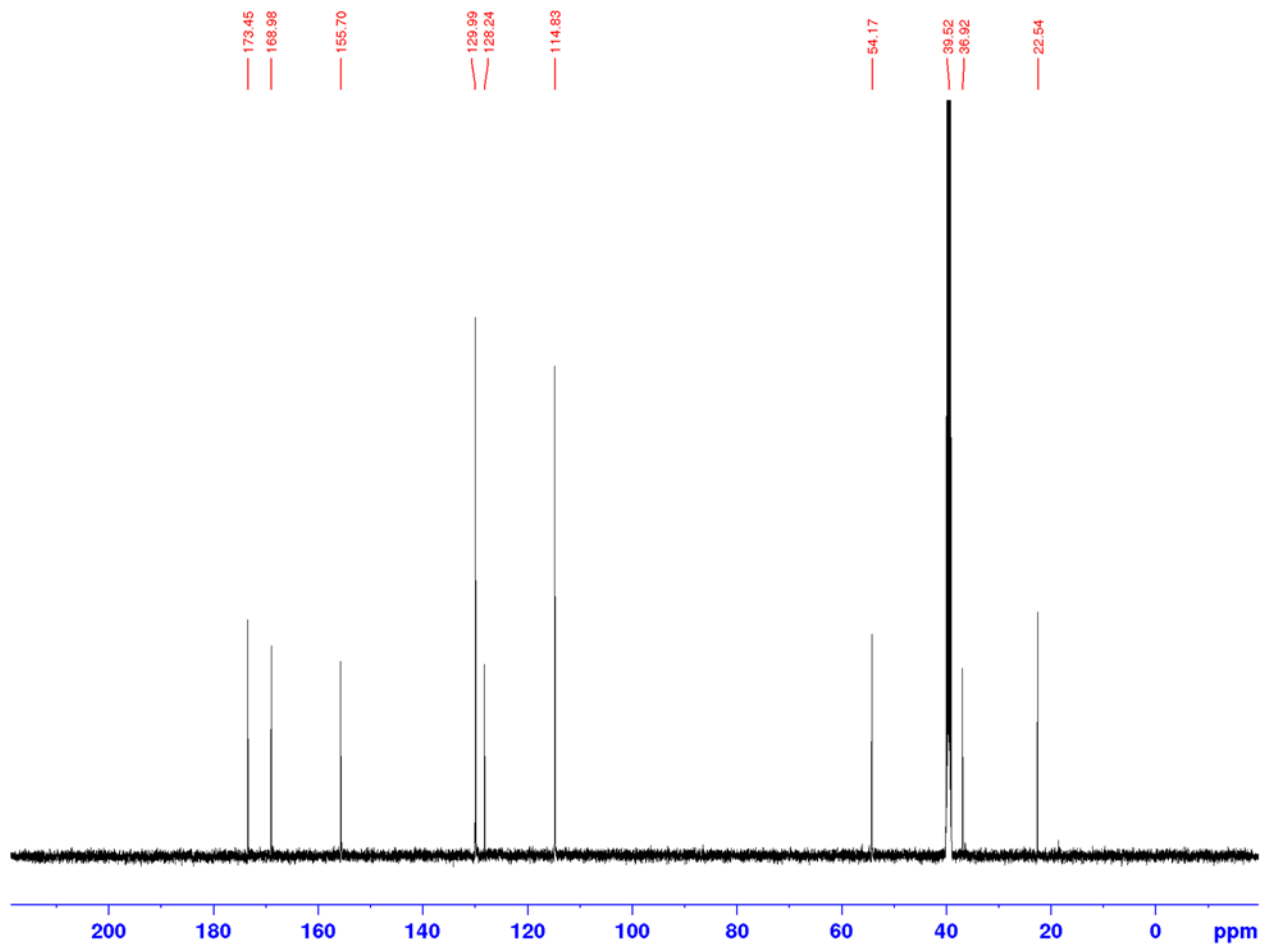

## VI. Spectroscopic Data of Products

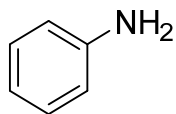

### Aniline (3a) (CAS: 62-53-3):<sup>[1]</sup>

Following the general procedure, DCM was used to perform the extraction. After column chromatography on silica gel (eluent: DCM: pentane: 1:1 to 4:1), the product was isolated as a pale yellow oil (26.4 mg, 71% yield). <sup>1</sup>H NMR: (500 MHz, CDCl<sub>3</sub>, ppm): δ 7.19 (t, *J* = 7.9 Hz, 2H), 6.80 (t, *J* = 3.1 Hz, 1H), 6.79 (d, *J* = 4.1 Hz, 2H), 3.64 (br, 2H); <sup>13</sup>C NMR: (125 MHz, CDCl<sub>3</sub>, ppm): δ 146.5, 129.4, 115.2; EI-MS (*m/z*): 93.0

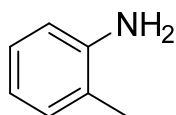

### o-Toluidine (3b) (CAS: 95-53-4):<sup>[2]</sup>

Following the general procedure, EtOAc was used to perform the extraction. After preparative TLC isolation (eluent: hexanes: EtOAc = 5:1), the product was isolated as a pale yellow oil (30.5 mg, 71% yield). <sup>1</sup>H NMR: (500 MHz, CDCl<sub>3</sub>, ppm): δ 7.07 – 7.04 (m, 2H), 6.74 – 6.68 (m, 2H), 3.60 (br, 2H), 2.18 (s, 3H); <sup>13</sup>C NMR: (125 MHz, CDCl<sub>3</sub>, ppm): δ 144.7, 130.6, 127.1, 122.4, 118.7, 115.0, 17.5; EI-MS (*m/z*): 107.0

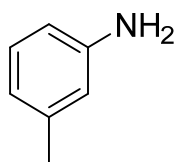

### m-Toluidine (3c) (CAS: 108-44-1):<sup>[3]</sup>

Following the general procedure, EtOAc was used to perform the extraction. After preparative TLC isolation (eluent: hexanes: EtOAc = 5:1), the product was isolated as a pale yellow oil (30.9 mg, 72% yield). <sup>1</sup>H NMR: (500 MHz, CDCl<sub>3</sub>, ppm): δ 7.06 (t, *J* = 7.7 Hz, 1H), 6.60 (d, *J* = 7.5 Hz, 1H), 6.53 – 6.50 (m, 2H), 3.60 (br, 2H), 2.28 (s, 3H); <sup>13</sup>C NMR: (125 MHz, CDCl<sub>3</sub>, ppm): δ 146.5, 139.2, 129.3, 119.6, 116.0, 112.4, 21.6; EI-MS (*m/z*): 107.1

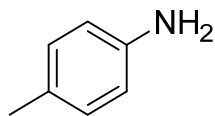

**p-Toluidine (3d) (CAS: 106-49-0):<sup>[1]</sup>**

Following the general procedure, EtOAc was used to perform the extraction. After preparative TLC isolation (eluent: hexanes: EtOAc = 5:1), the product was isolated as a pale yellow solid (31.0 mg, 72% yield). <sup>1</sup>H NMR: (500 MHz, CDCl<sub>3</sub>, ppm): δ 6.97 (d, *J* = 7.9 Hz, 2H), 6.62 (d, *J* = 8.4 Hz, 2H), 3.53 (br, 2H), 2.25 (s, 3H); <sup>13</sup>C NMR: (125 MHz, CDCl<sub>3</sub>, ppm): δ 143.9, 129.9, 127.9, 115.4, 20.6; EI-MS (*m/z*): 106.9

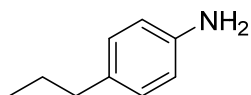

**4-Propylaniline (3e) (CAS: 2696-84-6):<sup>[26]</sup>**

Following the general procedure, EtOAc was used to perform the extraction. After preparative TLC isolation (eluent: hexanes: EtOAc = 5:1), the product was isolated as an orange oil (38.1 mg, 71% yield). <sup>1</sup>H NMR: (500 MHz, CDCl<sub>3</sub>, ppm): δ 6.99 (d, *J* = 8.4 Hz, 2H), 6.64 (d, *J* = 8.4 Hz, 2H), 3.54 (br, 2H), 2.50 (t, *J* = 7.6 Hz, 2H), 1.61 (sext, *J* = 7.5 Hz, 2H), 0.94 (t, *J* = 7.3 Hz, 3H); <sup>13</sup>C NMR: (125 MHz, CDCl<sub>3</sub>, ppm): δ 144.2, 133.0, 129.3, 115.3, 37.3, 25.0, 13.9; EI-MS (*m/z*): 135.1

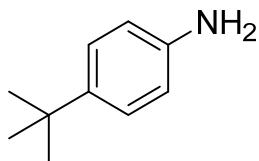

**4-(tert-Butyl)aniline (3f) (CAS: 769-92-6):<sup>[4]</sup>**

Following the general procedure, EtOAc was used to perform the extraction. After preparative TLC isolation (eluent: hexanes: EtOAc = 5:1), the product was isolated as a colorless oil (45.0 mg, 75% yield). <sup>1</sup>H NMR: (500 MHz, CDCl<sub>3</sub>, ppm): δ 7.19 (d, *J* = 8.6 Hz, 2H), 6.65 (d, *J* = 8.7 Hz, 2H), 3.55 (br, 2H), 1.29 (s, 9H); <sup>13</sup>C NMR: (125 MHz, CDCl<sub>3</sub>, ppm): δ 143.9, 141.6, 126.2, 115.1, 34.0, 31.7; EI-MS (*m/z*): 149.1



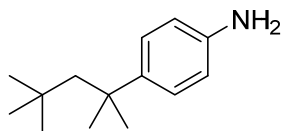

**4-(2,4,4-Trimethylpentan-2-yl)aniline (3g) (CAS: 42265-56-5):<sup>[23]</sup>**

Following the general procedure, EtOAc was used to perform the extraction. After preparative TLC isolation (eluent: hexanes: EtOAc = 3:1), the product was isolated as a colorless oil (42.8 mg, 52% yield). <sup>1</sup>H NMR: (500 MHz, CDCl<sub>3</sub>, ppm): δ 7.16 (d, *J* = 8.7 Hz, 2H), 6.64 (d, *J* = 8.7 Hz, 2H), 3.54 (br, 2H), 1.69 (s, 2H), 1.33 (s, 6H), 0.74 (s, 9H); <sup>13</sup>C NMR: (125 MHz, CDCl<sub>3</sub>, ppm): δ 143.7, 140.4, 127.0, 114.9, 57.1, 37.9, 32.4, 31.9, 31.8; HRMS: (APCI, *m/z*) calcd for C<sub>14</sub>H<sub>24</sub>N [M+H]<sup>+</sup> 206.1903, found: 206.1903

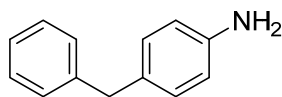

**4-Benzylaniline (3h) (CAS: 1135-12-2):<sup>[23]</sup>**

Following the general procedure, MeOH was used to perform the extraction. After preparative TLC isolation (eluent: hexanes: EtOAc = 3:1), the product was isolated as an orange oil (45.5 mg, 62% yield). <sup>1</sup>H NMR: (500 MHz, CDCl<sub>3</sub>, ppm): δ 7.32 – 7.29 (m, 2H), 7.22-7.20 (m, 3H), 7.01 (d, *J* = 8.3 Hz, 2H), 6.65 (d, *J* = 8.3 Hz, 2H), 3.91 (s, 2H), 3.56 (br, 2H); <sup>13</sup>C NMR: (125 MHz, CDCl<sub>3</sub>, ppm): δ 144.6, 142.0, 131.3, 129.9, 128.9, 128.5, 126.0, 115.4, 41.2; EI-MS (*m/z*): 183.1

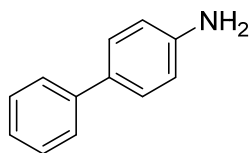

**[1,1'-Biphenyl]-4-amine (3i) (CAS: 92-67-1):<sup>[9]</sup>**

Following the general procedure, EtOAc was used to perform the extraction. After preparative TLC isolation (eluent: hexanes: EtOAc = 3:1), the product was isolated as a yellow solid (36.0 mg, 53% yield). <sup>1</sup>H NMR: (500 MHz, CDCl<sub>3</sub>, ppm): δ 7.55 (dd, *J* = 8.1 Hz, 1.3 Hz, 2H), 7.44 – 7.39 (m, 4H), 7.28 (tt, *J* = 7.4 Hz, 1.1 Hz, 1H), 6.77 (d, *J* = 8.5 Hz,

2H), 3.73 (br, 2H);  $^{13}\text{C}$  NMR: (125 MHz,  $\text{CDCl}_3$ , ppm):  $\delta$  146.0, 141.3, 131.7, 128.8, 128.1, 126.5, 126.4, 115.4; EI-MS ( $m/z$ ): 169.1

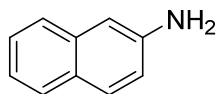

**Naphthalen-2-amine (3j) (CAS: 91-59-8):<sup>[2]</sup>**

Following the general procedure, EtOAc was used to perform the extraction. After column on silica gel isolation (eluent: hexanes: EtOAc = 5:1 to 3:1), the product was isolated as a white solid (49.1 mg, 86% yield).  $^1\text{H}$  NMR: (500 MHz,  $\text{CDCl}_3$ , ppm):  $\delta$  7.72 (d,  $J$  = 8.1 Hz, 1H), 7.68 (d,  $J$  = 8.7 Hz, 1H), 7.62 (d,  $J$  = 8.2 Hz, 1H), 7.41 – 7.38 (m, 1H), 7.27 – 7.24 (m, 1H), 7.00 (d,  $J$  = 2.2 Hz, 1H), 6.96 (dd,  $J$  = 8.7 Hz, 2.4 Hz, 1H), 3.84 (br, 2H);  $^{13}\text{C}$  NMR: (125 MHz,  $\text{CDCl}_3$ , ppm):  $\delta$  144.2, 135.0, 129.3, 128.1, 127.8, 126.5, 125.9, 122.6, 118.3, 108.7; EI-MS ( $m/z$ ): 143.1

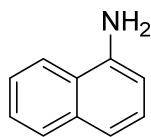

**Naphthalen-1-amine (3k) (CAS: 134-32-7):<sup>[2]</sup>**

Following the general procedure, EtOAc was used to perform the extraction. After preparative TLC isolation (eluent: hexanes: EtOAc = 5:1), the product was isolated as a white solid (41.5 mg, 73% yield).  $^1\text{H}$  NMR: (500 MHz,  $\text{CDCl}_3$ , ppm):  $\delta$  7.84 – 7.81 (m, 2H), 7.49 – 7.45 (m, 2H), 7.35 – 7.29 (m, 2H), 6.79 (dd,  $J$  = 7.0 Hz, 1.3 Hz, 1H), 4.15 (br, 2H);  $^{13}\text{C}$  NMR: (125 MHz,  $\text{CDCl}_3$ , ppm):  $\delta$  142.2, 134.5, 128.7, 126.5, 126.0, 125.0, 123.8, 120.9, 119.1, 109.8; EI-MS ( $m/z$ ): 143.1

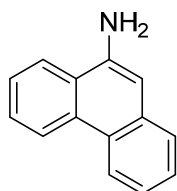

**Phenanthren-9-amine (3l) (CAS: 947-73-9):<sup>[8]</sup>**

Following the general procedure, EtOAc was used to perform the extraction. After preparative TLC isolation (eluent: hexanes: EtOAc = 3:1), the product was isolated as a pink solid (23.4 mg, 30% yield). <sup>1</sup>H NMR: (500 MHz, CDCl<sub>3</sub>, ppm): δ 8.72 (d, *J* = 7.0 Hz, 1H), 8.60 (d, *J* = 8.2 Hz, 1H), 7.94 (dd, *J* = 3.1 Hz, 0.9 Hz, 1H), 7.77 – 7.63 (m, 3H), 7.52 – 7.49 (m, 1H), 7.46-7.42 (m, 1H), 4.16 (br, 2H); <sup>13</sup>C NMR: (125 MHz, CDCl<sub>3</sub>, ppm): δ 140.0, 133.4, 131.3, 127.0, 126.8, 126.5, 126.4, 126.3, 125.6, 123.6, 123.5, 122.6, 121.4, 107.6; EI-MS (*m/z*): 193.1

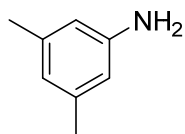

### 3,5-Dimethylaniline (3m) (CAS: 108-69-0):<sup>[10]</sup>

Following the general procedure, EtOAc was used to perform the extraction. After preparative TLC isolation (eluent: hexanes: EtOAc = 3:1), the product was isolated as a yellow solid (34.4 mg, 71% yield). <sup>1</sup>H NMR: (500 MHz, CDCl<sub>3</sub>, ppm): δ 6.43 (s, 1H), 6.34 (s, 2H), 3.54 (br, 2H), 2.23 (s, 6H); <sup>13</sup>C NMR: (125 MHz, CDCl<sub>3</sub>, ppm): δ 146.5, 139.1, 120.6, 113.2, 21.4; EI-MS (*m/z*): 121.1

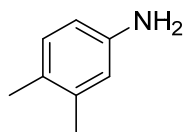

### 3,4-Dimethylaniline (3n) (CAS: 95-64-7):<sup>[24]</sup>

Following the general procedure, EtOAc was used to perform the extraction. After preparative TLC isolation (eluent: hexanes: EtOAc = 5:1), the product was isolated as a yellow solid (30.8 mg, 64% yield). <sup>1</sup>H NMR: (500 MHz, CDCl<sub>3</sub>, ppm): δ 6.94 (d, *J* = 7.9 Hz, 1H), 6.54 (d, *J* = 2.3 Hz, 1H), 6.47 (dd, *J* = 7.9 Hz, 2.4 Hz, 1H), 3.47 (br, 2H), 2.20 (s, 3H), 2.17 (s, 3H); <sup>13</sup>C NMR: (125 MHz, CDCl<sub>3</sub>, ppm): δ 144.3, 137.5, 130.4, 126.6, 117.0, 112.8, 20.0, 18.8; EI-MS (*m/z*): 121.1

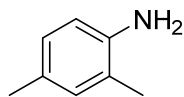

**2,4-Dimethylaniline (3o) (CAS: 95-68-1):<sup>[25]</sup>**

Following the general procedure, EtOAc was used to perform the extraction. After preparative TLC isolation (eluent: hexanes: EtOAc = 5:1), the product was isolated as a yellow solid (24.4 mg, 50% yield). <sup>1</sup>H NMR: (500 MHz, CDCl<sub>3</sub>, ppm): δ 6.89 (s, 1H), 6.86 (d, *J* = 7.9 Hz, 1H), 6.61 (d, *J* = 7.9 Hz, 1H), 3.40 (br, 2H), 2.24 (s, 3H), 2.16 (s, 3H); <sup>13</sup>C NMR: (125 MHz, CDCl<sub>3</sub>, ppm): δ 142.1, 131.2, 128.0, 127.4, 122.6, 115.2, 20.5, 17.4; EI-MS (*m/z*): 121.1

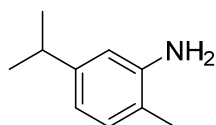

**5-Isopropyl-2-methylaniline (3p) (CAS: 2051-53-8):<sup>[19]</sup>**

Following the general procedure, EtOAc was used to perform the extraction. After preparative TLC isolation (eluent: hexanes: EtOAc = 3:1), the product was isolated as a colorless oil (30.0 mg, 50% yield). <sup>1</sup>H NMR: (500 MHz, CDCl<sub>3</sub>, ppm): δ 6.98 (d, *J* = 7.6 Hz, 1H), 6.60 (dd, *J* = 7.6 Hz, 1.7 Hz, 1H), 6.56 (d, *J* = 1.6 Hz, 1H), 3.57 (br, 2H), 2.80 (sept, *J* = 6.9 Hz, 1H), 2.14 (s, 3H), 1.22 (d, *J* = 6.9 Hz, 6H); <sup>13</sup>C NMR: (125 MHz, CDCl<sub>3</sub>, ppm): δ 148.1, 144.5, 130.5, 119.9, 116.9, 113.3, 33.9, 24.2, 17.1; EI-MS (*m/z*): 149.1

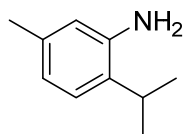

**2-Isopropyl-5-methylaniline (3q) (CAS: 2437-39-0):<sup>[3]</sup>**

Following the general procedure, EtOAc was used to perform the extraction. After preparative TLC isolation (eluent: hexanes: EtOAc = 3:1), the product was isolated as a colorless oil (X mg, X% yield). <sup>1</sup>H NMR: (500 MHz, CDCl<sub>3</sub>, ppm): δ 7.03 (d, *J* = 7.8 Hz, 1H), 6.61 (d, *J* = 7.8 Hz, 1H), 6.52 (d, *J* = 1.0 Hz, 1H), 3.60 (br, 2H), 2.87 (heptet, *J* = 6.9

Hz, 1H), 2.24 (s, 3H), 1.25 (d,  $J = 6.9$  Hz, 6H);  $^{13}\text{C}$  NMR: (125 MHz,  $\text{CDCl}_3$ , ppm):  $\delta$  143.3, 136.3, 130.0, 125.5, 119.9, 116.7, 27.5, 22.6, 21.1; EI-MS ( $m/z$ ): 149.1

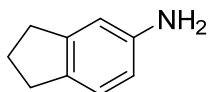

**2,3-Dihydro-1H-inden-5-amine (3r) (CAS: 24425-40-9):<sup>[15]</sup>**

Following the general procedure, EtOAc was used to perform the extraction. After preparative TLC isolation (eluent: hexanes: EtOAc = 3:1), the product was isolated as an orange solid (37.8 mg, 71% yield).  $^1\text{H}$  NMR: (500 MHz,  $\text{CDCl}_3$ , ppm):  $\delta$  7.02 (d,  $J = 7.9$  Hz, 1H), 6.61 (s, 1H), 6.51 (dd,  $J = 7.6$  Hz, 2.2 Hz, 1H), 3.44 (br, 2H), 2.84 – 2.80 (m, 4H), 2.05 (quint,  $J = 7.5$  Hz, 2H);  $^{13}\text{C}$  NMR: (125 MHz,  $\text{CDCl}_3$ , ppm):  $\delta$  145.6, 144.8, 134.5, 124.9, 113.5, 111.7, 33.1, 32.1, 25.8; EI-MS ( $m/z$ ): 133.1

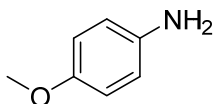

**4-Methoxyaniline (3s) (CAS: 104-94-9):<sup>[10]</sup>**

Following the general procedure, EtOAc was used to perform the extraction. After preparative TLC isolation (eluent: hexanes: EtOAc = 3:1), the product was isolated as a yellow solid (12.2 mg, 25% yield).  $^1\text{H}$  NMR: (500 MHz,  $\text{CDCl}_3$ , ppm):  $\delta$  6.75 (d,  $J = 8.8$  Hz, 2H), 6.65 (d,  $J = 8.9$  Hz, 2H), 3.75 (s, 3H), 3.21 (br, 2H);  $^{13}\text{C}$  NMR: (125 MHz,  $\text{CDCl}_3$ , ppm):  $\delta$  153.0, 140.0, 116.6, 115.0, 55.9; EI-MS ( $m/z$ ): 123.1

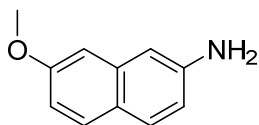

**7-Methoxynaphthalen-2-amine (3t) (CAS: 92287-46-2):<sup>[20]</sup>**

Following the general procedure, EtOAc was used to perform the extraction. After preparative TLC isolation (eluent: hexanes: EtOAc = 1:1), the product was isolated as a pink solid (38.2 mg, 55% yield).  $^1\text{H}$  NMR: (500 MHz,  $\text{CDCl}_3$ , ppm):  $\delta$  7.60 – 7.57 (m, 2H), 6.92 – 6.89 (m, 3H), 6.79 (dd,  $J = 8.6$  Hz, 2.3 Hz, 1H), 3.90 (s, 3H), 3.83 (br, 2H);  $^{13}\text{C}$

NMR: (125 MHz, CDCl<sub>3</sub>, ppm):  $\delta$  158.3, 144.8, 136.3, 129.3, 129.1, 123.5, 115.9, 115.1, 108.0, 104.3, 55.3; EI-MS (*m/z*): 173.1

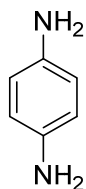

**Benzene-1,4-diamine (3u) (CAS: 106-50-3):<sup>[11]</sup>**

4-Aminophenol as starting material: following the general procedure, MeOH was used to perform the extraction. After preparative TLC isolation (eluent: DCM: MeOH = 10:1), the product was isolated as a grey solid (17.6 mg, 41% yield).

Hydroquinone as starting material: following the general procedure, MeOH was used to perform the extraction. After preparative TLC isolation (eluent: DCM: MeOH = 10:1), the product was isolated as a grey solid (21.7 mg, 50% yield).

<sup>1</sup>H NMR: (500 MHz, CDCl<sub>3</sub>, ppm):  $\delta$  6.57 (s, 4H), 3.33 (br, 4H); <sup>13</sup>C NMR: (125 MHz, CDCl<sub>3</sub>, ppm):  $\delta$  138.7, 116.8; EI-MS (*m/z*): 108.0

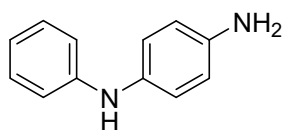

**N'-phenylbenzene-1,4-diamine (3v) (CAS: 101-54-2):<sup>[12]</sup>**

Following the general procedure, EtOAc was used to perform the extraction. After preparative TLC isolation (eluent: hexanes: EtOAc = 1:1), the product was isolated as a red solid (33.3 mg, 45% yield). <sup>1</sup>H NMR: (500 MHz, CDCl<sub>3</sub>, ppm):  $\delta$  7.19 (t, *J* = 6.5 Hz, 2H), 7.00 (d, *J* = 8.6 Hz, 2H), 6.86 (d, *J* = 8.7 Hz, 2H), 6.79 (t, *J* = 7.4 Hz, 1H), 6.67 (d, *J* = 8.6 Hz, 2H), 5.41 (br, 1H), 3.55 (br, 2H); <sup>13</sup>C NMR: (125 MHz, CDCl<sub>3</sub>, ppm):  $\delta$  146.0, 142.2, 134.0, 129.4, 123.5, 119.1, 116.3, 115.2; EI-MS (*m/z*): 184.1

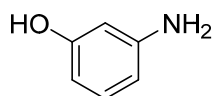

**3-Aminophenol (3w) (CAS: 591-27-5):<sup>[22]</sup>**

Following the general procedure, MeOH was used to perform the extraction. After preparative TLC isolation (eluent: hexanes: EtOAc = 1:1), the product was isolated as a light yellow solid (19.2 mg, 44% yield). <sup>1</sup>H NMR: (500 MHz, DMSO-d<sub>6</sub>, ppm): δ 8.84 (br, 1H), 6.77 (t, *J* = 8.1 Hz, 1H), 6.00 – 5.99 (m, 2H), 5.94 – 5.91 (m, 1H), 4.87 (br, 2H); <sup>13</sup>C NMR: (125 MHz, DMSO-d<sub>6</sub>, ppm): δ 158.1, 149.8, 129.4, 105.4, 103.3, 100.9; EI-MS (*m/z*): 109.0

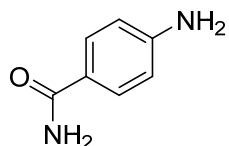

#### 4-Aminobenzamide (3x) (CAS: 2835-68-9):<sup>[16]</sup>

Following the general procedure, MeOH was used to perform the extraction. After preparative TLC isolation (eluent: DCM: MeOH = 10:1), the product was isolated as a light yellow solid (25.0 mg, 46% yield). <sup>1</sup>H NMR: (500 MHz, DMSO-d<sub>6</sub>, ppm): δ 7.59 (d, *J* = 8.6 Hz, 2H), 7.52 (br, 1H), 6.84 (br, 1H), 6.53 (d, *J* = 8.7 Hz, 2H), 5.60 (br, 2H); <sup>13</sup>C NMR: (125 MHz, DMSO-d<sub>6</sub>, ppm): δ 168.1, 151.7, 129.1, 120.9, 112.5; EI-MS (*m/z*): 136.1

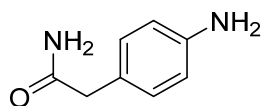

#### 2-(4-Aminophenyl)acetamide (3y) (CAS: 6633-76-7):<sup>[21]</sup>

Following the general procedure, MeOH was used to perform the extraction. After preparative TLC isolation (eluent: DCM: MeOH = 10:1), the product was isolated as a white solid (42.0 mg, 70% yield). <sup>1</sup>H NMR: (500 MHz, DMSO-d<sub>6</sub>, ppm): δ 7.25 (br, 1H), 6.90 (d, *J* = 8.4 Hz, 2H), 6.74 (br, 1H), 6.49 (d, *J* = 8.4 Hz, 2H), 4.89 (br, 2H), 3.15 (s, 2H); <sup>13</sup>C NMR: (125 MHz, DMSO-d<sub>6</sub>, ppm): δ 173.1, 147.0, 129.4, 123.4, 113.7, 41.6; EI-MS (*m/z*): 150.1

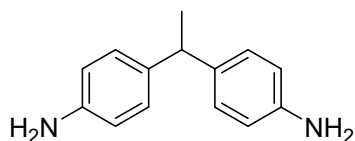

#### 4,4'-(Ethane-1,1-diyl)dianiline (3z) (CAS: 14755-35-2):<sup>[29]</sup>

Following the general procedure, MeOH was used to perform the extraction. After preparative TLC isolation (eluent: hexanes: EtOAc = 2:3), the product was isolated as a white solid (12.0 mg, 14% yield).  $^1\text{H}$  NMR: (500 MHz,  $\text{CDCl}_3$ , ppm):  $\delta$  6.99 (d,  $J$  = 8.2 Hz, 4H), 6.61 (d, 2H), 3.95 (q,  $J$  = 7.2 Hz, 1H), 3.54 (br, 4H), 1.54 (d,  $J$  = 7.5 Hz, 3H);  $^{13}\text{C}$  NMR: (125 MHz,  $\text{CDCl}_3$ , ppm):  $\delta$  144.3, 137.5, 128.4, 115.3, 43.2, 22.4; EI-MS ( $m/z$ ): 212.1

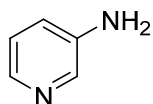

**Pyridin-3-amine (3aa) (CAS: 462-08-8):<sup>[6]</sup>**

Following the general procedure, MeOH was used to perform the extraction. After preparative TLC isolation (eluent: EtOAc: MeOH = 2:1), the product was isolated as a yellow solid (16.8 mg, 45% yield).  $^1\text{H}$  NMR: (500 MHz,  $\text{CDCl}_3$ , ppm):  $\delta$  8.09 (d,  $J$  = 2.7 Hz, 1H), 8.01 (d,  $J$  = 5.8 Hz, 1H), 7.05 (dd,  $J$  = 8.1 Hz, 4.1 Hz, 1H), 6.97 (ddd,  $J$  = 8.2 Hz, 2.8 Hz, 1.4 Hz, 1H), 3.71 (br, 2H);  $^{13}\text{C}$  NMR: (125 MHz,  $\text{CDCl}_3$ , ppm):  $\delta$  142.6, 140.2, 123.8, 121.6; EI-MS ( $m/z$ ): 94.0

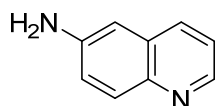

**Quinolin-6-amine (3ab) (CAS: 580-15-4):<sup>[14]</sup>**

Following the general procedure, EtOAc was used to perform the extraction. After preparative TLC isolation (eluent: EtOAc), the product was isolated as a brown solid (41.6 mg, 72% yield).  $^1\text{H}$  NMR: (500 MHz,  $\text{CDCl}_3$ , ppm):  $\delta$  8.65 (t,  $J$  = 4.2 Hz, 1.6 Hz, 1H), 7.90 (t,  $J$  = 8.5 Hz, 2H), 7.26 (dd,  $J$  = 8.3 Hz, 4.2 Hz, 1H), 7.15 (dd,  $J$  = 8.9 Hz, 2.6 Hz, 1H), 6.89 (d,  $J$  = 2.5 Hz, 1H), 3.94 (br, 2H);  $^{13}\text{C}$  NMR: (125 MHz,  $\text{CDCl}_3$ , ppm):  $\delta$  146.9, 144.8, 143.5, 133.9, 130.6, 129.9, 121.7, 121.5, 107.5; EI-MS ( $m/z$ ): 144.0

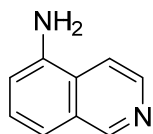

**Isoquinolin-5-amine (3ac) (CAS: 1125-60-6):<sup>[4]</sup>**



Following the general procedure, MeOH was used to perform the extraction. After preparative TLC isolation (eluent: hexanes: EtOAc = 1:2), the product was isolated as a yellow solid (17.5 mg, 30% yield). <sup>1</sup>H NMR: (500 MHz, CDCl<sub>3</sub>, ppm): δ 9.18 (d, *J* = 0.7 Hz, 1H), 8.49 (d, *J* = 6.0 Hz, 1H), 7.58 (d, *J* = 6.0 Hz, 1H), 7.42 – 7.41 (m, 2H), 6.97 – 6.95 (m, 1H), 4.21 (br, 2H); <sup>13</sup>C NMR: (125 MHz, CDCl<sub>3</sub>, ppm): δ 153.1, 142.2, 141.4, 129.6, 127.9, 126.1, 118.2, 114.2, 113.2; EI-MS (*m/z*): 144.1

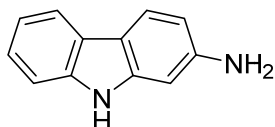

**9H-carbazol-2-amine (3ad) (CAS: 4539-51-9):<sup>[18]</sup>**

Following the general procedure, MeOH was used to perform the extraction. After preparative TLC isolation (eluent: acetone: EtOAc: hexanes = 1: 2: 2), the product was isolated as a yellow solid (47.8 mg, 66% yield). <sup>1</sup>H NMR: (500 MHz, acetone-d<sub>6</sub>, ppm): δ 9.84 (br, 1H), 7.84 (d, *J* = 7.8 Hz, 1H), 7.74 (d, *J* = 8.3 Hz, 1H), 7.32 (d, *J* = 8.0 Hz, 1H), 7.17 (t, *J* = 7.0 Hz, 1H), 7.03 (t, *J* = 7.5 Hz, 1H), 6.72 (d, *J* = 1.8 Hz, 1H), 6.57 (dd, *J* = 8.3 Hz, 2.0 Hz, 1H), 4.68 (br, 2H); <sup>13</sup>C NMR: (125 MHz, acetone-d<sub>6</sub>, ppm): δ 148.7, 143.2, 140.8, 125.2, 124.1, 121.5, 119.4, 119.3, 115.5, 111.0, 109.5, 96.0; EI-MS (*m/z*): 182.1

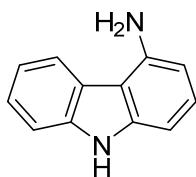

**9H-carbazol-4-amine (3ae) (CAS: 18992-64-8):<sup>[17]</sup>**

Following the general procedure, MeOH was used to perform the extraction. After preparative TLC isolation (eluent: DCM: hexanes = 10:1), the product was isolated as a yellow solid (22.0 mg, 30% yield). <sup>1</sup>H NMR: (500 MHz, CDCl<sub>3</sub>, ppm): δ 8.04 (br, 1H), 7.98 (d, *J* = 7.9 Hz, 1H), 7.44 – 7.37 (m, 2H), 7.25 – 7.22 (m, 2H), 6.90 (d, *J* = 8.0 Hz, 1H), 6.55 (d, *J* = 7.7, 1H), 4.34 (br, 2H); <sup>13</sup>C NMR: (125 MHz, CDCl<sub>3</sub>, ppm): δ 142.8, 141.0, 139.1, 127.1, 124.7, 123.1, 121.1, 119.6, 111.0, 110.3, 106.2, 101.3; EI-MS (*m/z*): 182.1

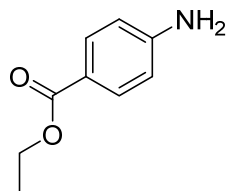

**Ethyl 4-aminobenzoate (3af) (CAS: 94-09-7):<sup>[5]</sup>**

Following the general procedure, EtOAc was used to perform the extraction. After preparative TLC isolation (eluent: hexanes: EtOAc = 5:1), the product was isolated as a white solid (21.1 mg, 32% yield). <sup>1</sup>H NMR: (500 MHz, CDCl<sub>3</sub>, ppm): δ 7.86 – 7.85 (m, 2H), 6.64 – 6.63 (m, 2H), 4.31 (q, *J* = 7.1 Hz, 2H), 4.05 (br, 2H), 1.36 (t, *J* = 7.1 Hz, 3H); <sup>13</sup>C NMR: (125 MHz, CDCl<sub>3</sub>, ppm): δ 166.8, 150.8, 131.7, 120.2, 113.9, 60.4, 14.6; EI-MS (*m/z*): 165.2

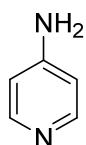

**Pyridin-4-amine (3ag) (CAS: 504-24-5):<sup>[7]</sup>**

Following the general procedure, MeOH was used to perform the extraction. After preparative TLC isolation (eluent: DCM: MeOH = 5:1), the product was isolated as a white solid (19.5 mg, 52% yield). <sup>1</sup>H NMR: (500 MHz, DMSO-d<sub>6</sub>, ppm): δ 7.95 (dd, *J* = 4.8 Hz, 1.6 Hz, 2H), 6.44 (dd, *J* = 4.7 Hz, 1.6 Hz, 2H), 5.95 (br, 2H); <sup>13</sup>C NMR: (125 MHz, DMSO-d<sub>6</sub>, ppm): δ 154.2, 149.5, 108.8; EI-MS (*m/z*): 94.0

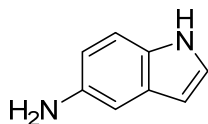

**1H-indol-5-amine (3ah) (CAS: 5192-03-0):<sup>[16]</sup>**

Following the general procedure, MeOH was used to perform the extraction. After preparative TLC isolation (eluent: hexanes: EtOAc = 1:1), the product was isolated as a yellow solid (47.3 mg, 90% yield). <sup>1</sup>H NMR: (500 MHz, CDCl<sub>3</sub>, ppm): δ 7.99 (br, 1H), 7.19 (d, *J* = 8.5 Hz, 1H), 7.12 (t, *J* = 2.8 Hz, 1H), 6.96 (d, *J* = 2.2 Hz, 1H), 6.67 (dd, *J* = 8.5 Hz,

2.2 Hz, 1H), 6.39 – 6.37 (m, 1H), 3.39 (br, 2H); <sup>13</sup>C NMR: (125 MHz, CDCl<sub>3</sub>, ppm): δ 139.6, 130.8, 128.9, 124.8, 113.1, 111.6, 105.7, 101.7; EI-MS (*m/z*): 132.0

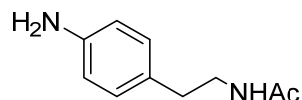

**N-(4-aminophenethyl)acetamide (3ai) (CAS: 40377-41-1):<sup>[27]</sup>**

Following the general procedure, MeOH was used to perform the extraction. After preparative TLC isolation (eluent: DCM: MeOH = 10:1), the product was isolated as a grey solid (45.0 mg, 63% yield). <sup>1</sup>H NMR: (500 MHz, CDCl<sub>3</sub>, ppm): δ 6.95 (d, *J* = 8.4 Hz, 2H), 6.62 (d, *J* = 8.4 Hz, 2H), 5.68 (br, 1H), 3.62 (br, 2H), 3.42 (q, *J* = 6.6 Hz, 2H), 2.67 (t, *J* = 7.0 Hz, 2H), 1.90 (s, 3H); <sup>13</sup>C NMR: (125 MHz, CDCl<sub>3</sub>, ppm): δ 170.2, 145.0, 129.6, 128.7, 115.4, 40.9, 34.7, 23.4; EI-MS (*m/z*): 178.1

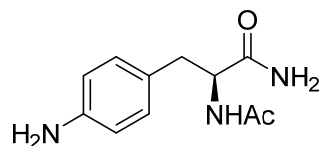

**(S)-2-acetamido-3-(4-aminophenyl)propanamide (3aj) (CAS: 115094-27-4):<sup>[28]</sup>**

Following the general procedure, MeOH was used to perform the extraction. After preparative TLC isolation (eluent: EtOAc: MeOH = 5:1), the product was isolated as a pale yellow solid (28.8 mg, 33% yield). <sup>1</sup>H NMR: (500 MHz, DMSO-*d*<sub>6</sub>, ppm): δ 7.90 (d, *J* = 8.5 Hz, 1H), 7.35 (s, 1H), 6.88 (s, 1H), 6.87 (d, *J* = 8.3 Hz, 2H), 6.44 (d, *J* = 8.3 Hz, 2H), 4.83 (s, 2H), 4.30 – 4.25 (m, 1H), 2.78 (dd, *J* = 13.8 Hz, 4.8 Hz, 1H), 2.54 (dd, *J* = 13.8 Hz, 9.5 Hz, 1H), 1.76 (s, 3H); <sup>13</sup>C NMR: (125 MHz, DMSO-*d*<sub>6</sub>, ppm): δ 173.6, 168.9, 146.8, 129.5, 113.7, 54.3, 37.0, 22.6; HRMS: (ESI, *m/z*) calcd for C<sub>11</sub>H<sub>15</sub>N<sub>3</sub>O<sub>2</sub>Na [M+Na]<sup>+</sup> 244.1062, found: 244.1057

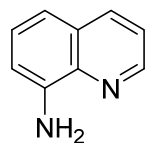

**Quinolin-8-amine (3ak) (CAS: 578-66-5):<sup>[13]</sup>**

Following the general procedure, EtOAc was used to perform the extraction. After preparative TLC isolation (eluent: hexanes: EtOAc = 1:1), the product was isolated as a yellow solid (14.1 mg, 24% yield).  $^1\text{H}$  NMR: (500 MHz,  $\text{CDCl}_3$ , ppm):  $\delta$  8.76 (dd,  $J = 4.2$  Hz, 1.7 Hz, 1H), 8.07 (dd,  $J = 8.3$  Hz, 1.7 Hz, 1H), 7.38 – 7.32 (m, 2H), 7.16 (dd,  $J = 8.1$  Hz, 1.1 Hz, 1H), 6.93 (dd,  $J = 7.5$  Hz, 1.2 Hz, 1H), 5.00 (br, 2H);  $^{13}\text{C}$  NMR: (125 MHz,  $\text{CDCl}_3$ , ppm):  $\delta$  147.6, 144.1, 138.6, 136.1, 129.0, 127.5, 121.5, 116.2, 110.2; EI-MS ( $m/z$ ): 144.0

## VII. References

- [1] M. Huang, J. Hou, R. Yang, L. Zhang, X. Zhu, Y. Wan, *Synthesis* **2014**, *46*, 3356.
- [2] R. Green, J.F. Hartwig, *Angew. Chem., Int. Ed.* **2015**, *54*, 3768.
- [3] X. Jin, Y. Koizumi, K. Yamaguchi, K. Nozaki, N. Mizuno, *J. Am. Chem. Soc.* **2017**, *139*, 13821.
- [4] Q. Shen, J. Hartwig, *J. Am. Chem. Soc.* **2006**, *128*, 10028.
- [5] T. Ichikawa, M. Netsu, M. Mizuno, T. Mizusaki, Y. Takagi, Y. Sawama, Y. Monguchi, H. Sajiki, *Adv. Synth. Catal.* **2017**, *359*, 2269.
- [6] Y. Motoyama, K. Kamo, H. Nagashima, *Org. Lett.* **2009**, *11*, 1345.
- [7] A. Gevorgyan, S. Mkrtchyan, T. Grigoryan, V. Laroshenko, *Org. Chem. Front.* **2017**, *4*, 2437.
- [8] T. Tempesti, A. Pierini, M. Baumgartner, *J. Org. Chem.* **2005**, *70*, 6508.
- [9] E. Alacid, C. Nájera, *Org. Lett.* **2008**, *10*, 5011.
- [10] D. Wang, Q. Cai, K. Ding, *Adv. Synth. Catal.* **2009**, *351*, 1722.
- [11] X. Gao, H. Fu, R. Qiao, Y. Jiang, Y. Zhao, *J. Org. Chem.* **2008**, *73*, 6864.
- [12] S. Kuhl, Y. Fort, R. Schneider, *J. Organomet. Chem.* **2005** *690*, 6169.
- [13] J. Spencer, R. Rathnam, H. Patel, N. Anjum, *Tetrahedron* **2008** *64*, 10195.
- [14] G. D. Vo, J.F. Hartwig, *J. Am. Chem. Soc.* **2009**, *131*, 11049.
- [15] M. Hay, K. Hicks, K. Pchalek, H. Lee, A. Blaser, F. Pruijn, R. Anderson, S. Shinde, W. Wilson. W. Denny, *J. Med. Chem.* **2008**, *51*, 6853.
- [16] V. Udumula, J. Tyler, D. Davis, H. Wang, M. Linford, P. Minson, D. Michaelis, *ACS Catal.* **2005**, *5*, 3457.
- [17] K. Tanemura, T. Suzuki, *J. Heterocyclic Chem.* **2004**, *41*,1.
- [18] Y. Qu, N. Jiao, *Chem. Commun.* **2013**, *49*, 3473.
- [19] M. D. Garrison, B. G. Harvey, *J. Appl. Polym. Sci.* **2016**, *133*, 43621.
- [20] Y.-H. Chen, L.-W. Qi, F. Fang, B. Tan, *Angew. Chem., Int. Ed.* **2017**, *56*, 16308.
- [21] U. B. Patil, A. S. Singh, J. M. Nagarkar, *RSC Adv.* **2014**, *4*, 1102.
- [22] K. J. Prathap, Q. Wu, R. T. Olsson, P. Dinér, *Org. Lett.* **2017**, *19*, 4746.
- [23] G. Manolikakes, C. Hernandez, M. Schade, A. Metzger, *J. Org. Chem.* **2008**, *73*, 8422.
- [24] H.-J. Xu, Y.-F. Liang, Z.-Y. Cai, H.-X. Qi, C.-Y. Yang, Y.-S. Feng, *J. Org. Chem.* **2011**, *76*, 2296.
- [25] S. Herold, S. Möhle, M. Zirbes, F. Richter, H. Nefzger, S. R. Waldvogel, *Eur. J. Org. Chem.* **2016**, *7*, 1274.
- [26] Y. Hoshino, N. Ohtsuka, T. Okada, K. Honda, *Tetrahedron Lett.* **2016**, *57*, 5304.
- [27] J. Jing, J. Bankefors, C. Bonneaud, E. Sawen, T. Gerfaud, J. Westin, G. El-Bazbouz, L. Kandelin, A. Rousseau, J. Olsson, A. Karlsson, L. Nord, C. Bouix-Peter, A. Kenne, J. Boiteau, L. Tomas, L. Hennequin, C. Harris, *Eur. J. Org. Chem.* **2018**, *23*, 2995.
- [28] C. H. Kruse, K. G. Holden, P. H. Offen, M. Pritchard, J. A. Field, D. J. Rieman, P. E. Bender, B. Ferguson, R. G. Greig, G. Poste, *J. Med. Chem.* **1988**, *31*, 1768.
- [29] B. Kim, A. J. Chinn, D. R. Fandrick, C. H. Senanayake, R. A. Singer, S. J. Miller, *J. Am. Chem. Soc.* **2016**, *138*, 7939
- [30] M. Antonio, F. Doria, S. Richter. C. Bertipaglia, M. Mella, C. Sissi, M. Palumbo, M. Freccero, *J. Am. Chem. Soc.* **2009**, *131*, 13132

# VIII. NMR Spectra of Products

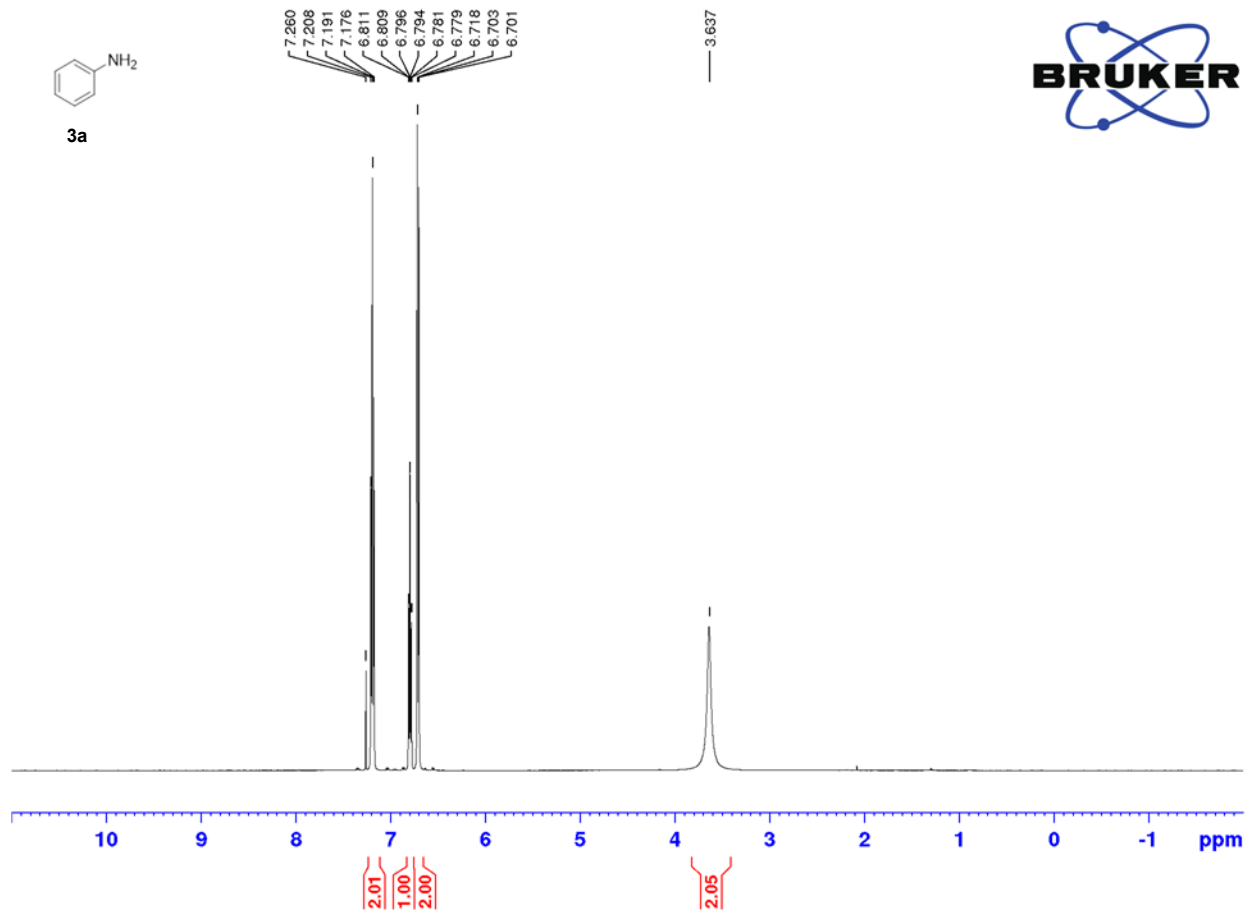

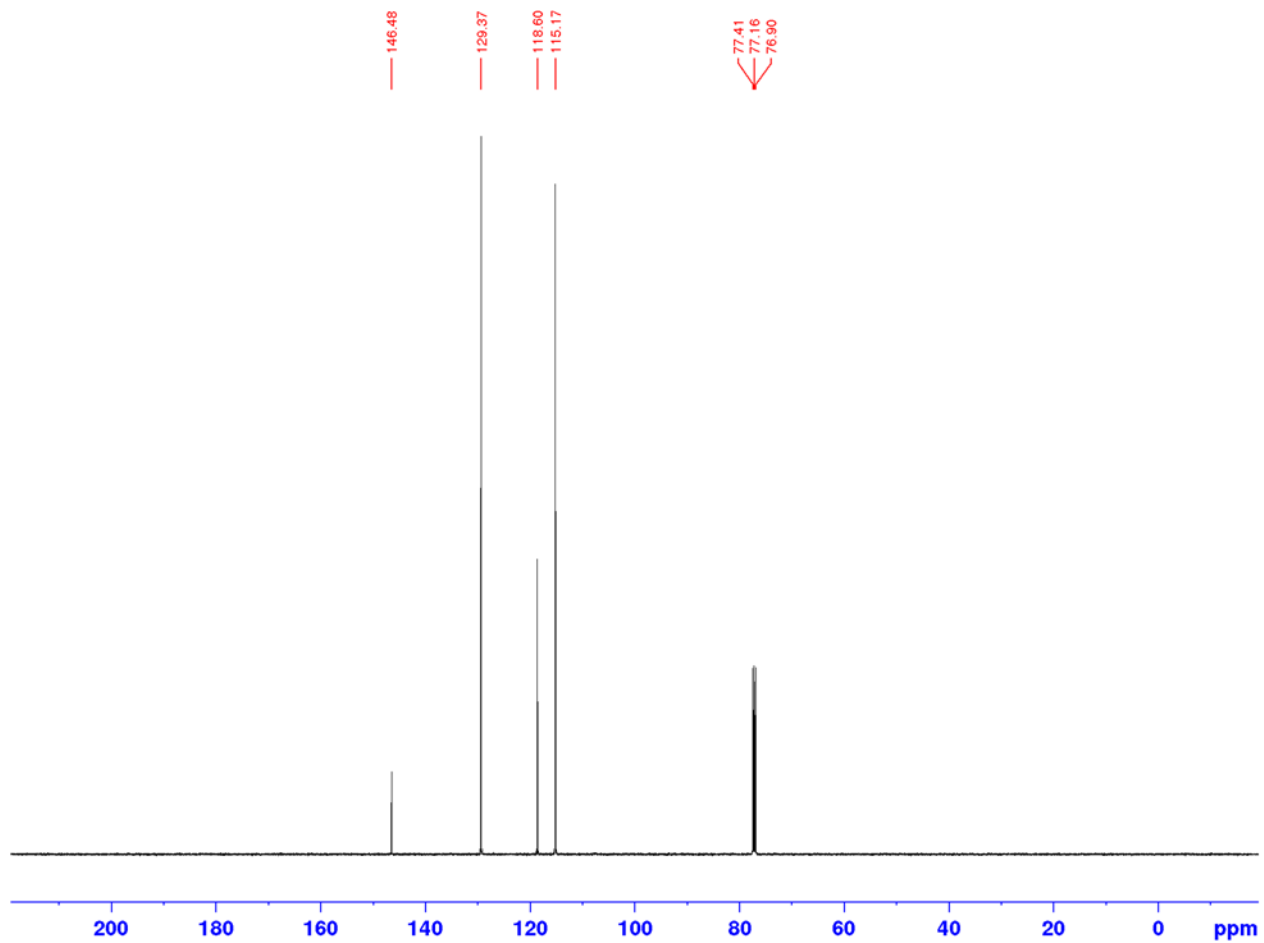

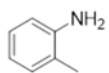

3b

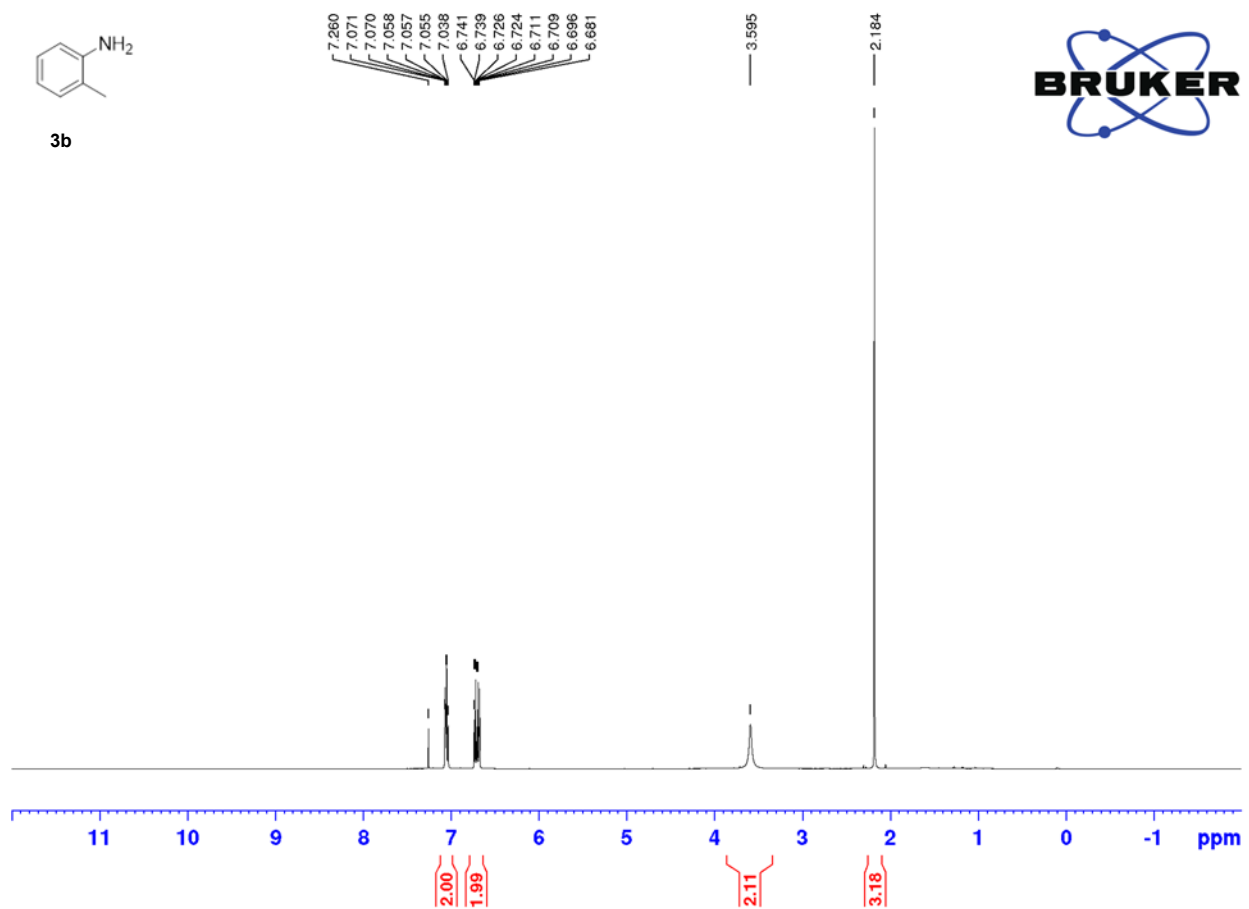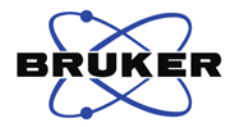



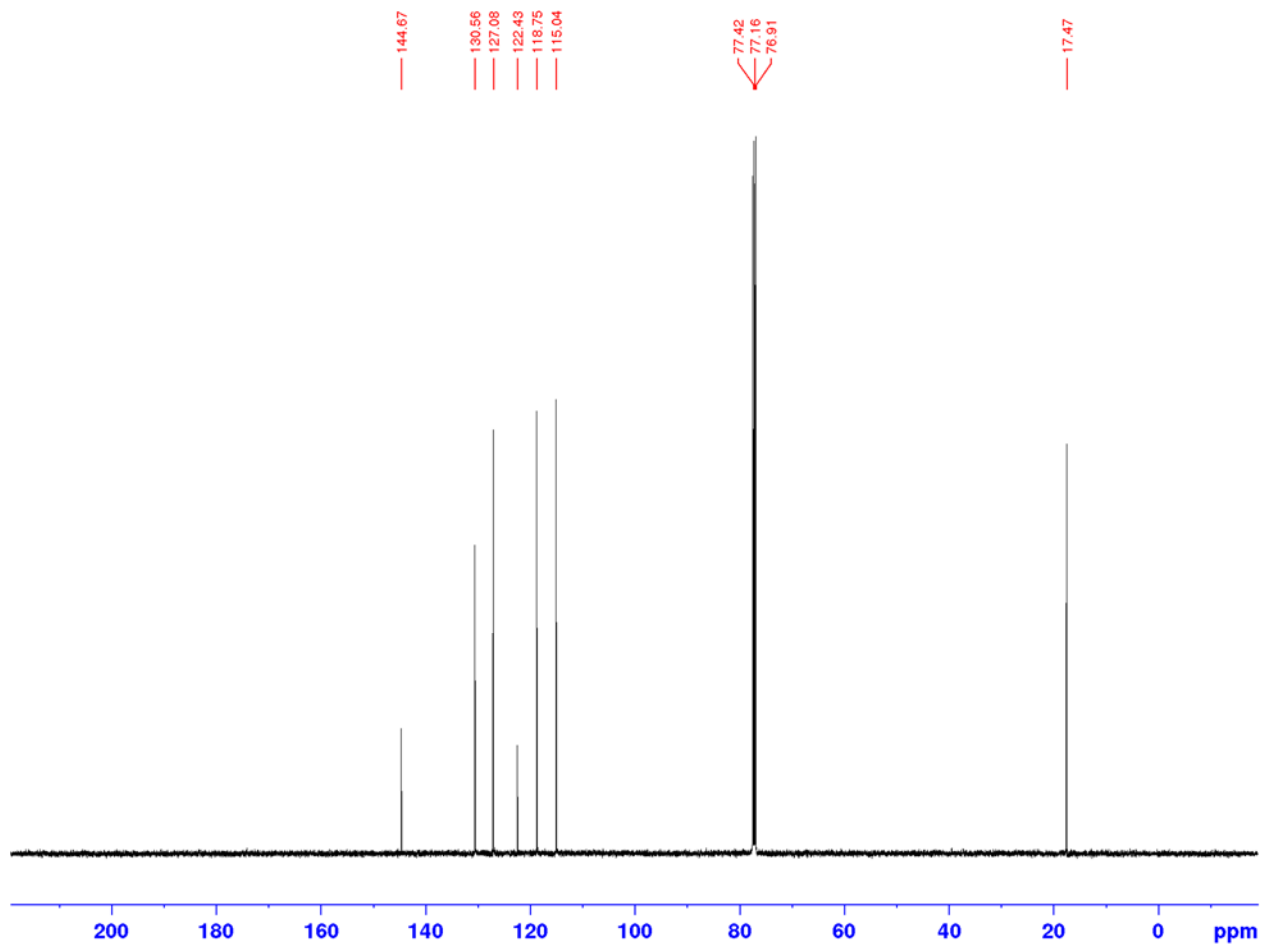

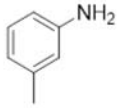

3c

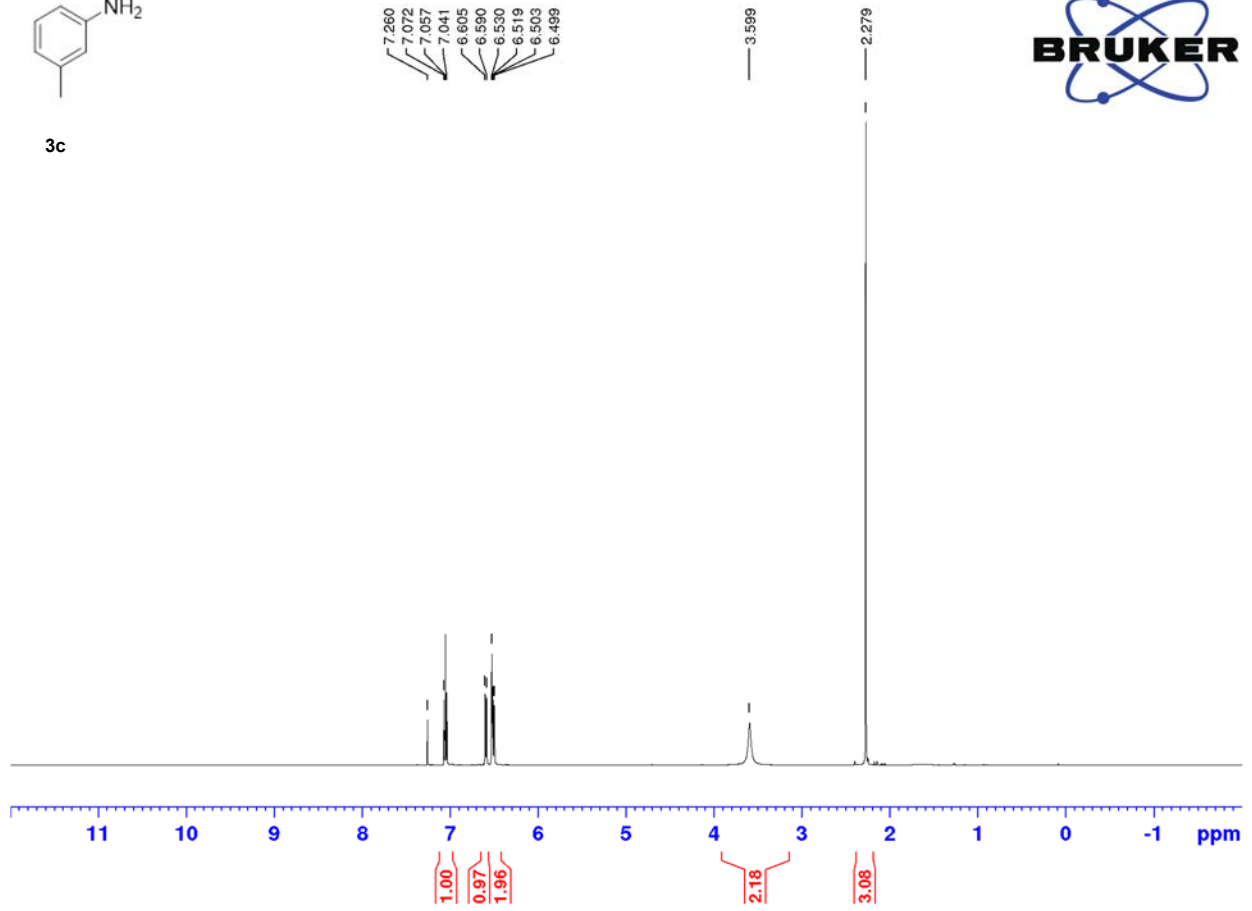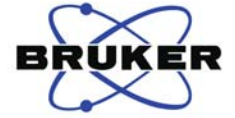

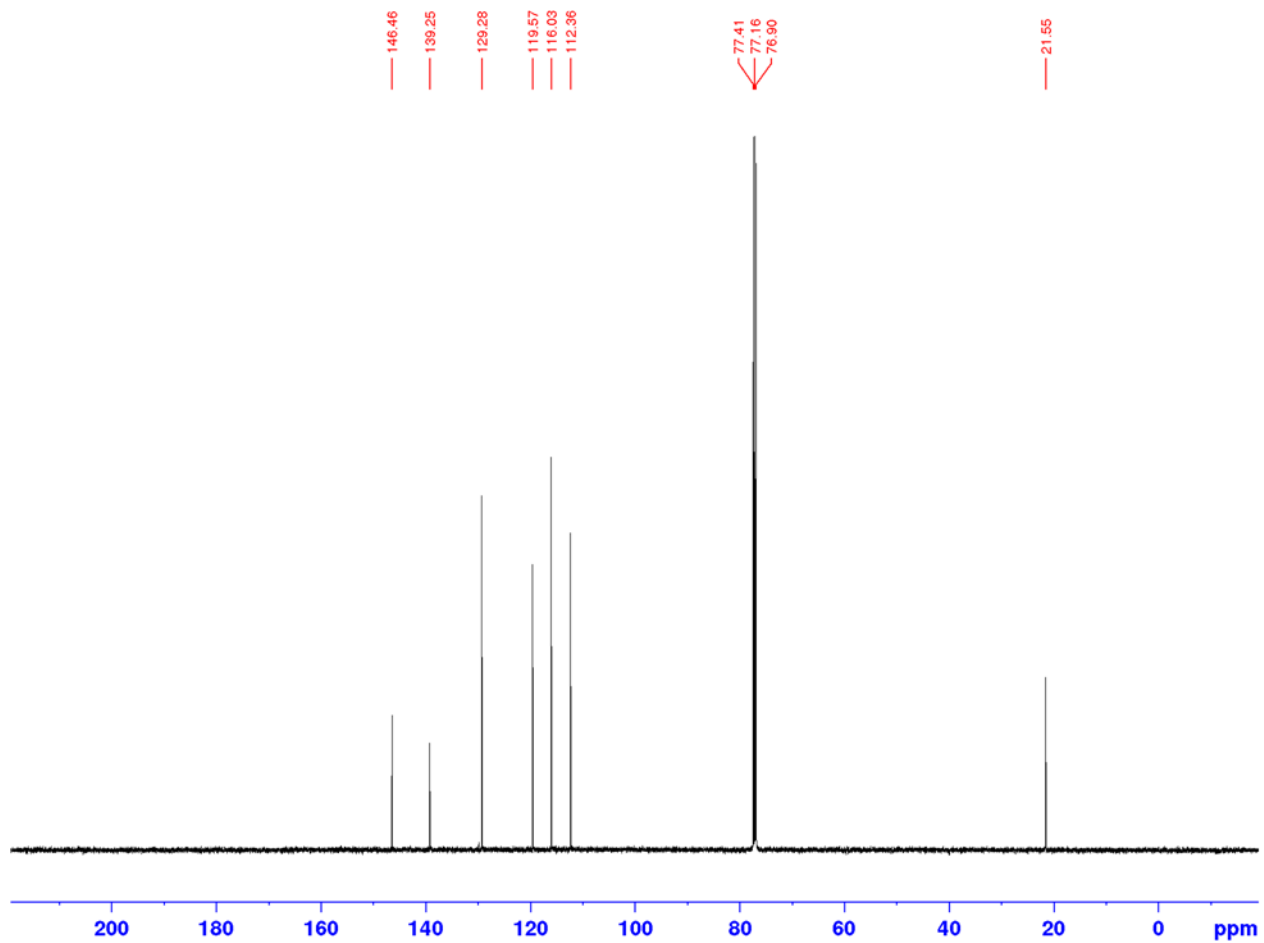

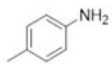

3d

7.260  
6.979  
6.963  
6.624  
6.607

3.528

2.245

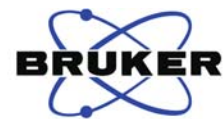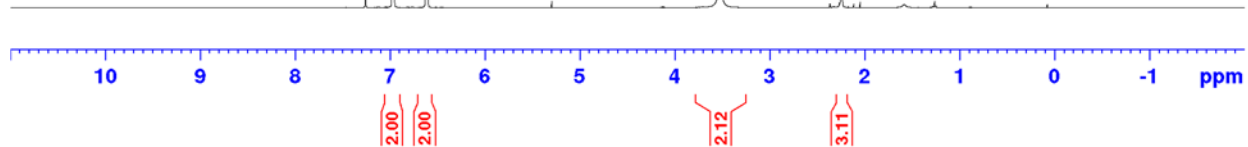

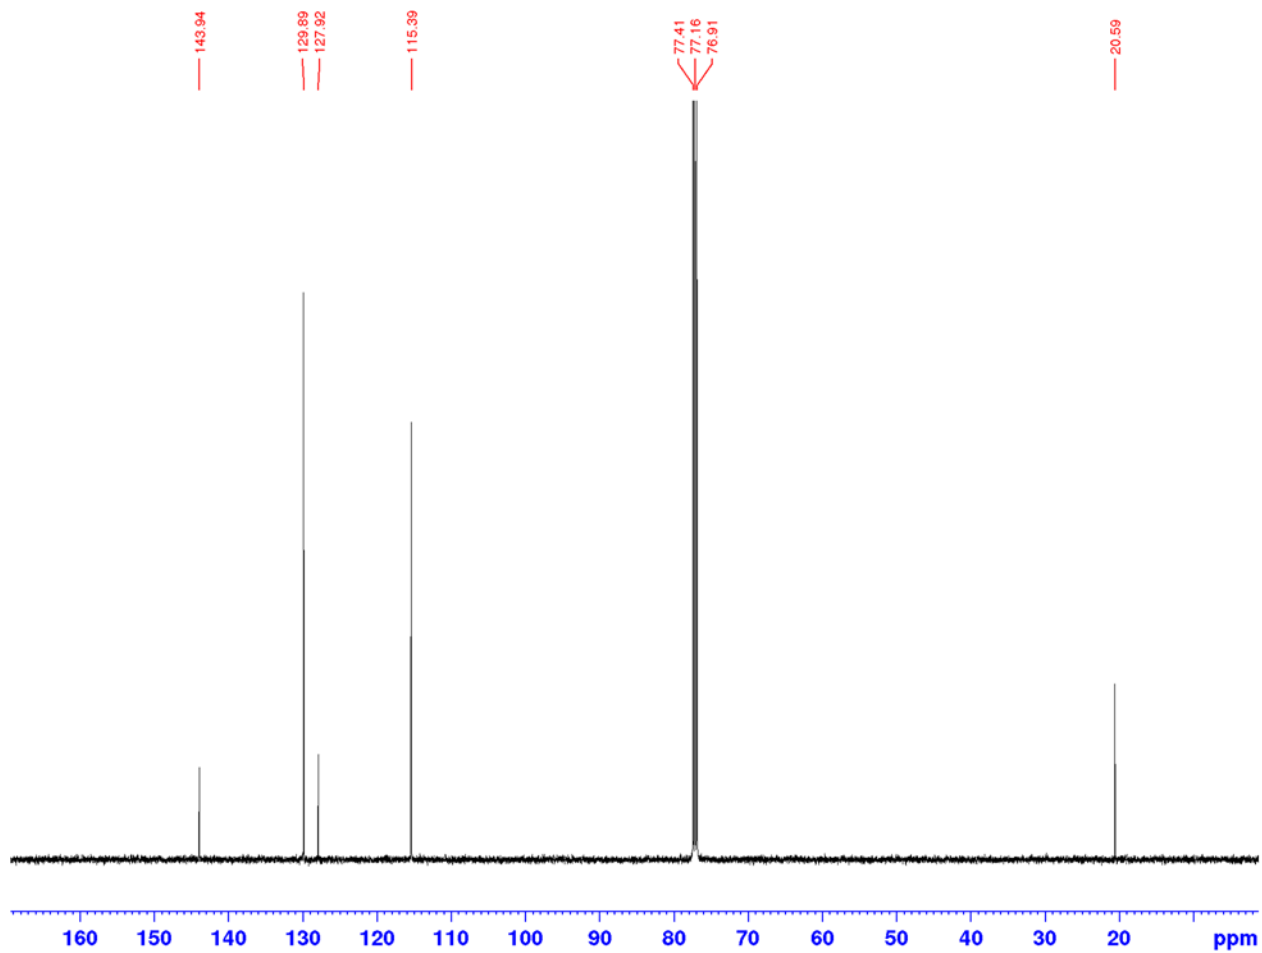

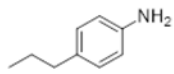

3e

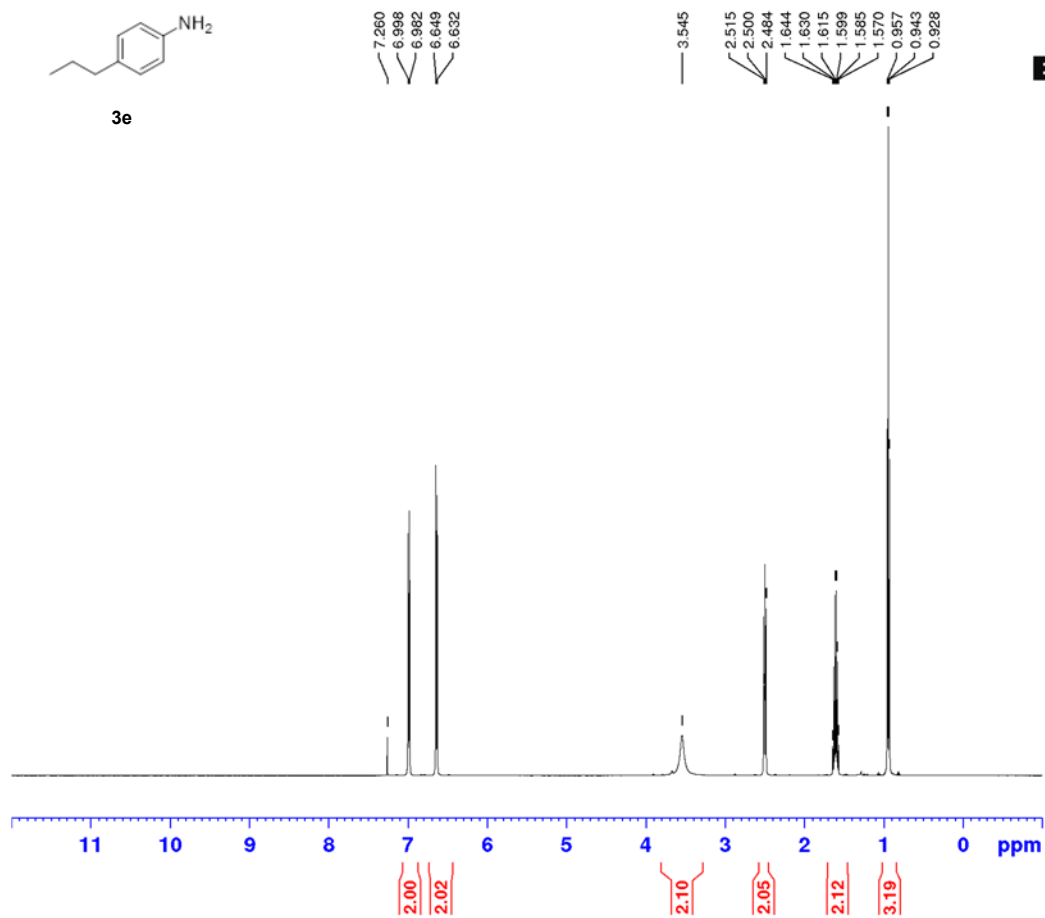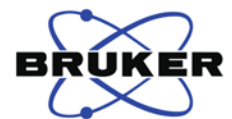

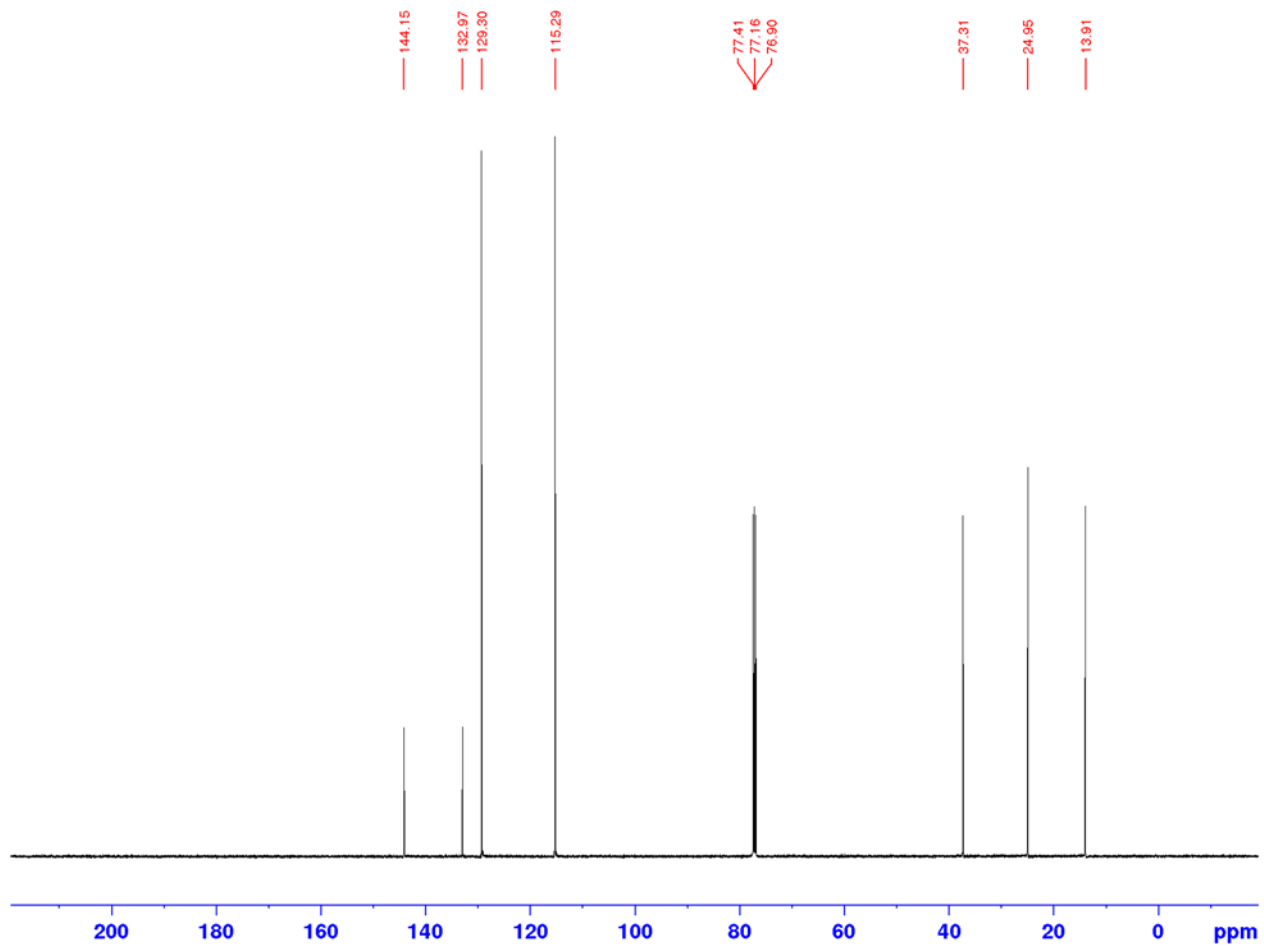

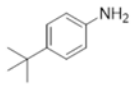

3f

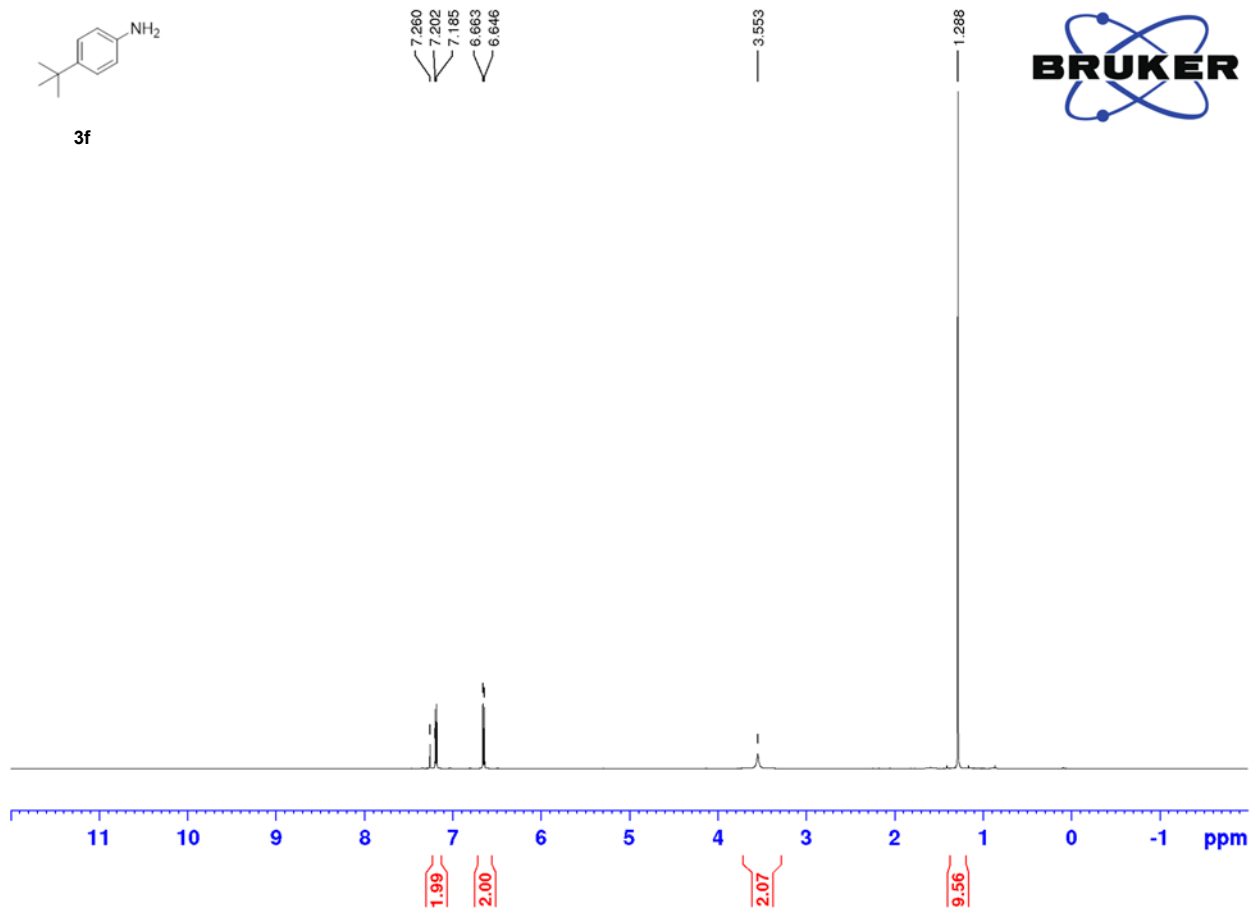



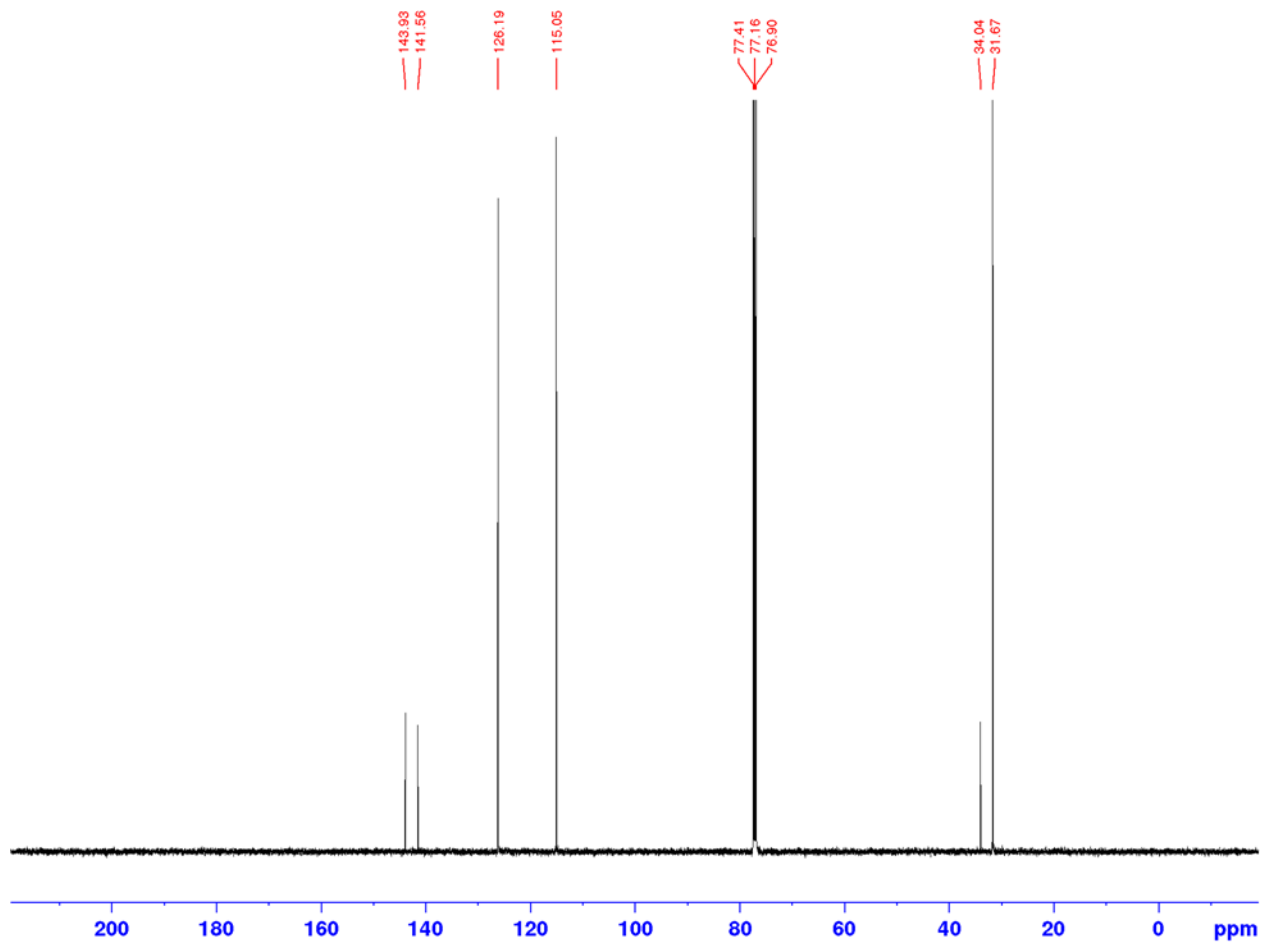

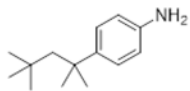

3g

7.260  
7.167  
7.150  
6.645  
6.628

3.539

1.686

1.333

0.737

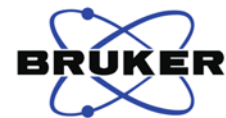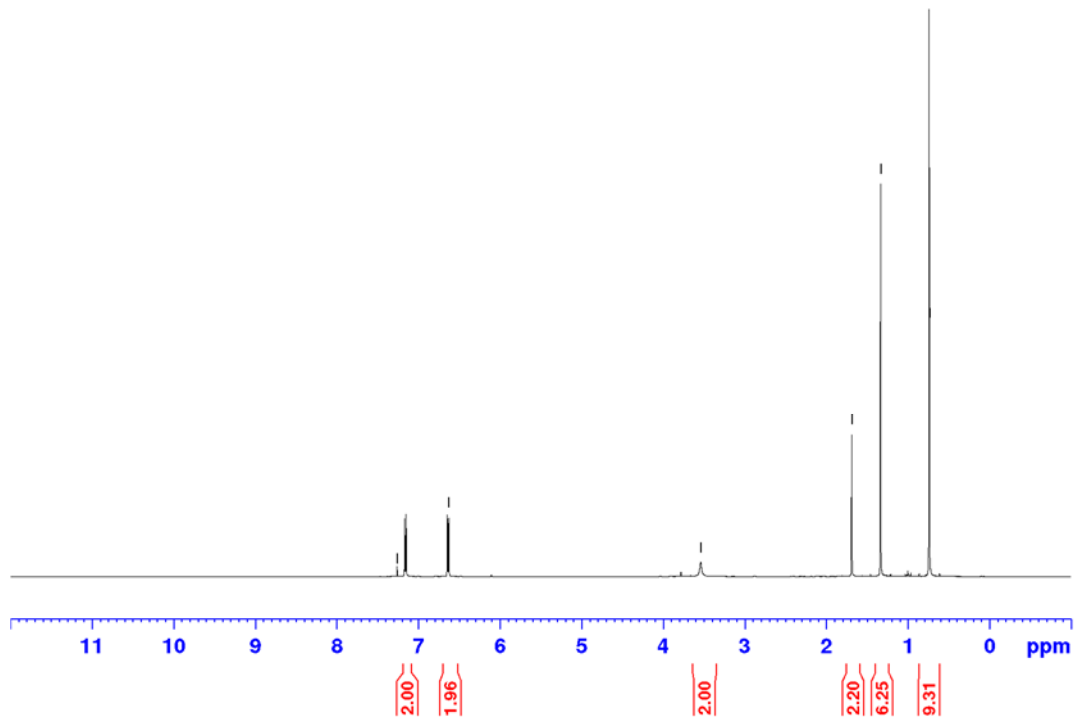

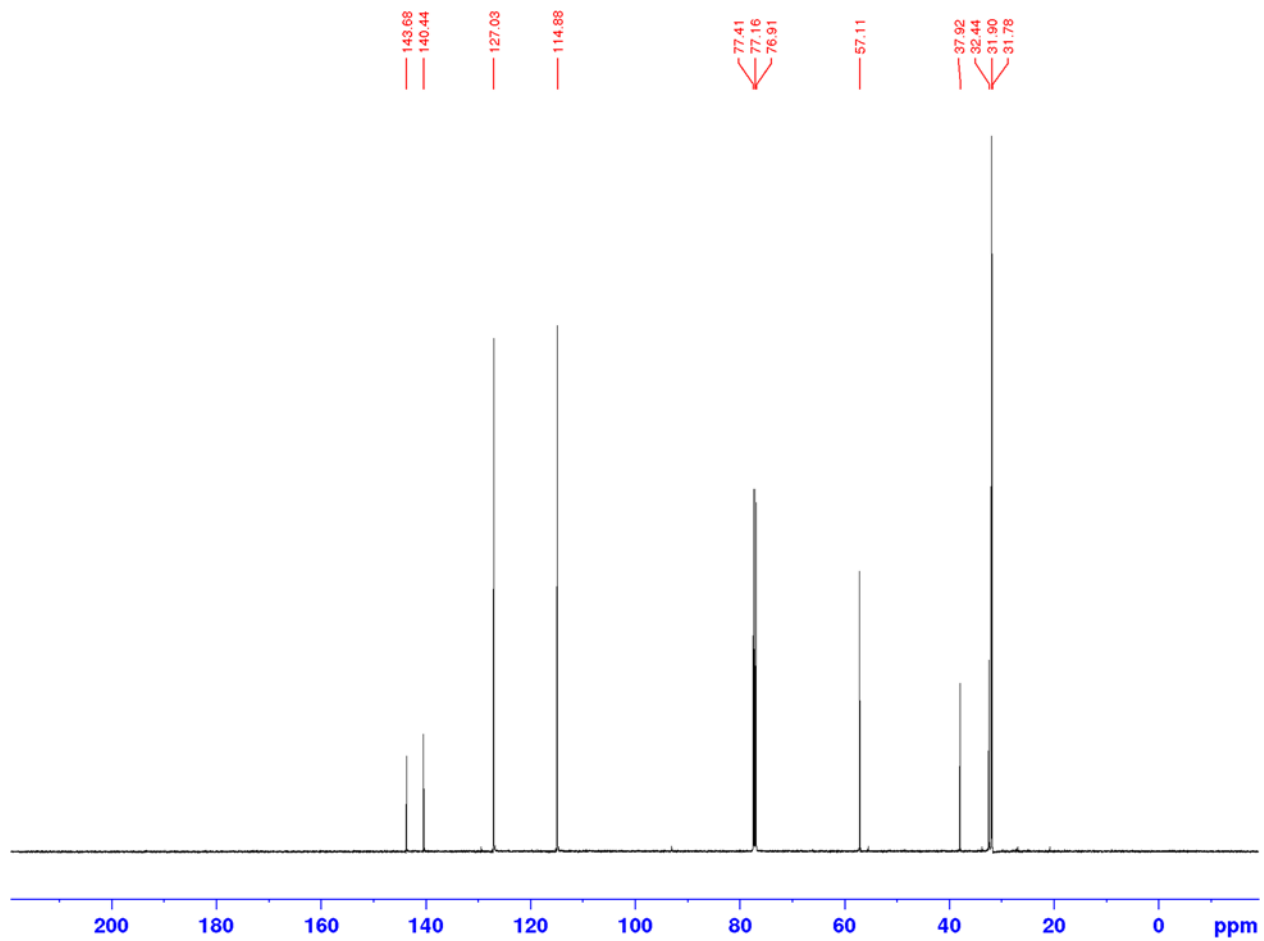

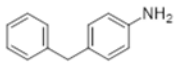

3h

7.317  
7.302  
7.287  
7.260  
7.223  
7.215  
7.210  
7.199  
7.018  
7.001  
6.655  
6.638

3.909  
3.565

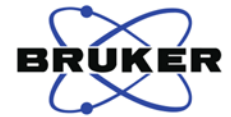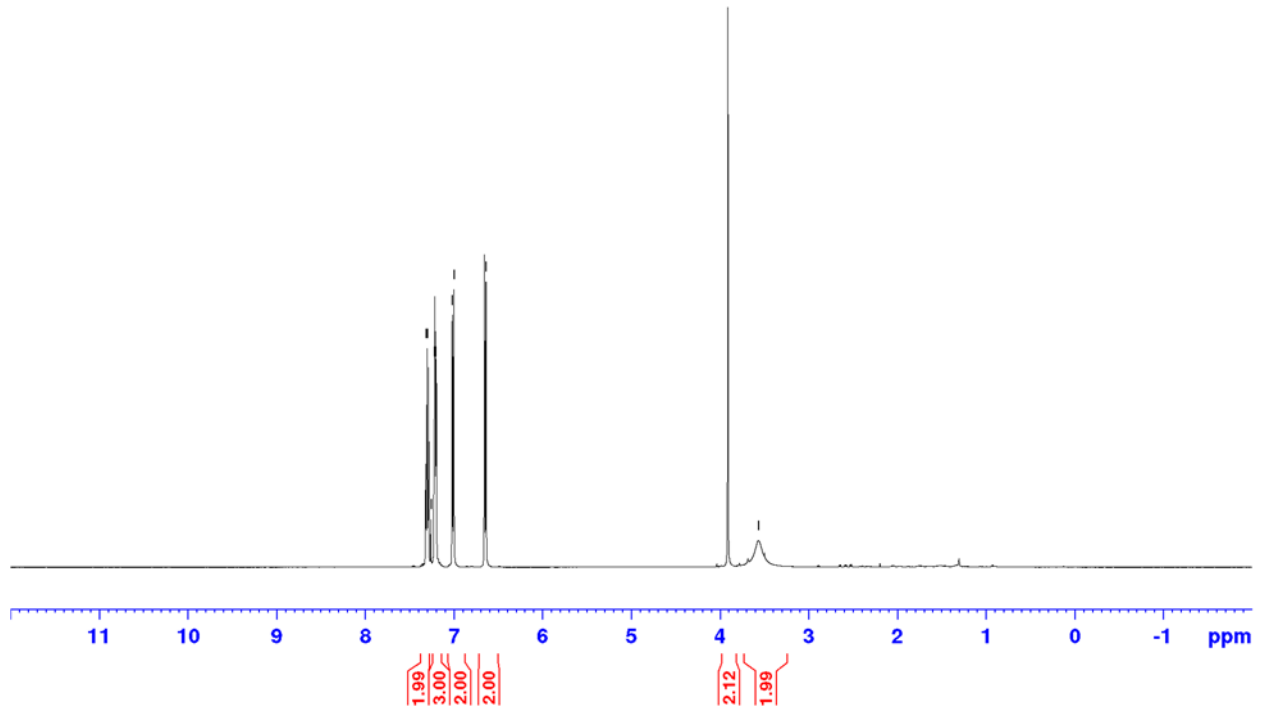

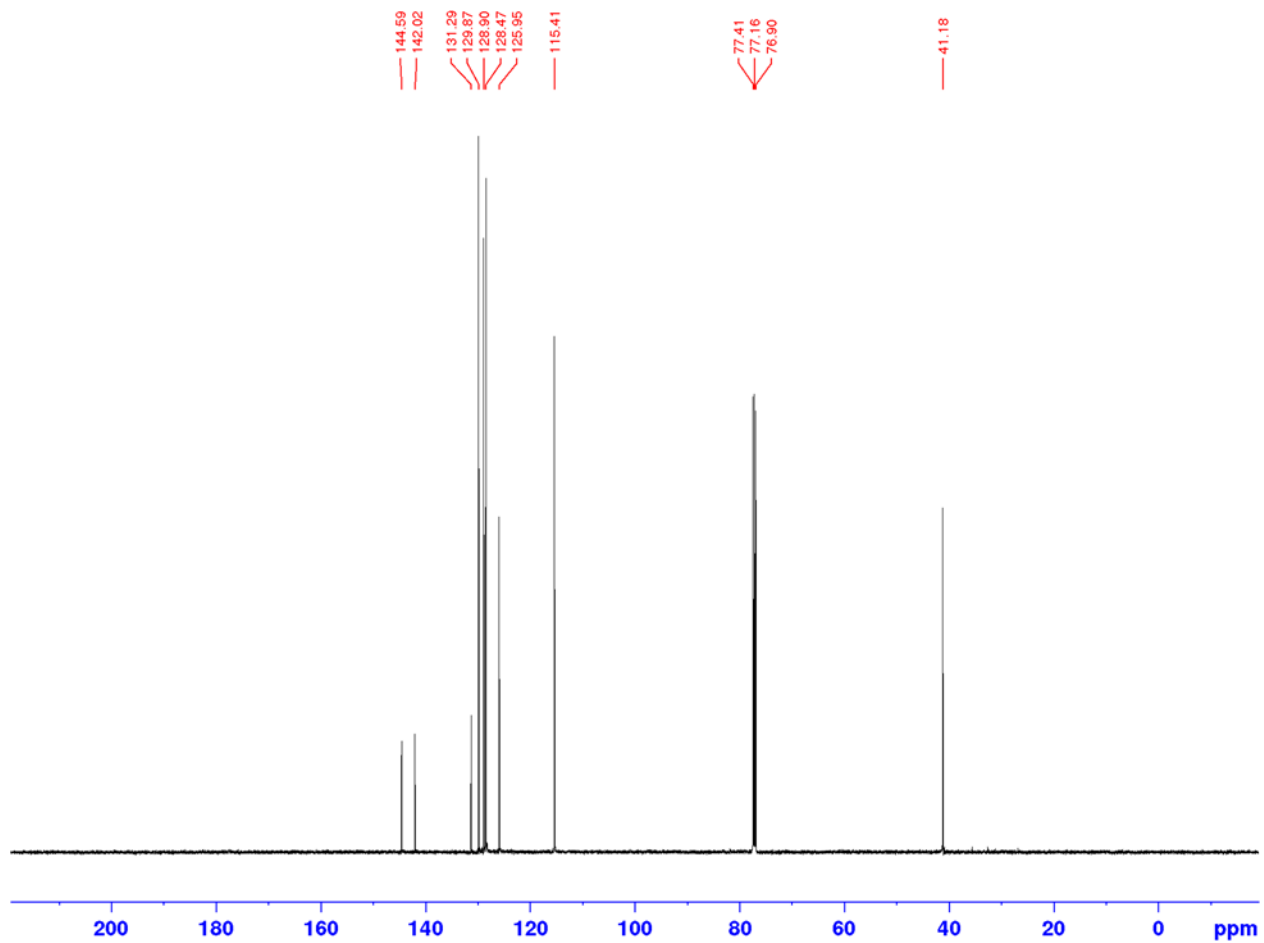

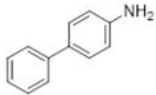

3i

7.559  
7.556  
7.553  
7.542  
7.540  
7.439  
7.435  
7.426  
7.422  
7.407  
7.391  
7.297  
7.295  
7.293  
7.280  
7.268  
7.266  
7.263  
7.260  
6.776  
6.759

— 3.725

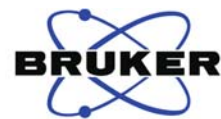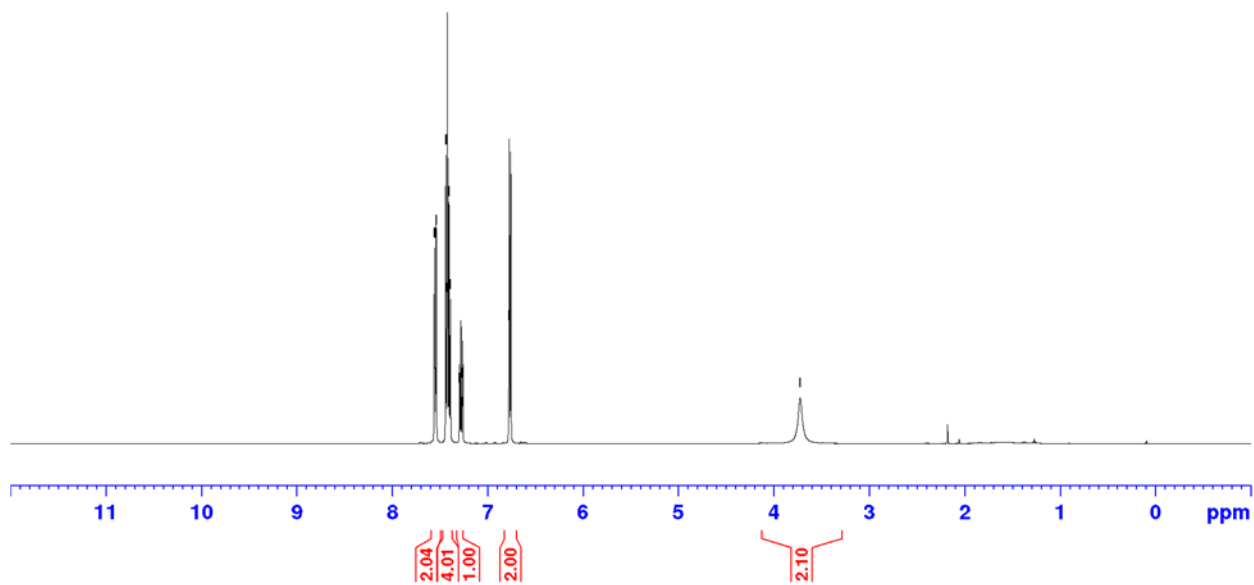

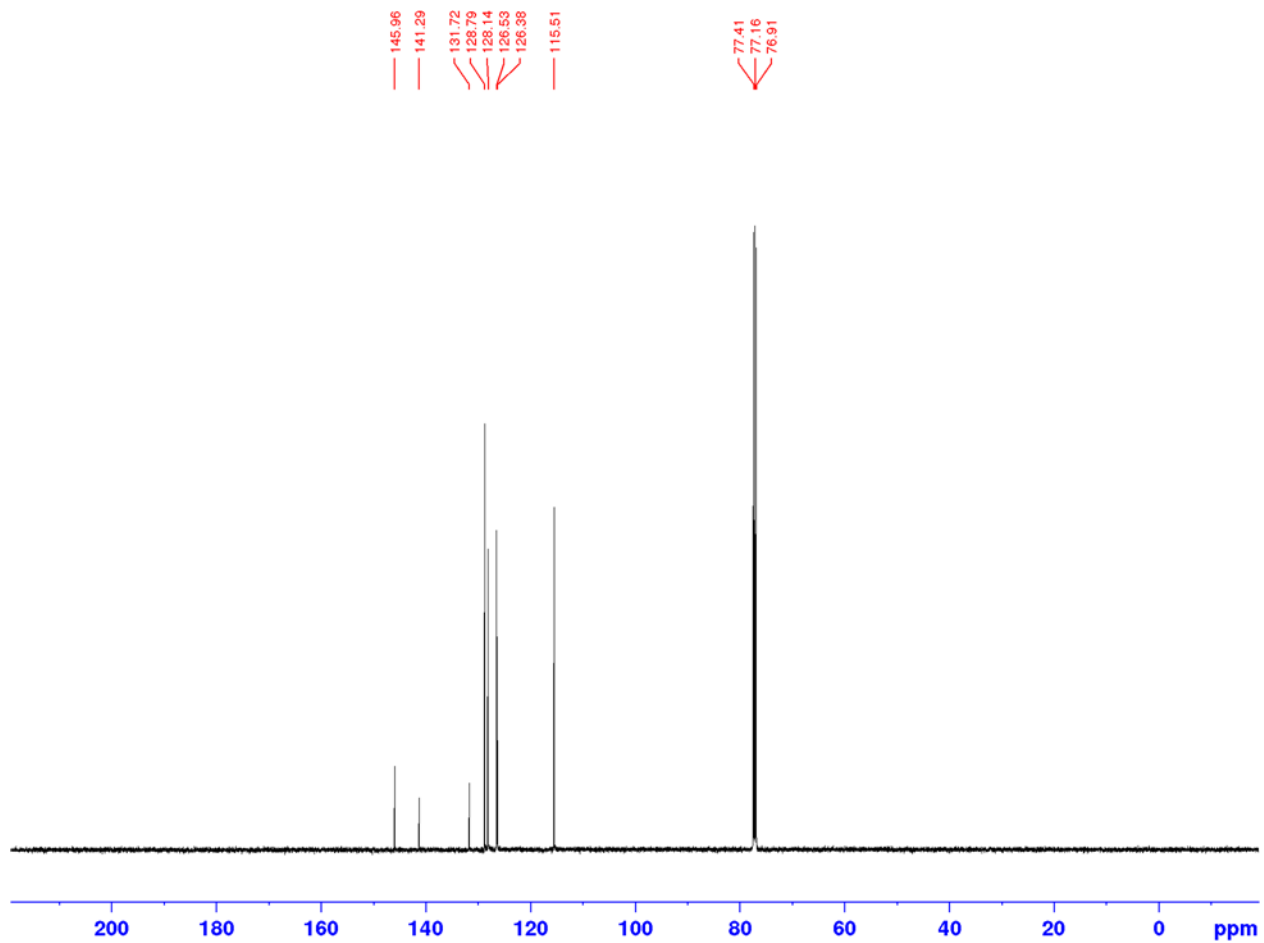

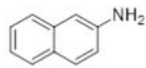

3j

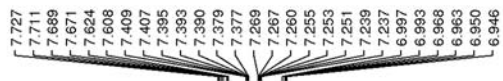

— 3.836

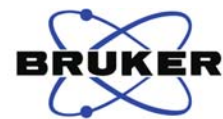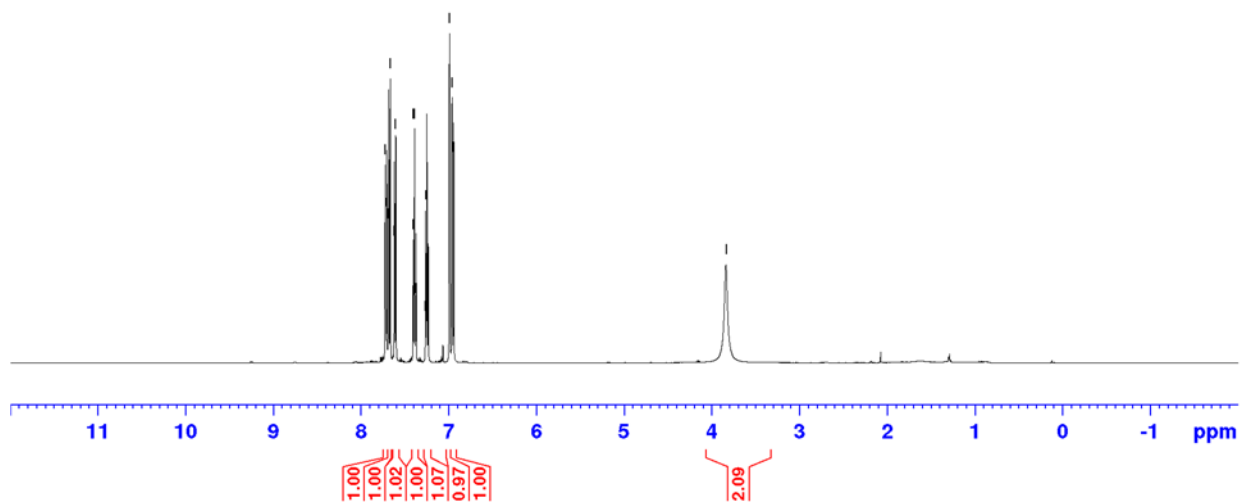



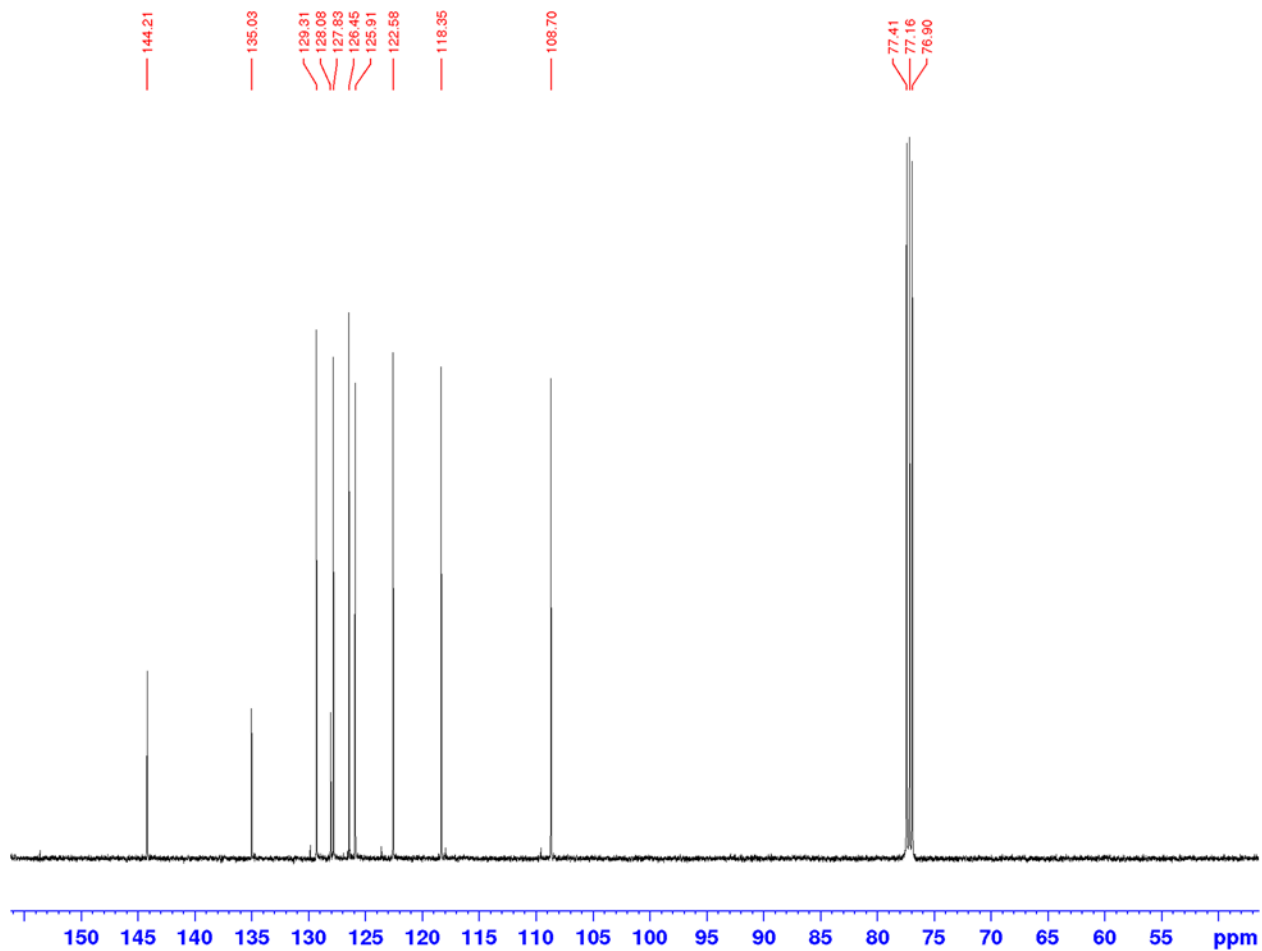

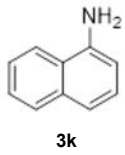

7.840  
7.829  
7.820  
7.813  
7.810  
7.495  
7.480  
7.477  
7.471  
7.464  
7.462  
7.451  
7.447  
7.346  
7.330  
7.319  
7.305  
7.289  
7.280  
6.800  
6.789  
6.786

4.148

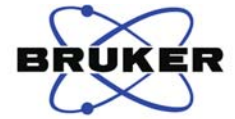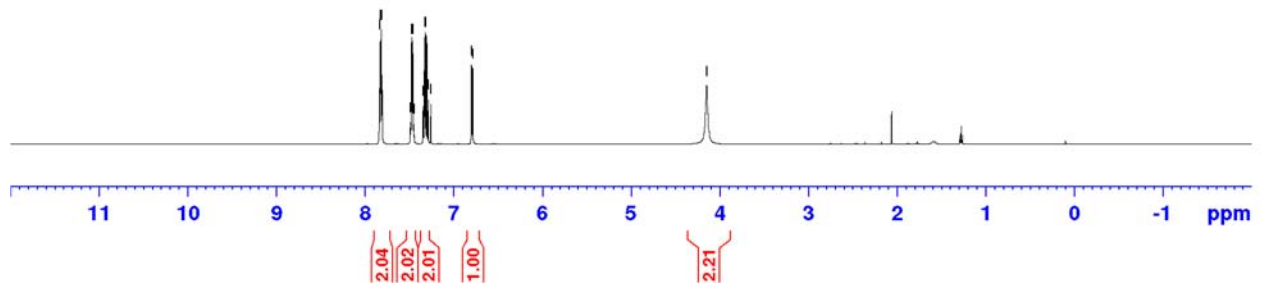

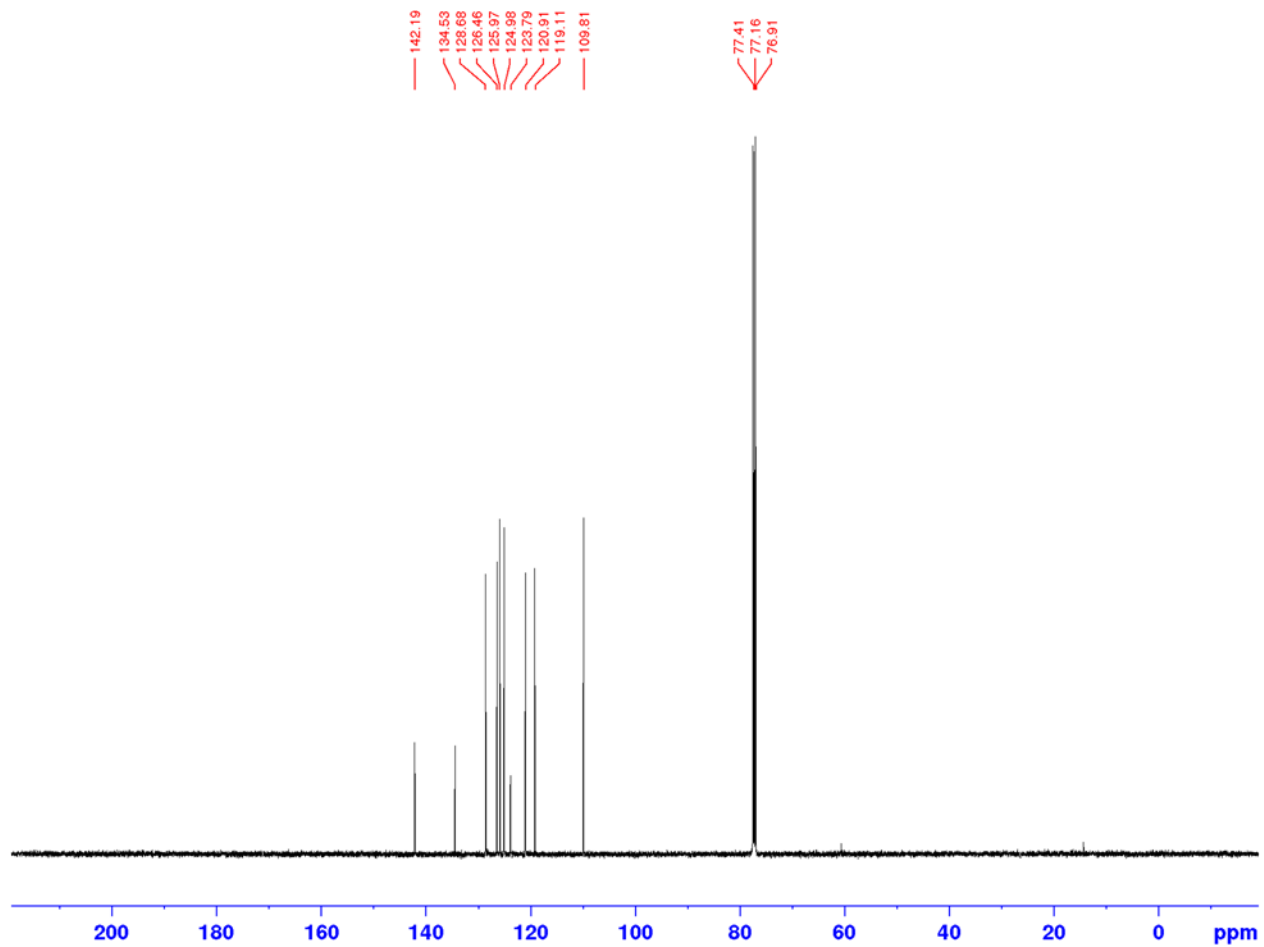

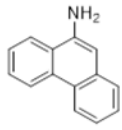

3l

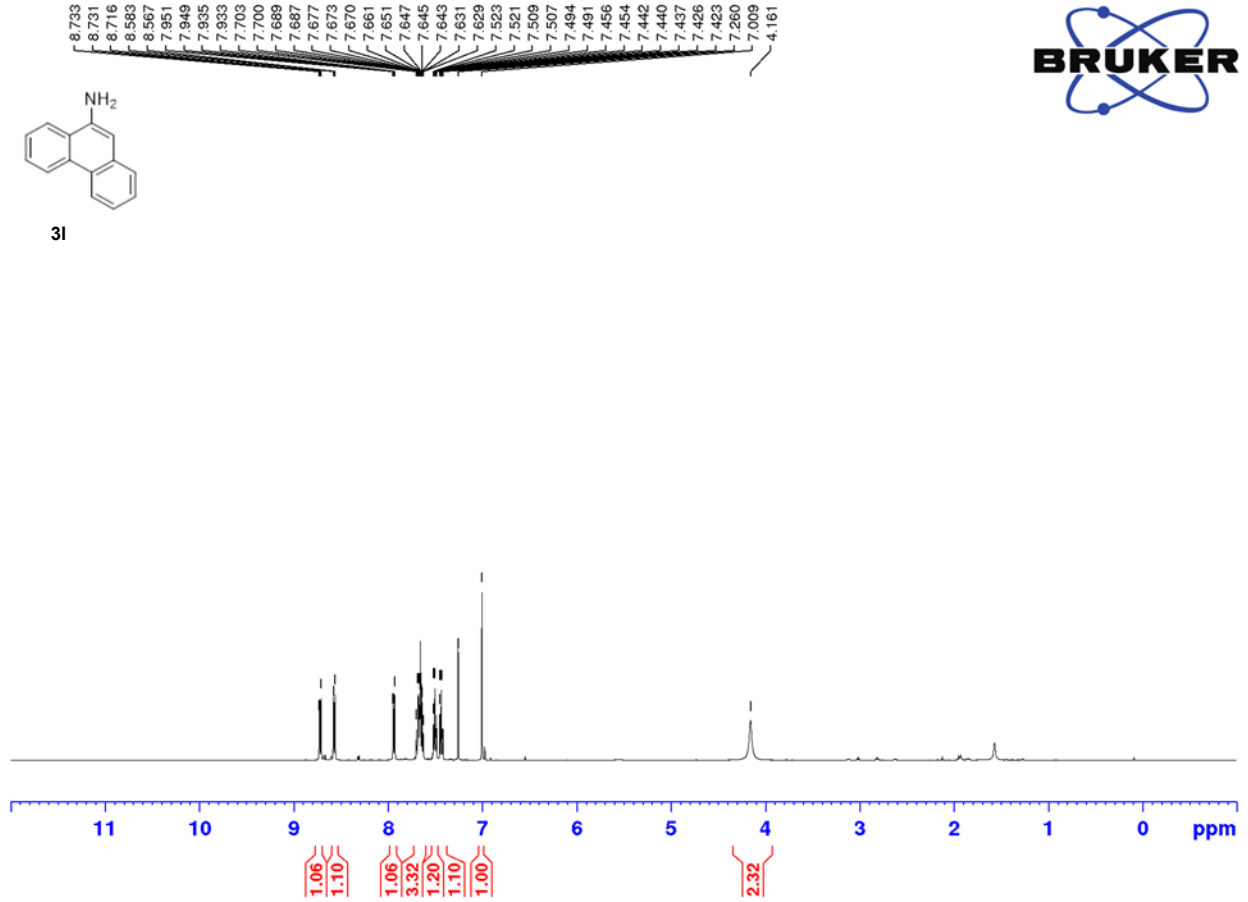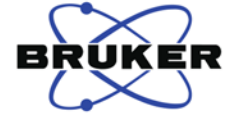

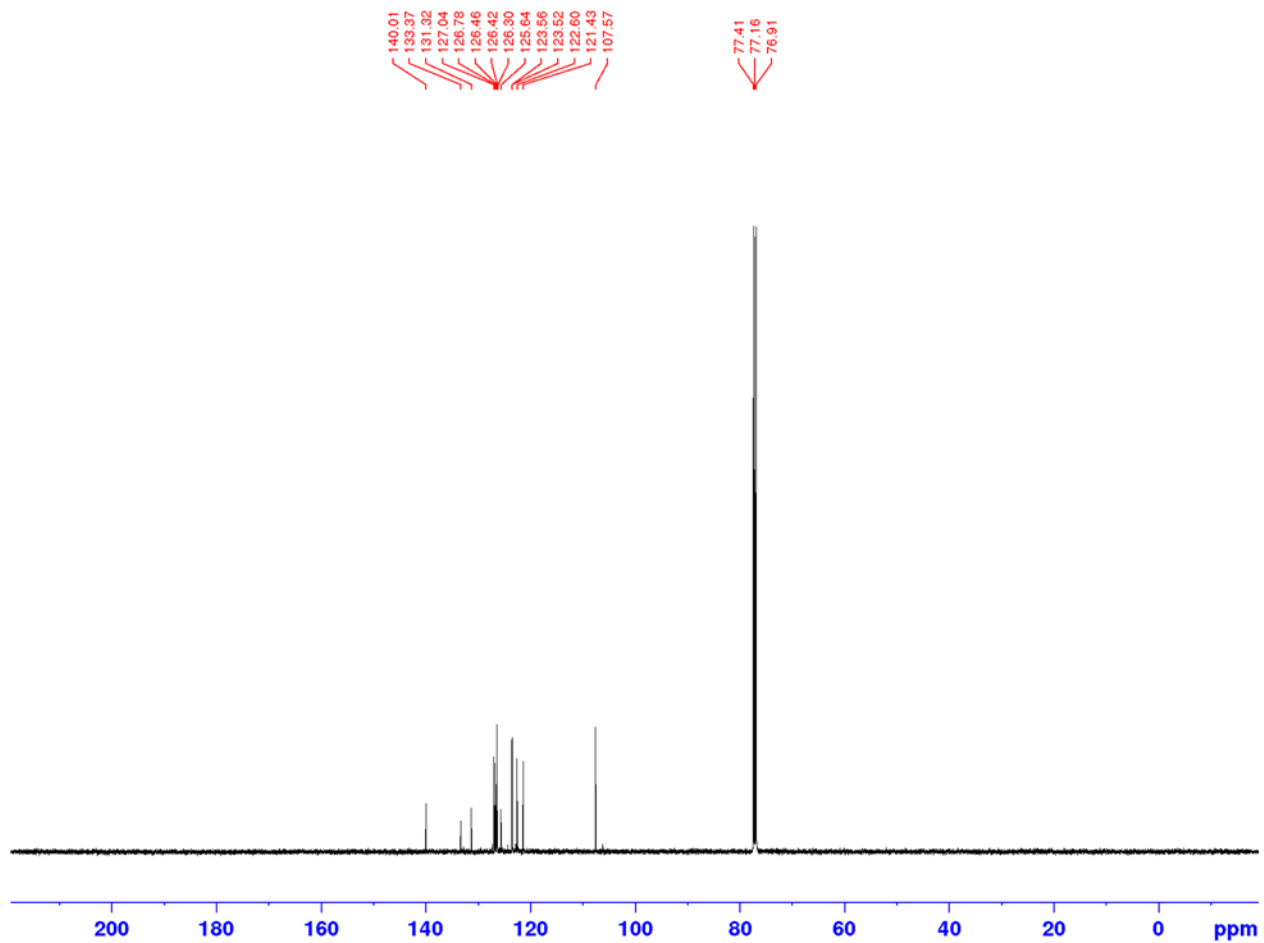

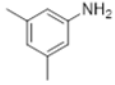

3m

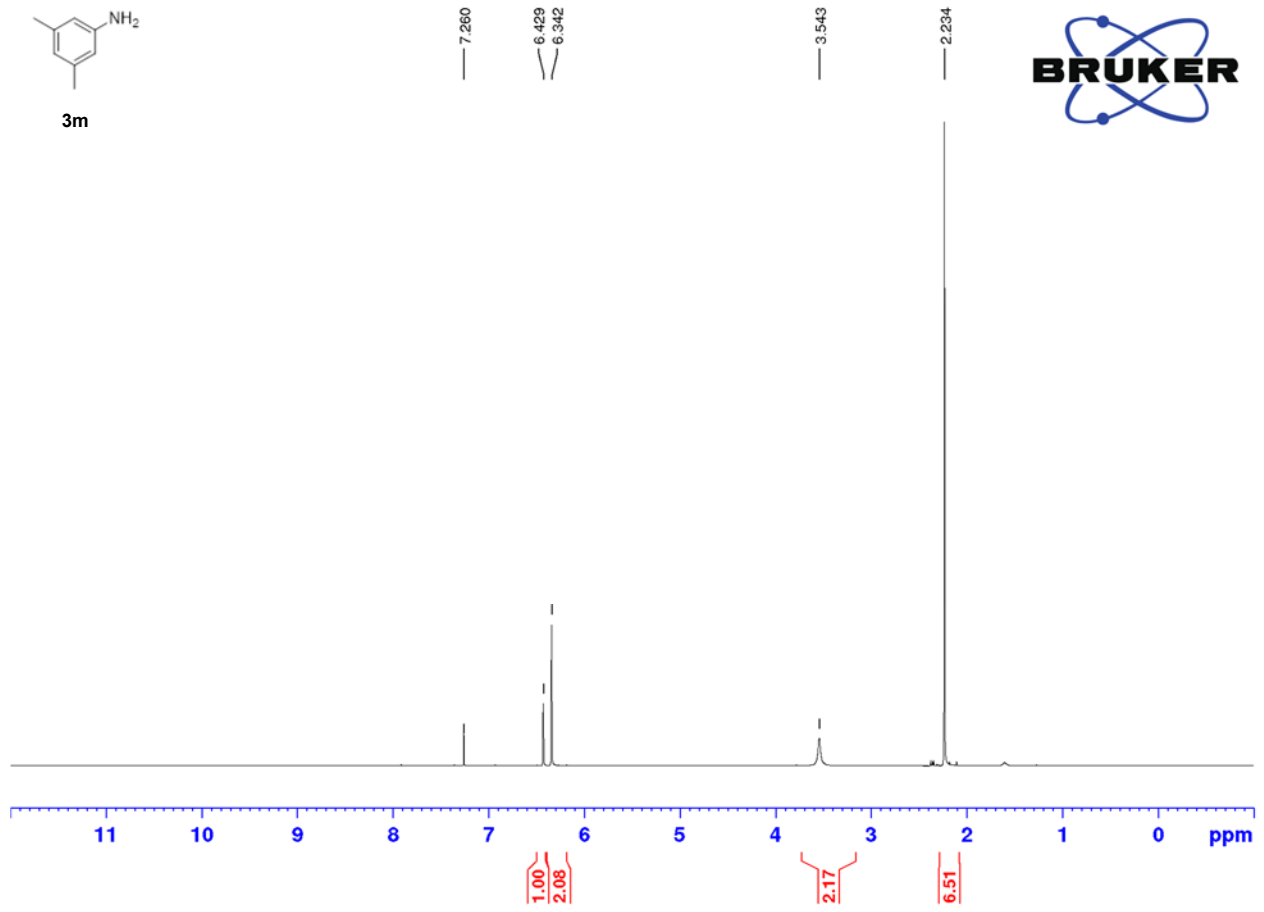

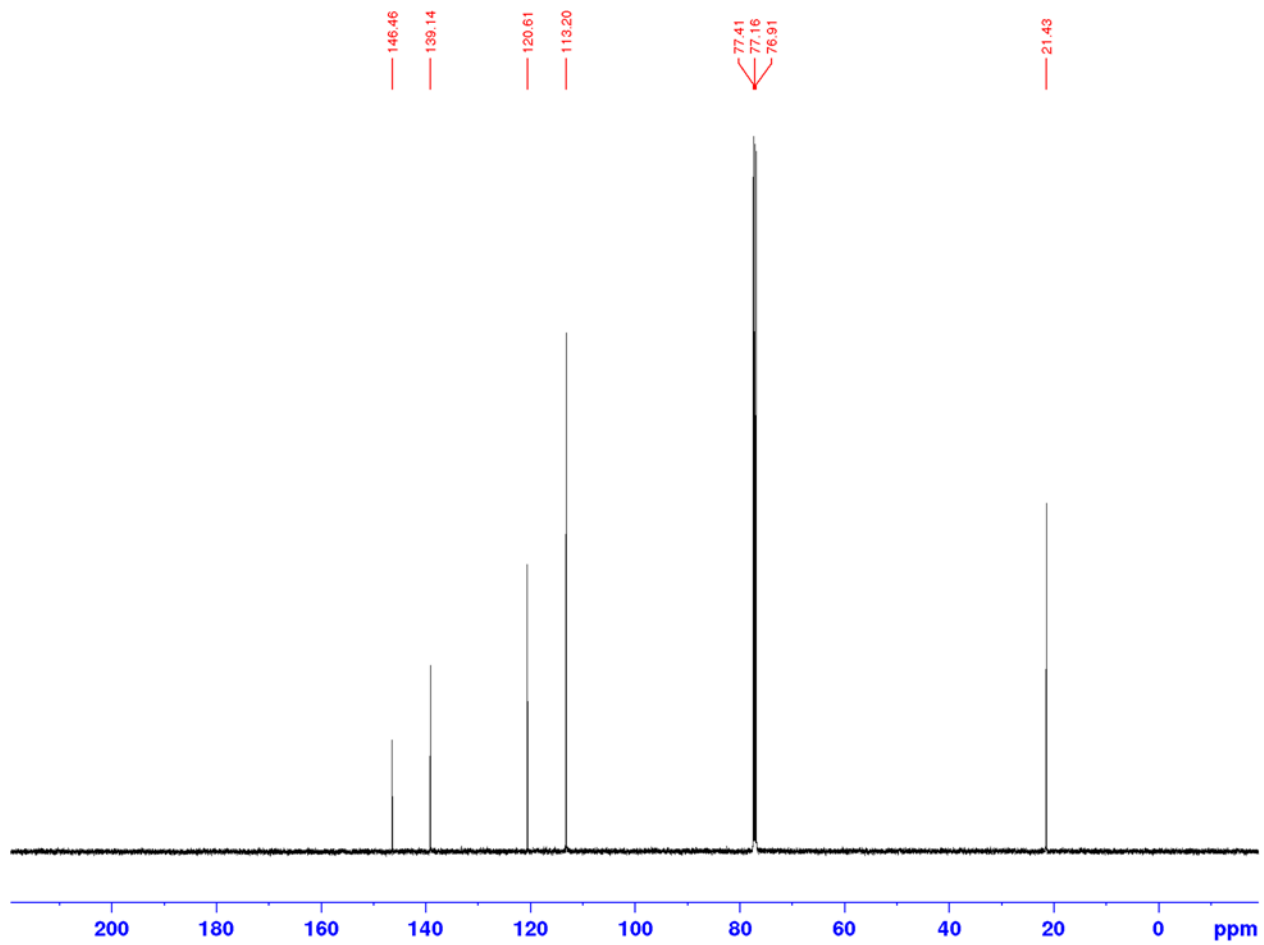

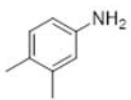

3n

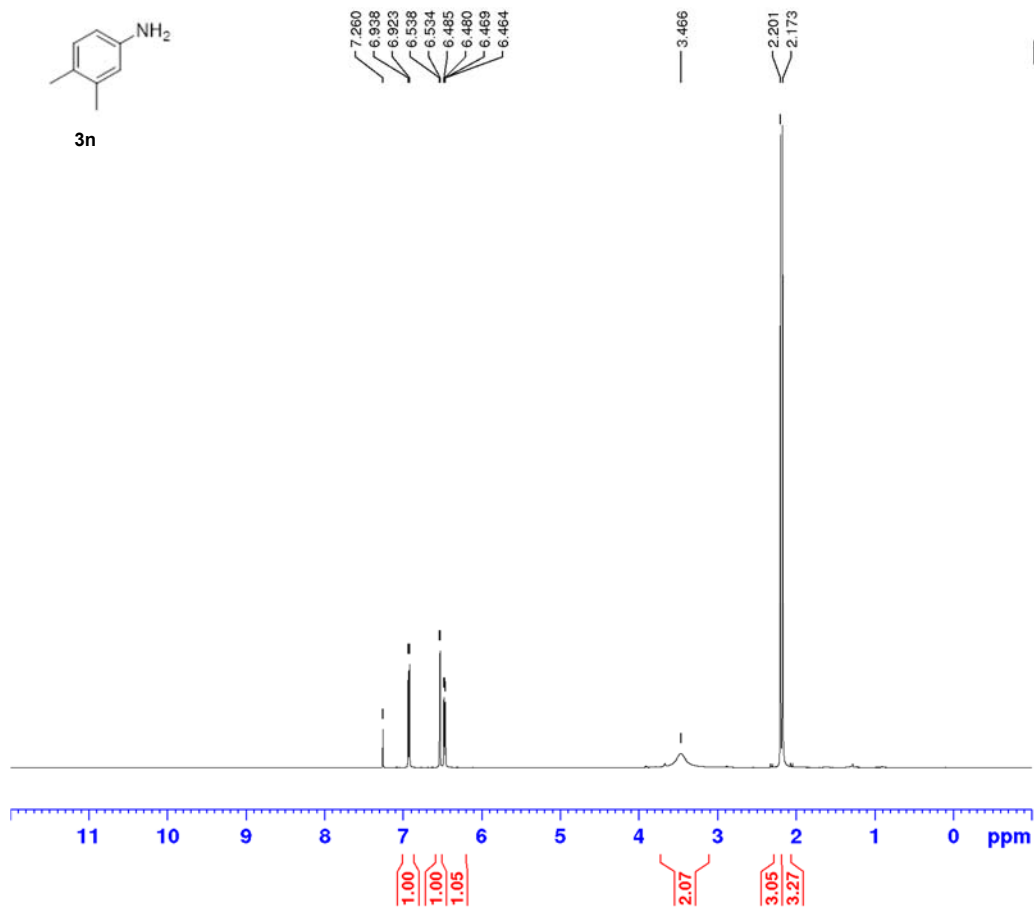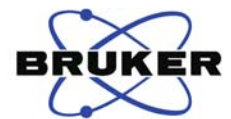



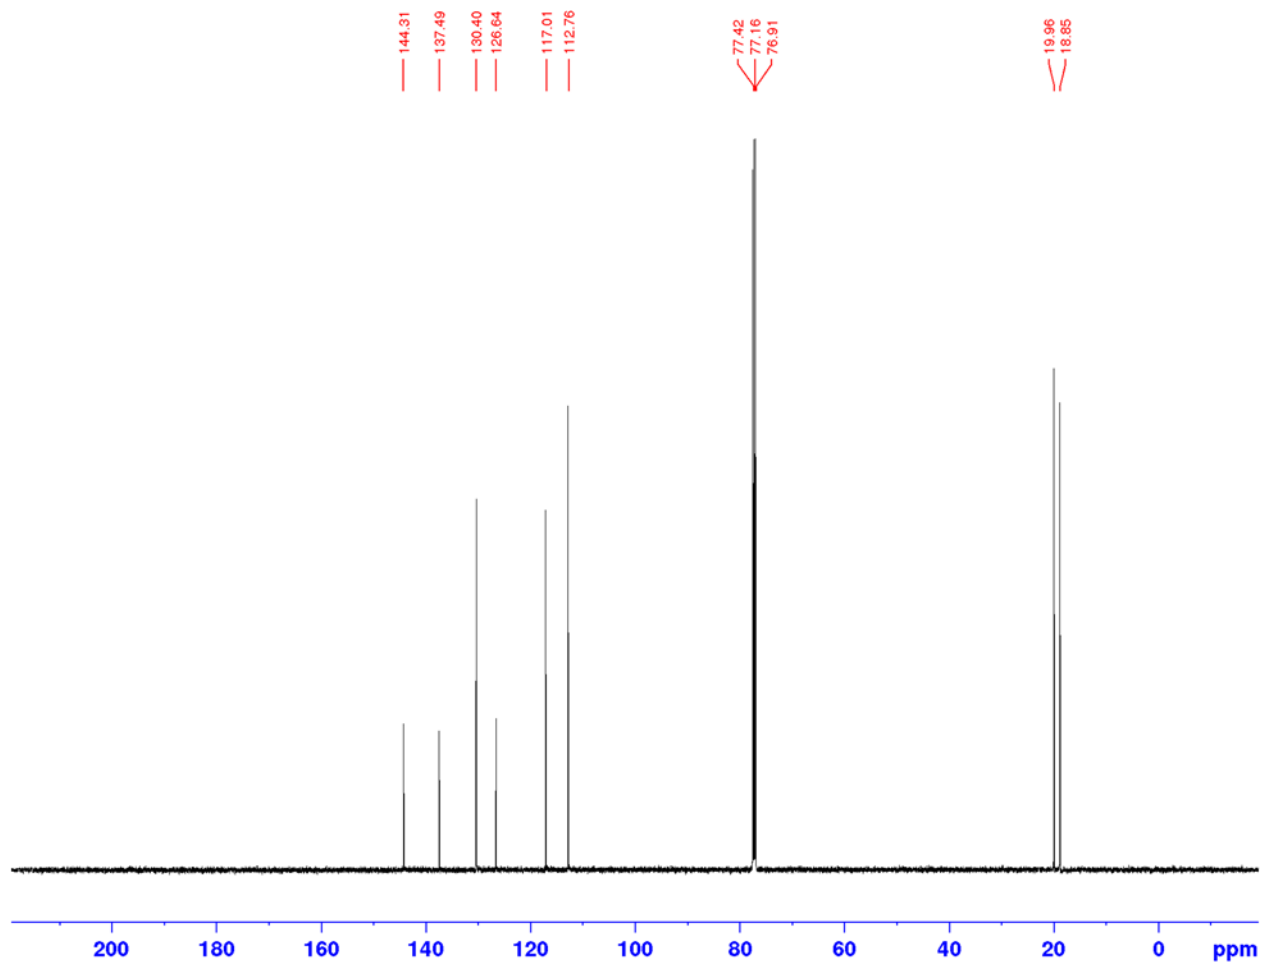

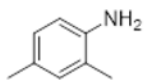

3o

6.891  
6.870  
6.854  
6.614  
6.598

3.401

2.244  
2.160

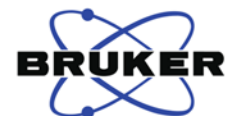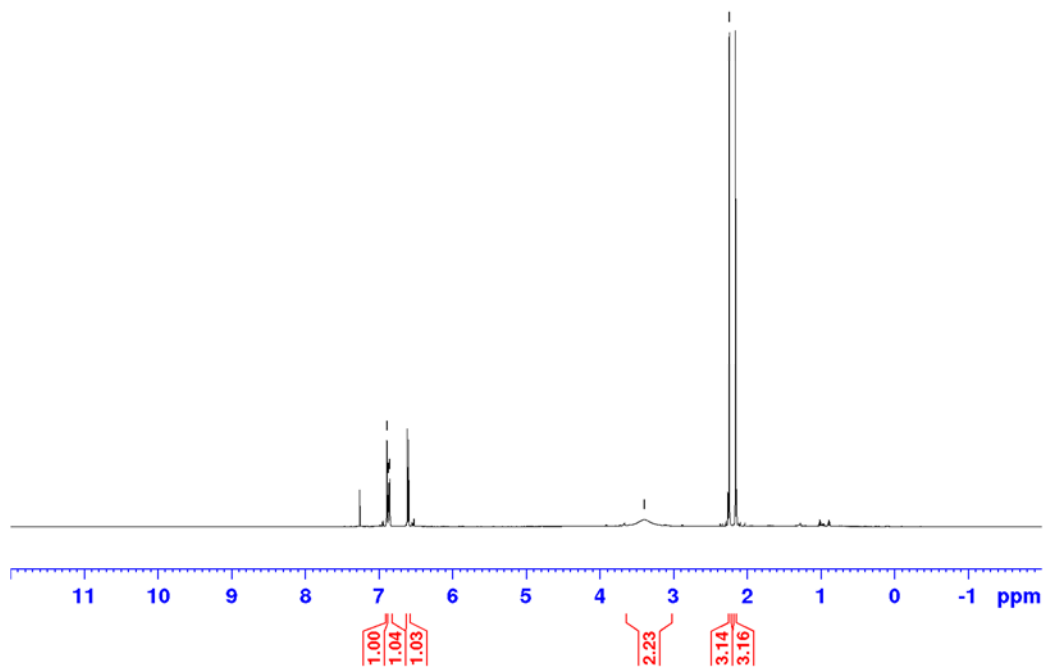

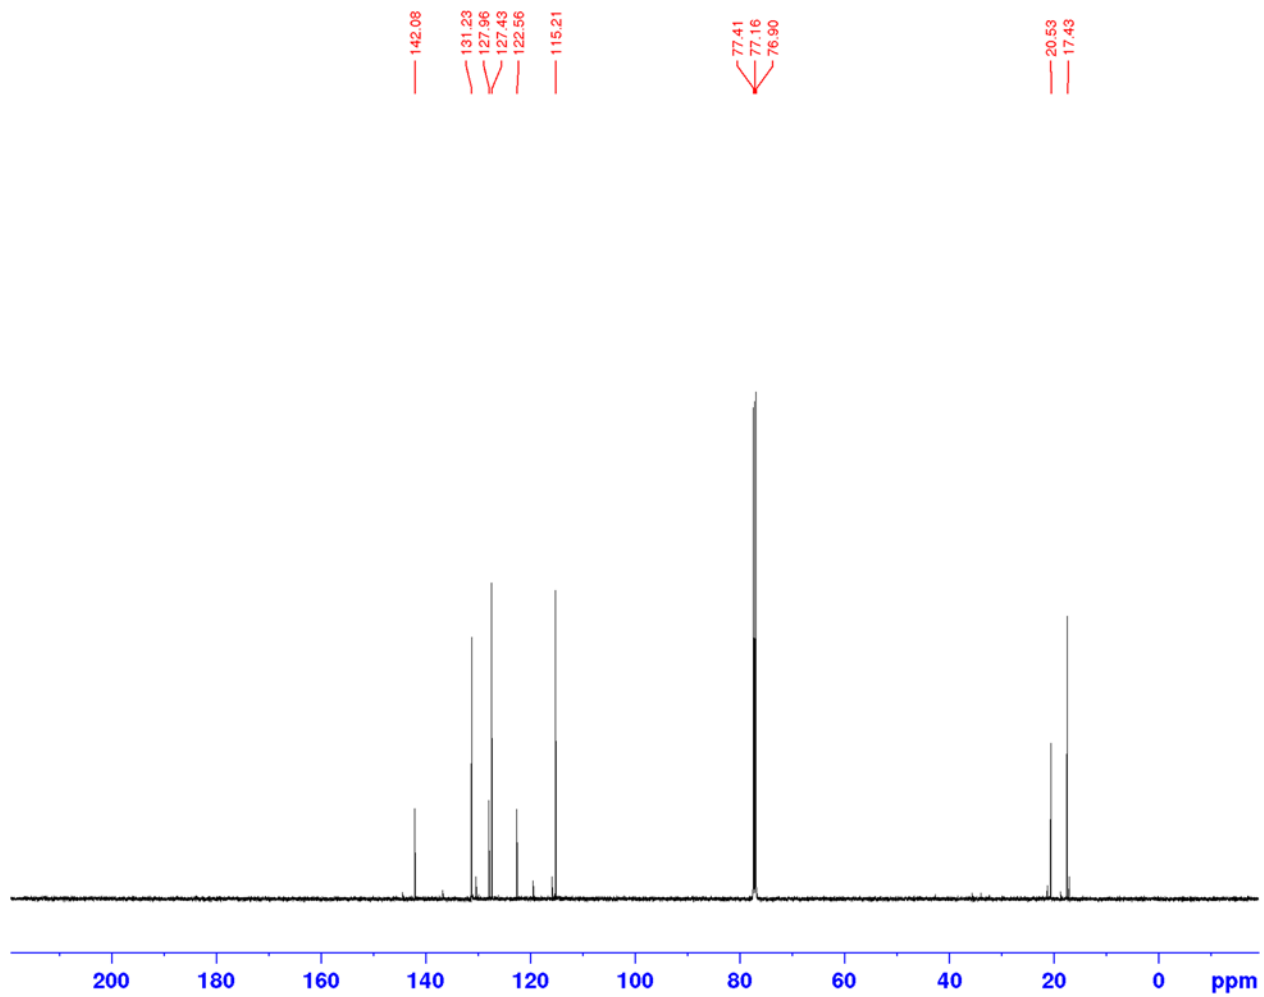

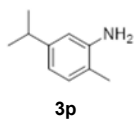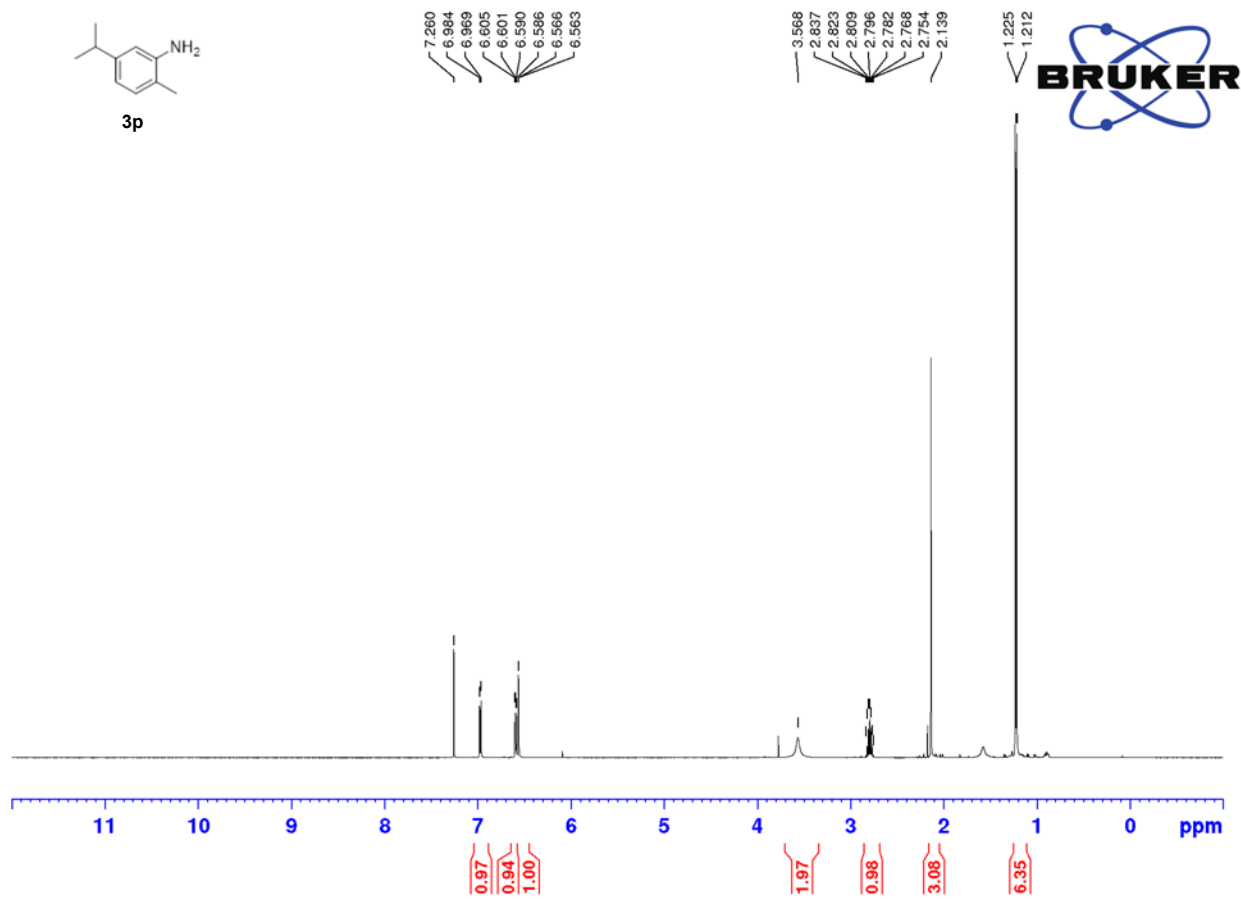

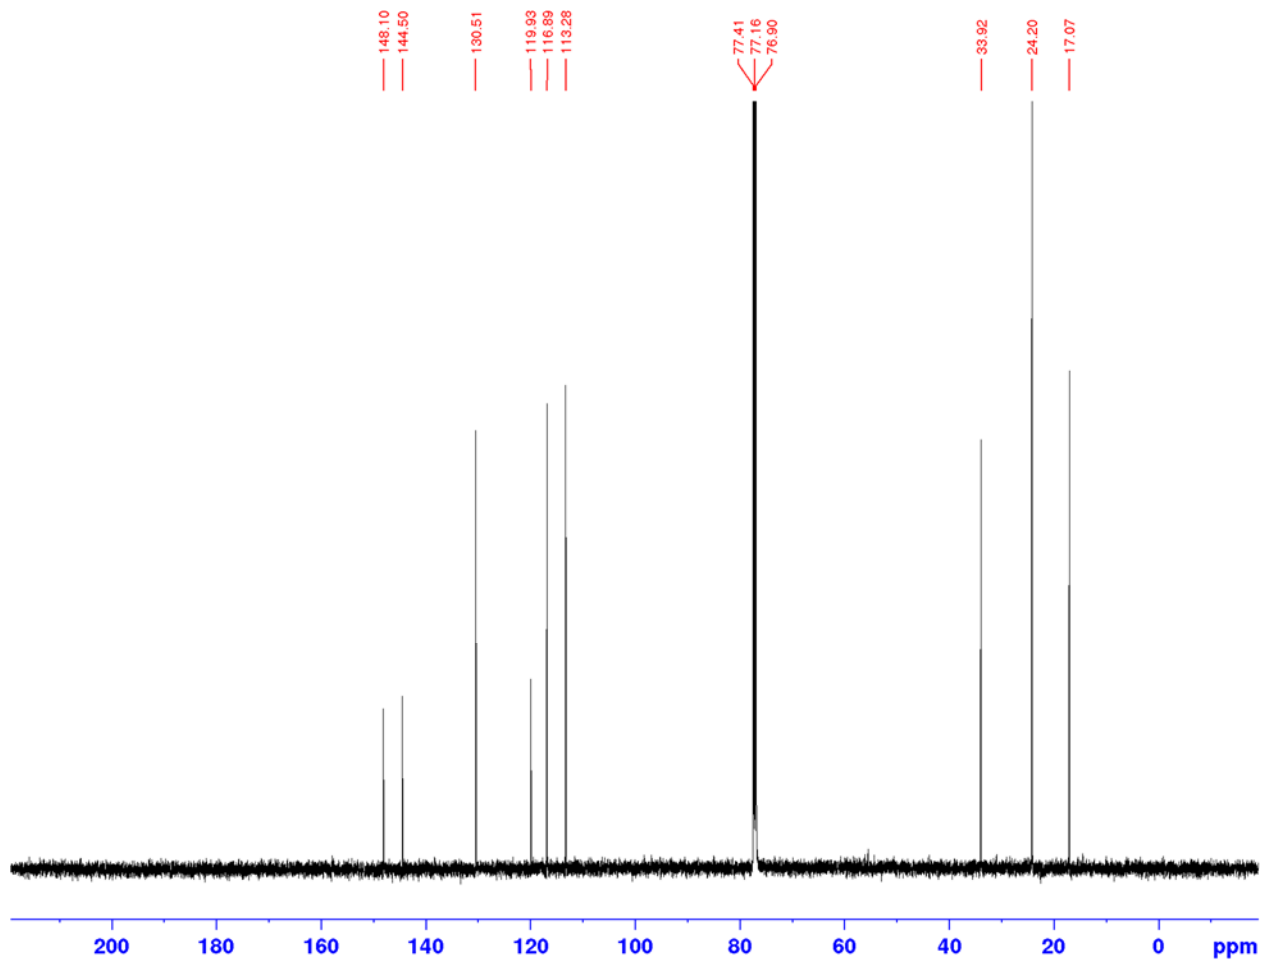

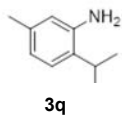

7.260  
7.038  
7.022  
6.617  
6.601  
6.520  
6.518

3.602  
2.913  
2.899  
2.886  
2.879  
2.872  
2.858  
2.845  
2.831  
2.244

1.254  
1.240

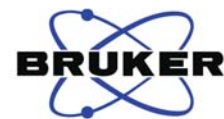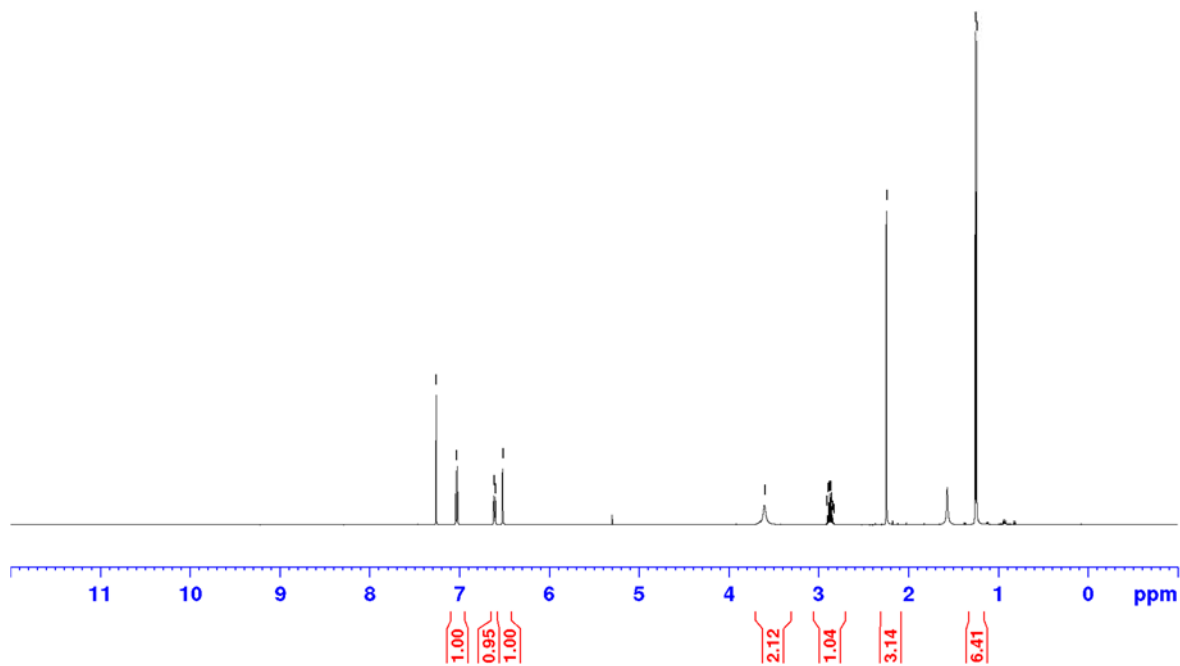

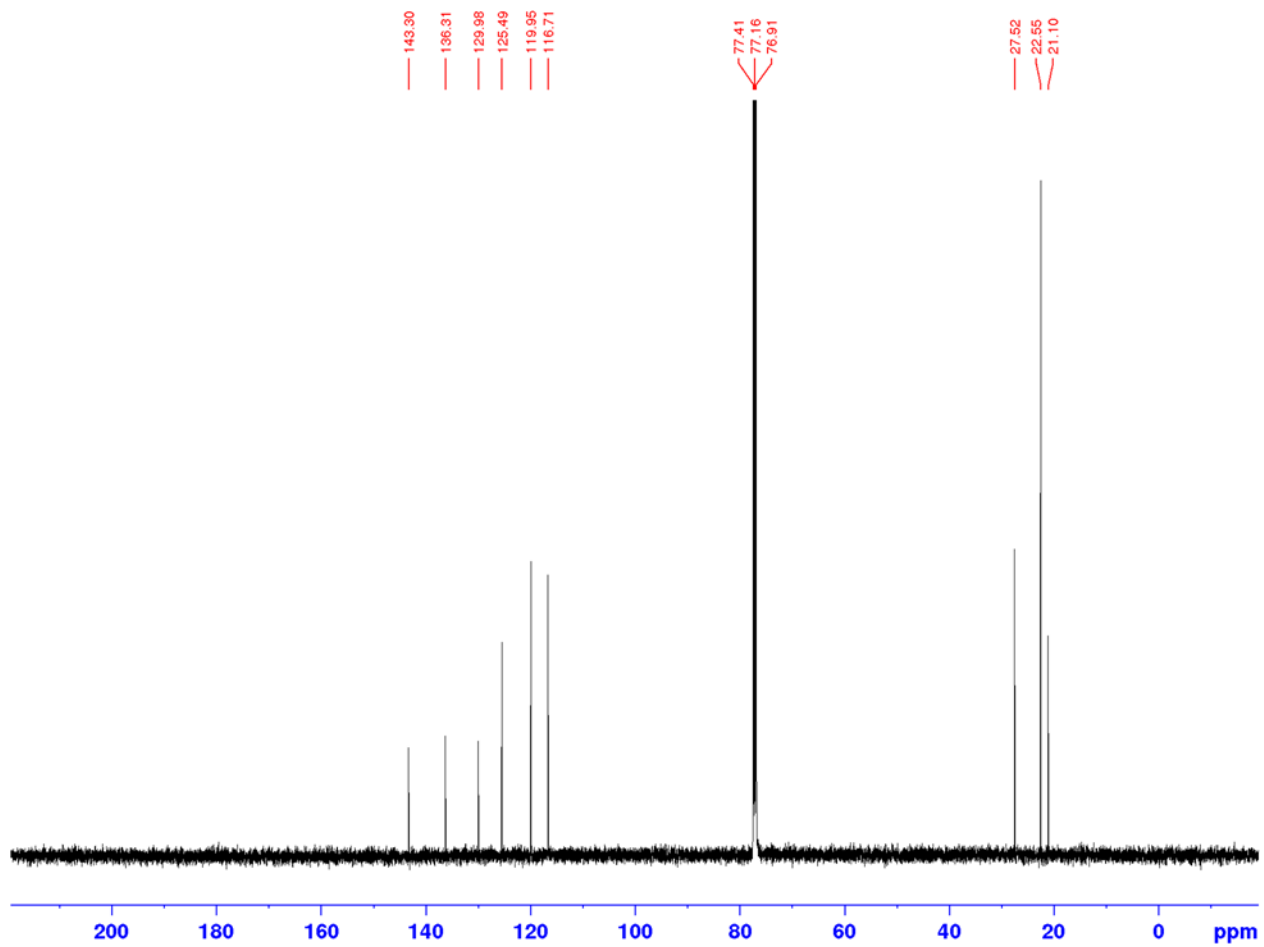

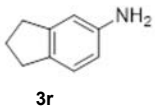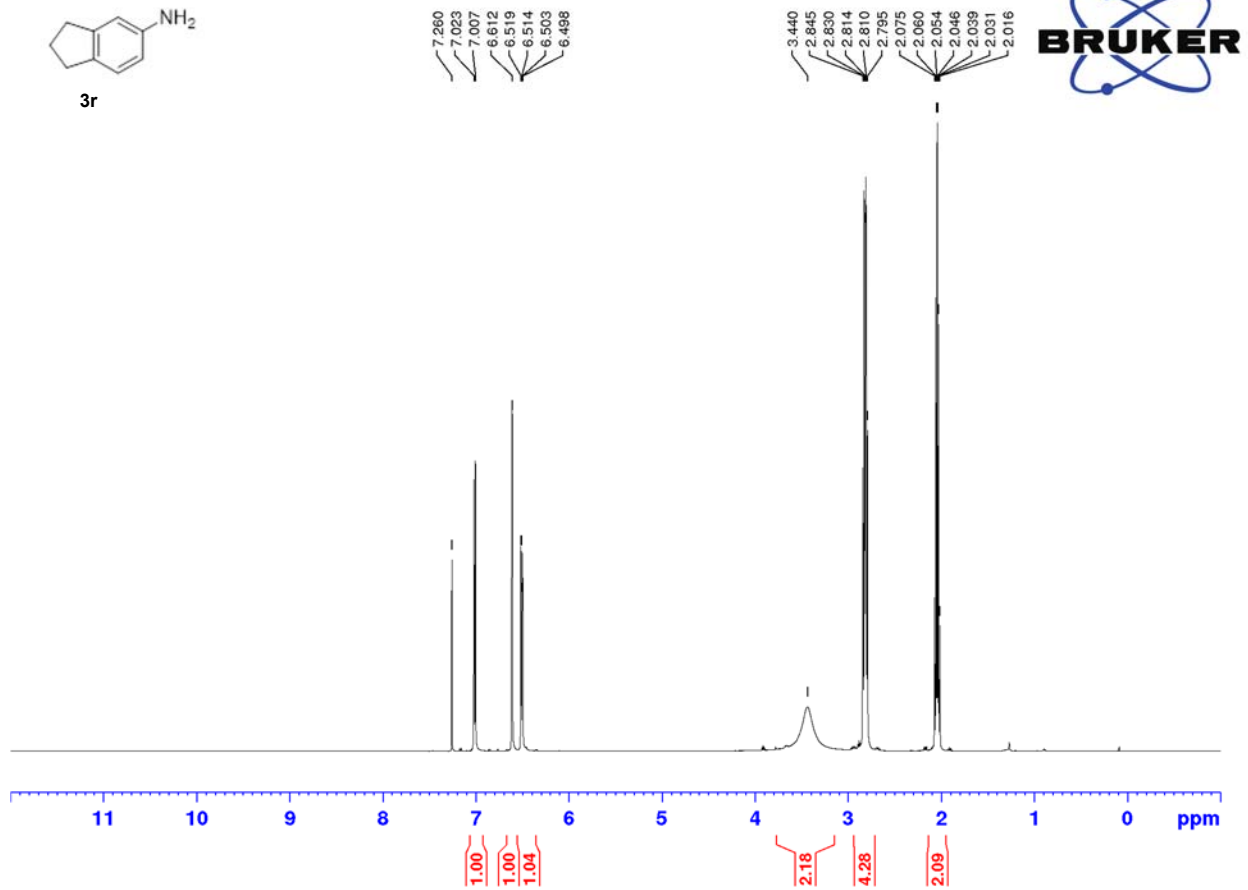



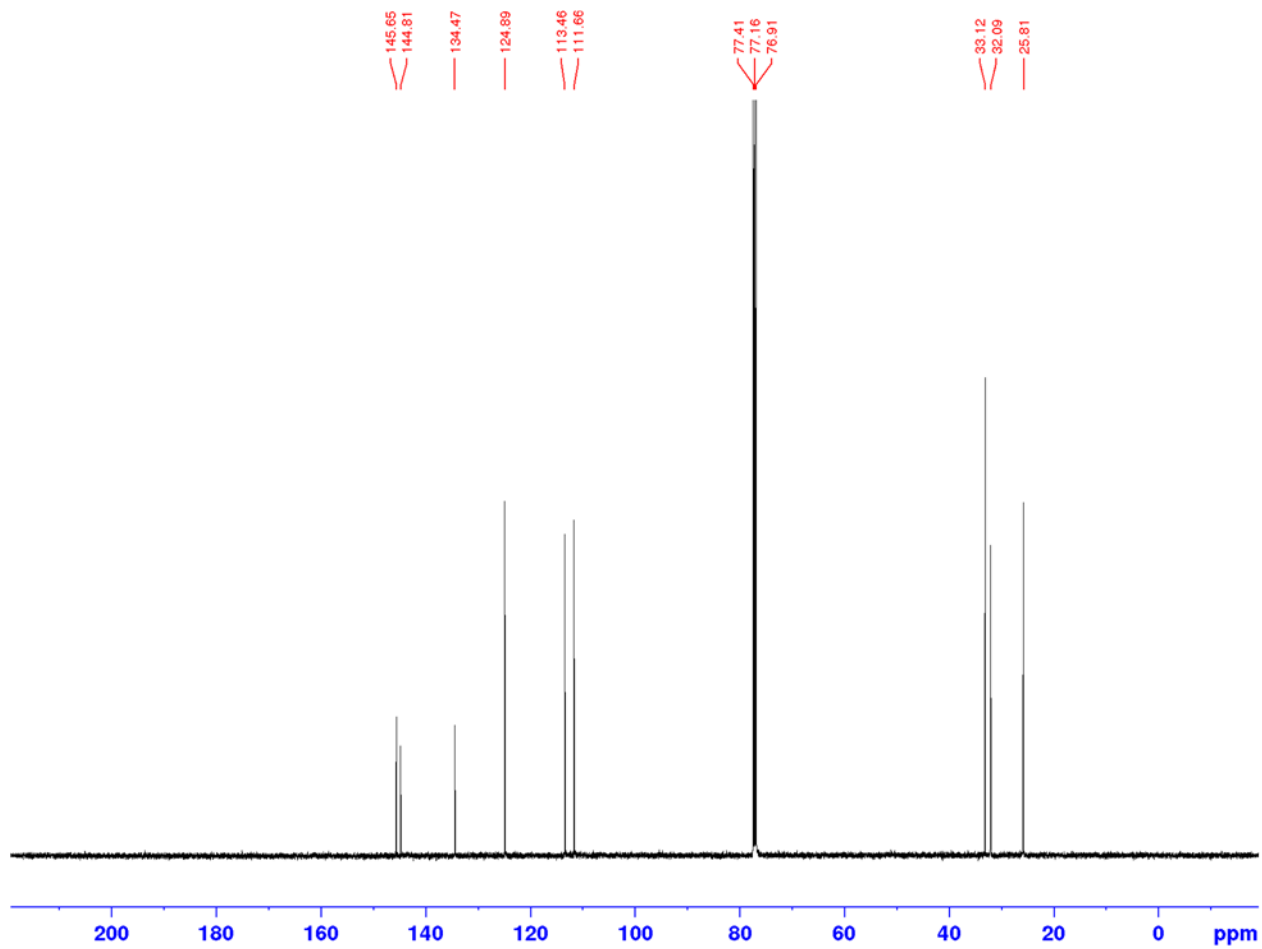

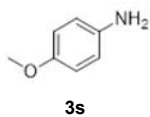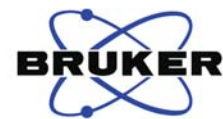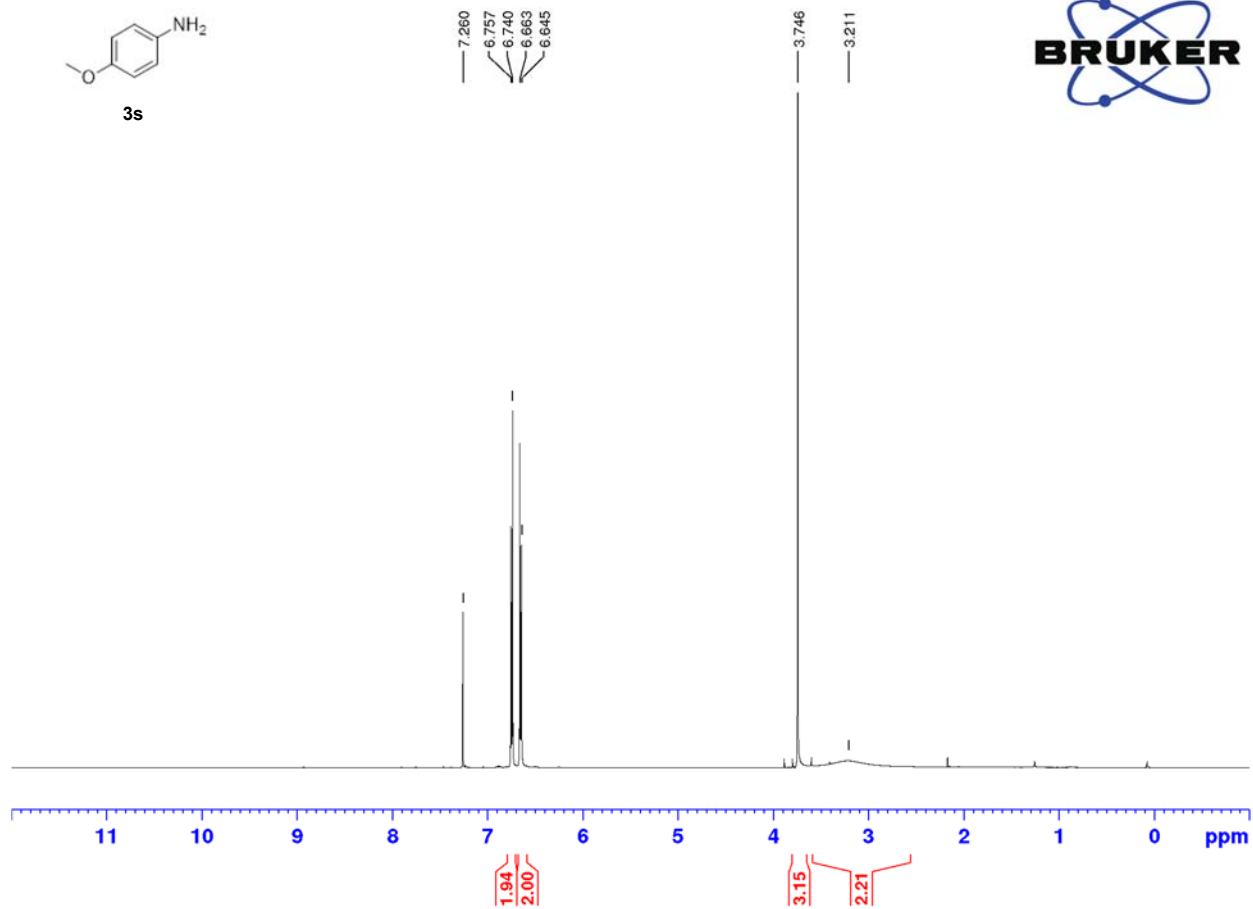

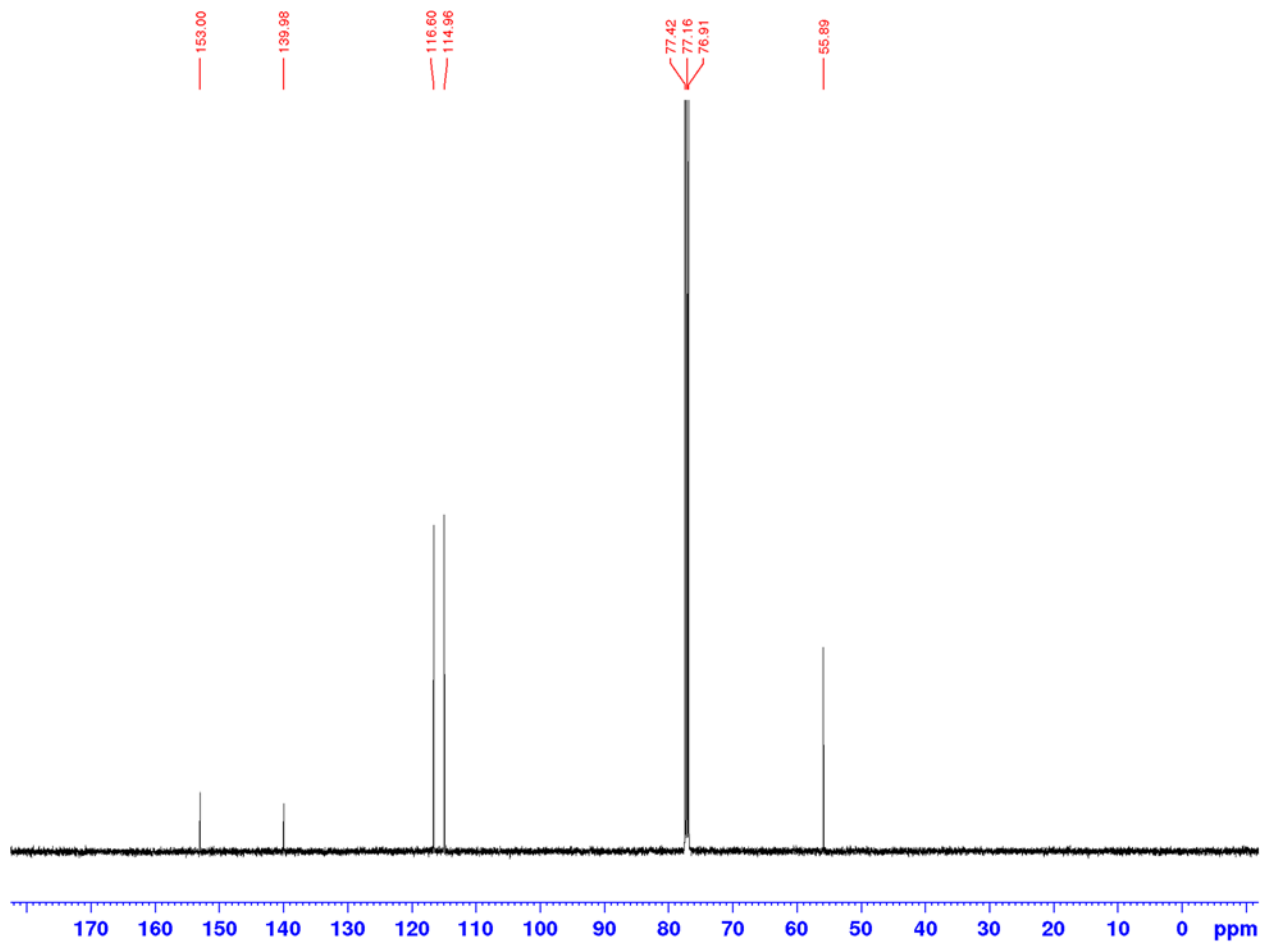

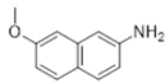

3t

7.601  
7.588  
7.582  
7.571  
7.260  
6.916  
6.901  
6.893  
6.888  
6.806  
6.801  
6.788  
6.784

3.894  
3.826

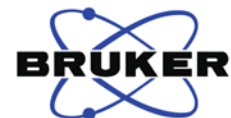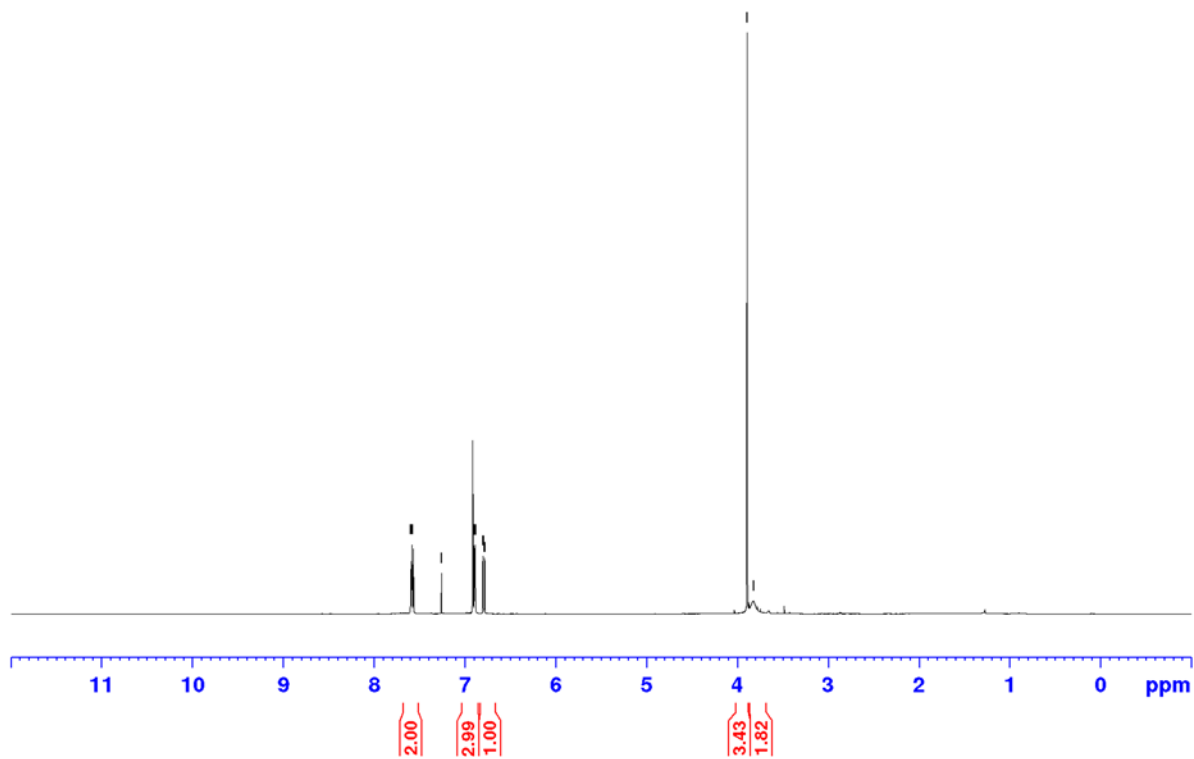

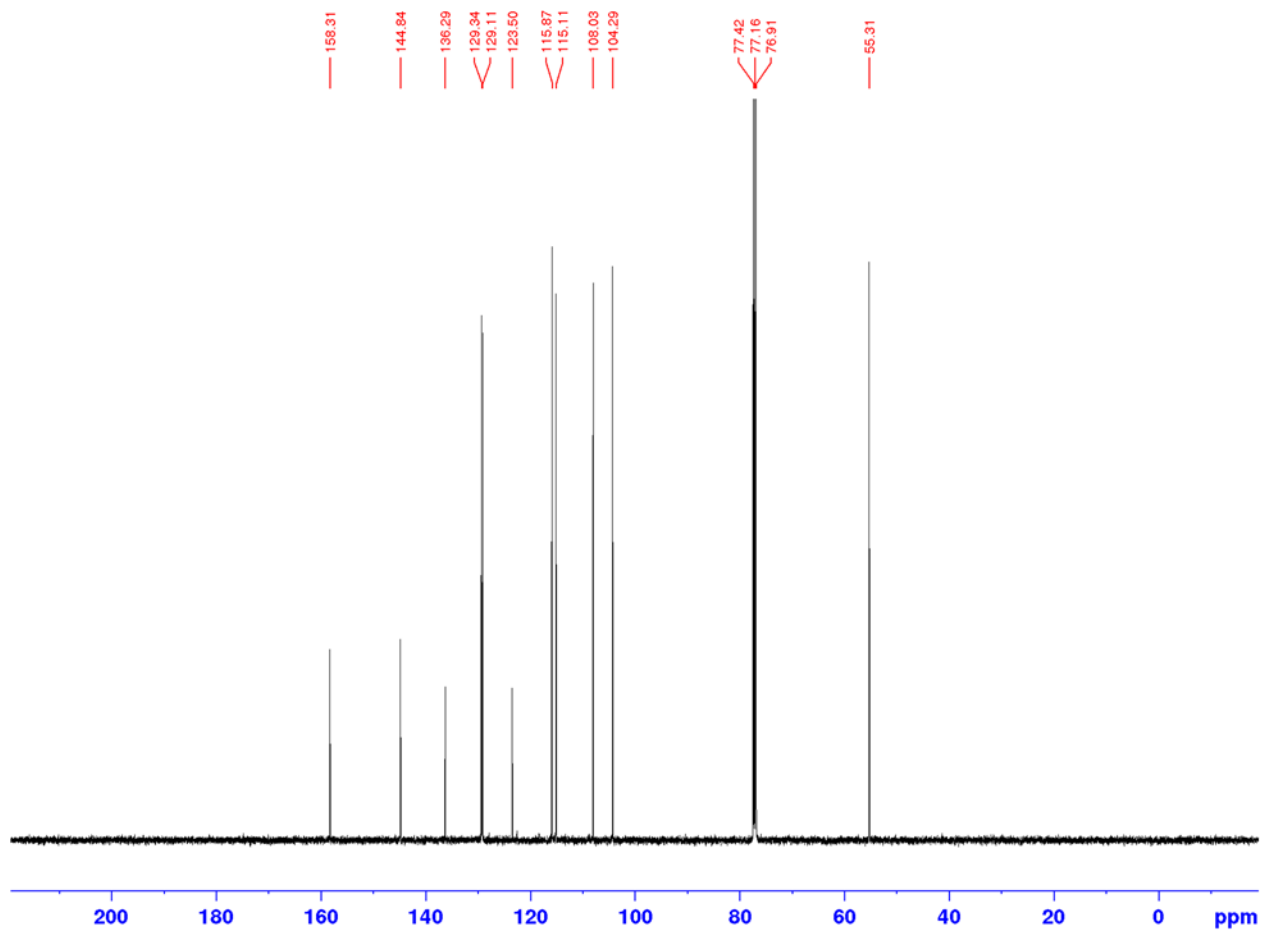

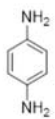

3u

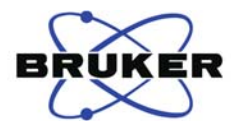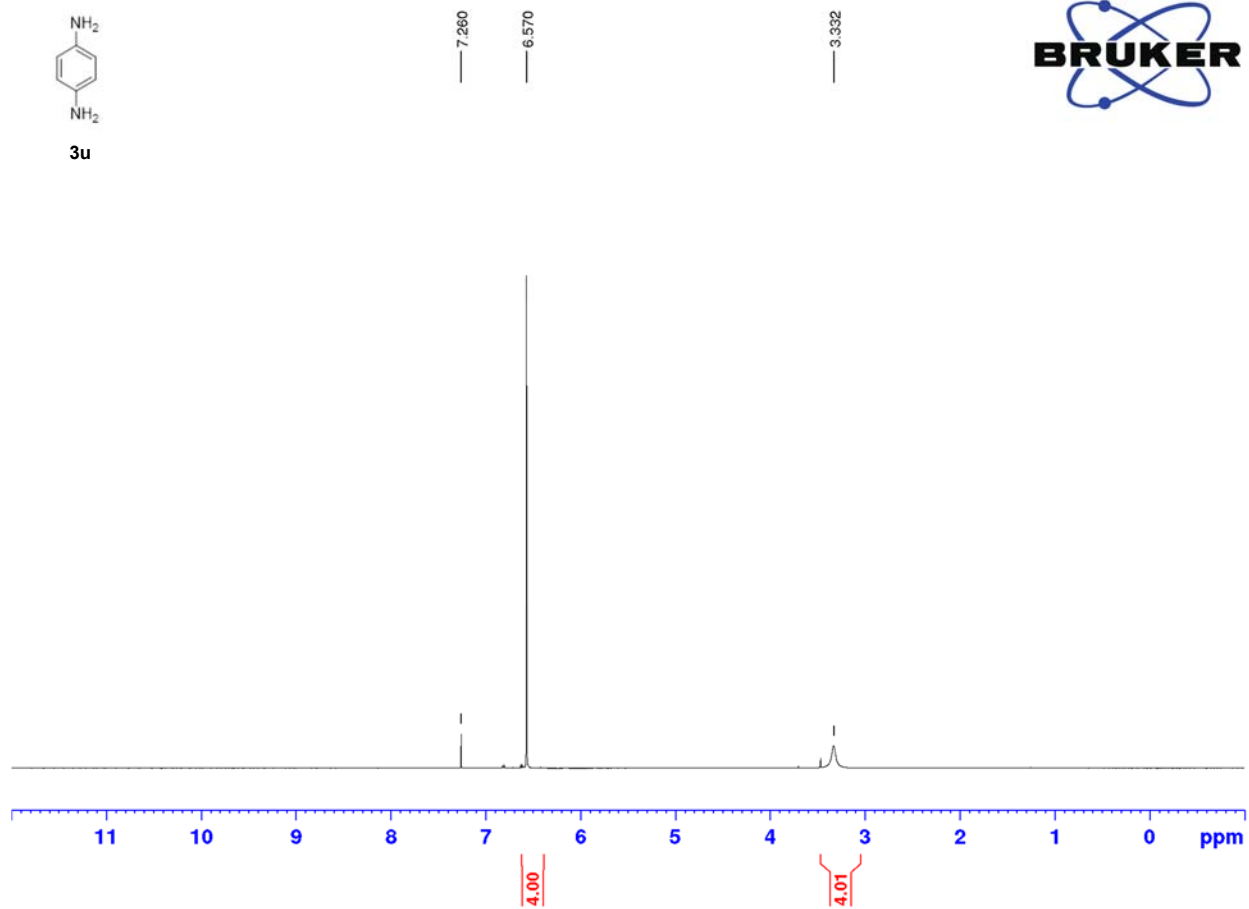

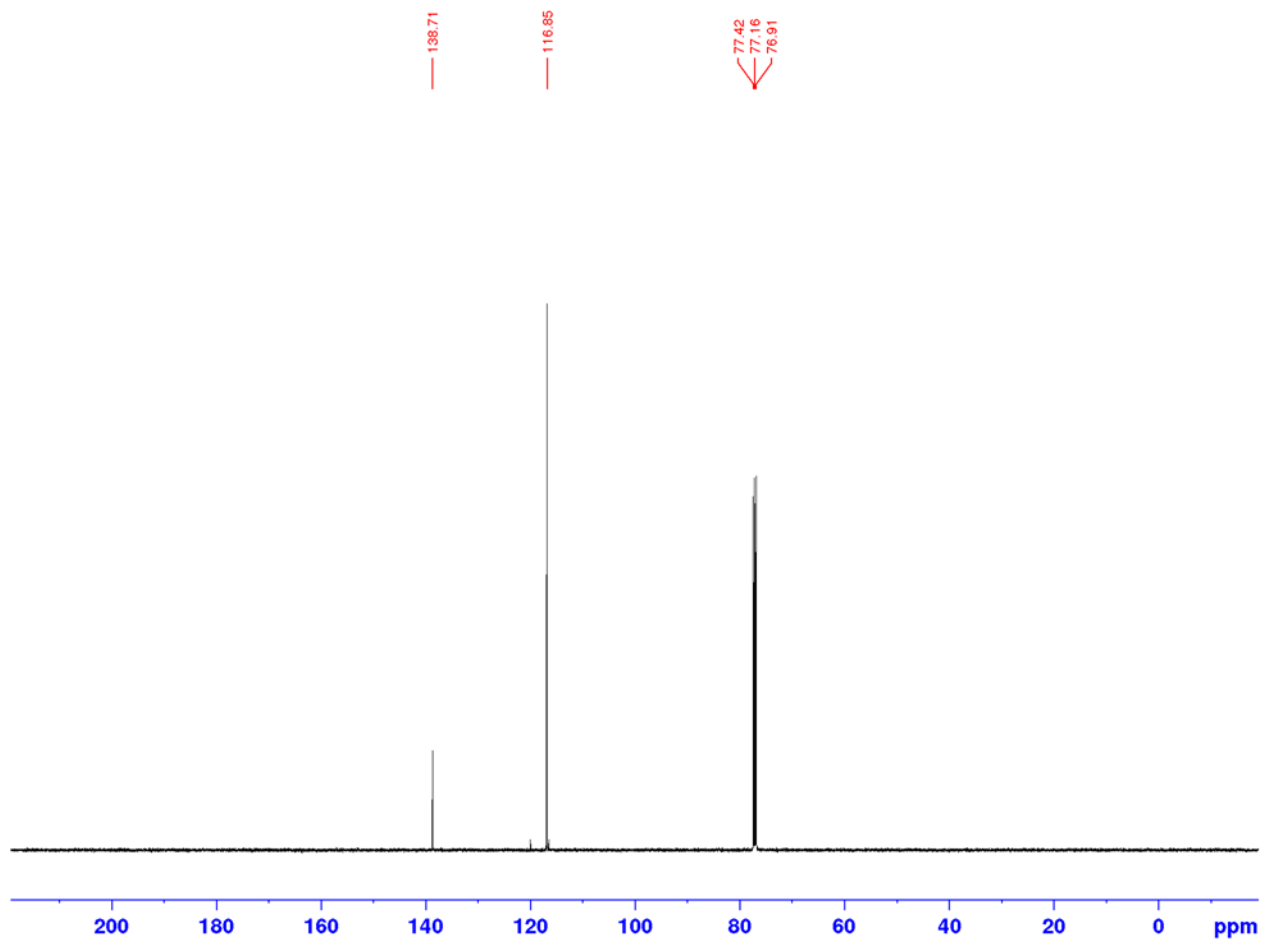

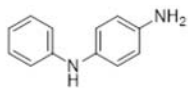

3v

7.260  
7.208  
7.194  
7.191  
7.176  
6.990  
6.973  
6.866  
6.864  
6.849  
6.847  
6.810  
6.797  
6.795  
6.793  
6.780  
6.682  
6.665  
5.406

— 3.550

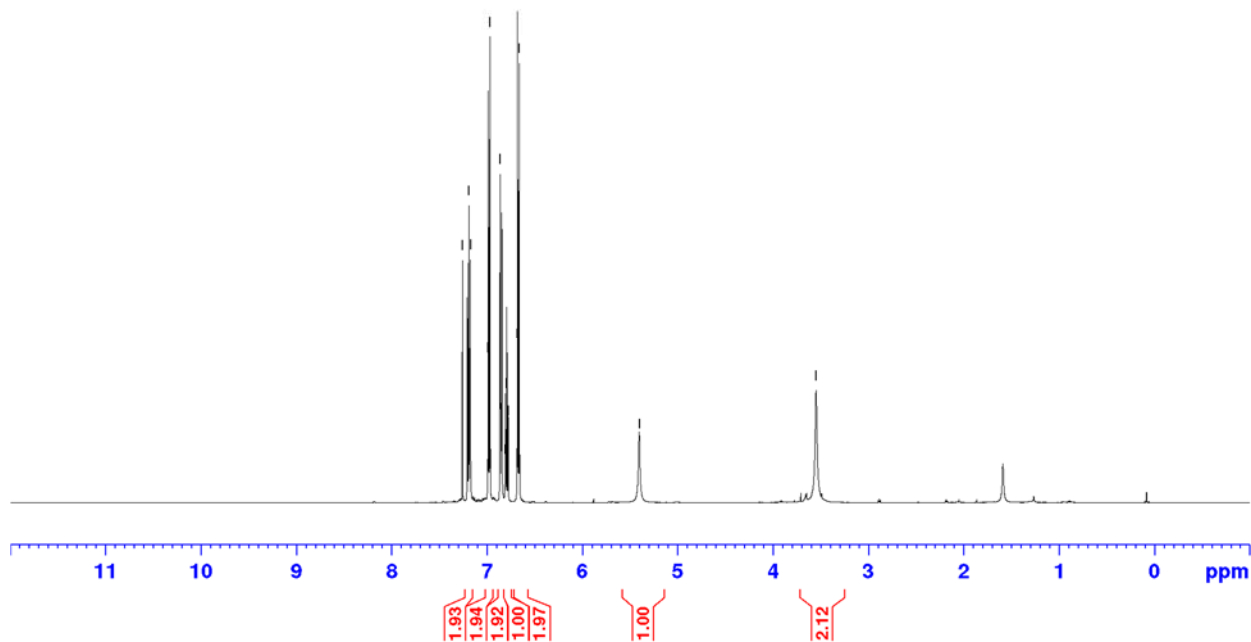



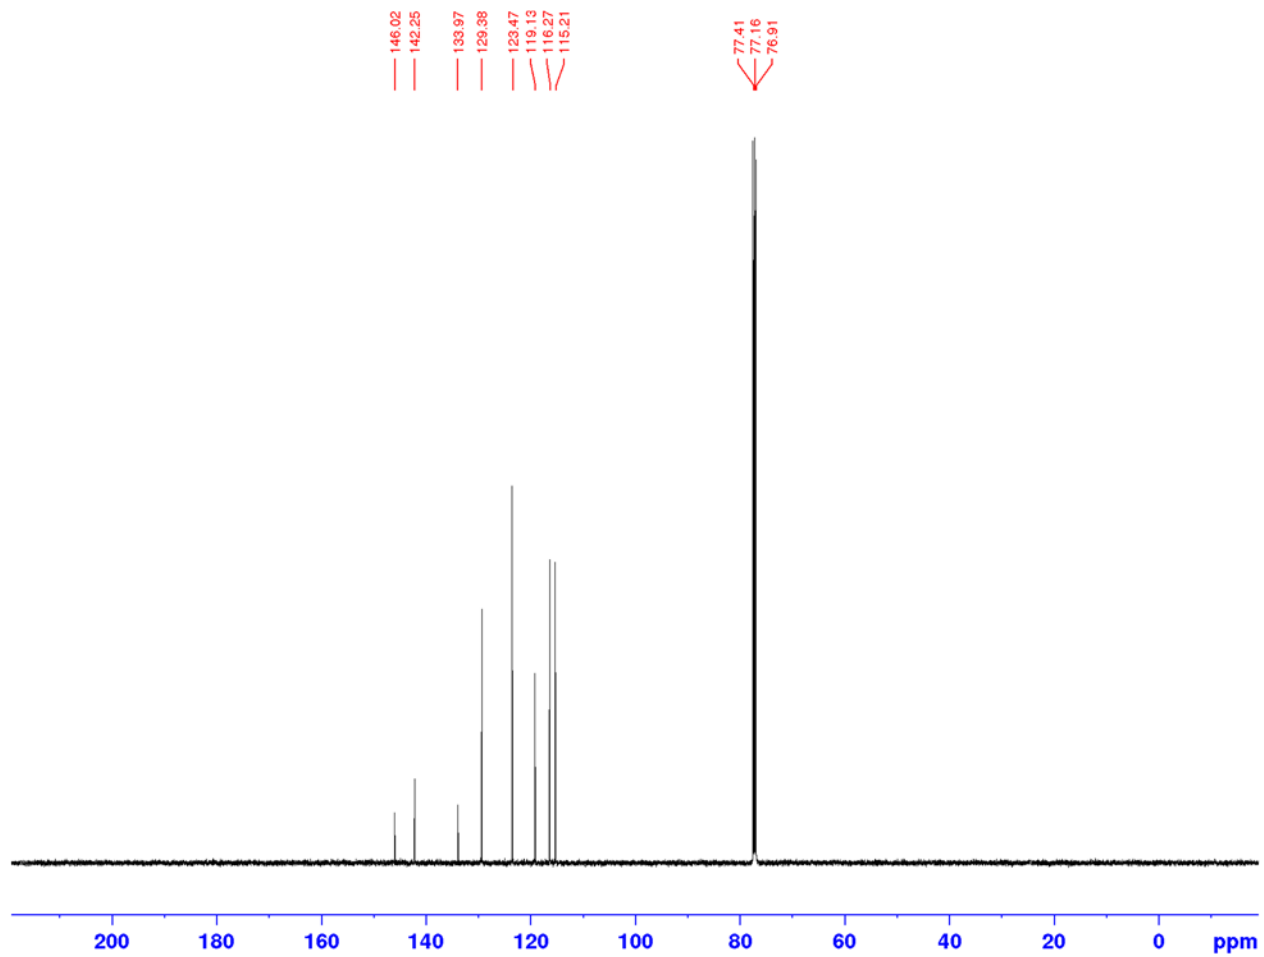

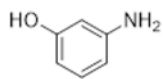

3w

8.838

6.782  
6.780  
6.766  
6.750  
6.003  
6.000  
5.988  
5.987  
5.986  
5.933  
5.930  
5.920  
5.918  
5.916  
5.914  
4.869

2.515  
2.511  
2.508  
2.504  
2.501

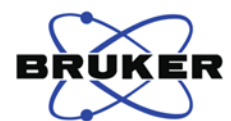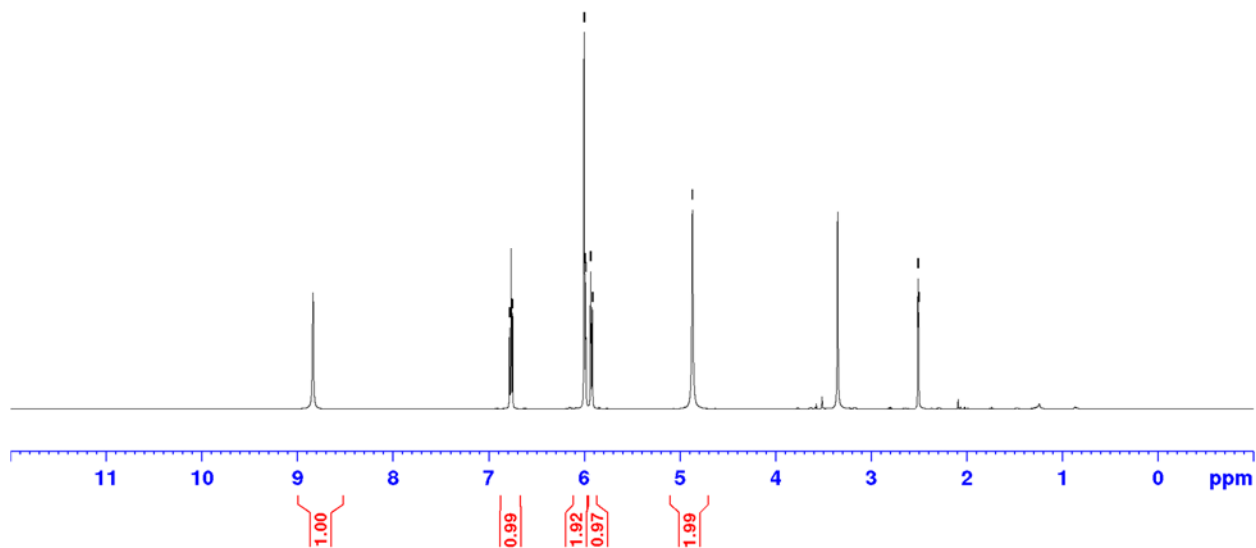

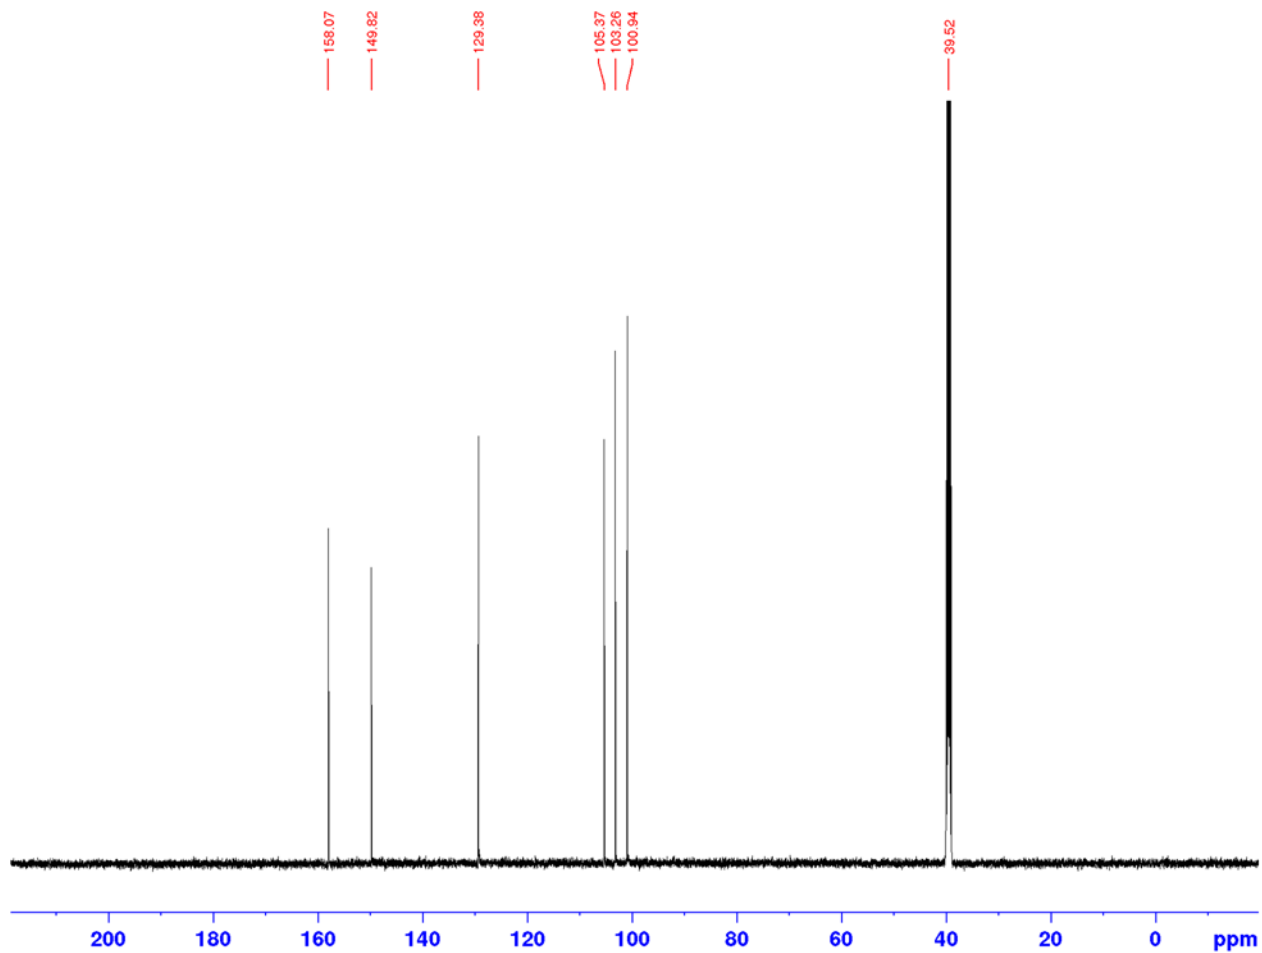

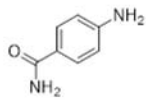

3x

7.597  
7.580  
7.521

6.836  
6.535  
6.517

5.600

2.515  
2.512  
2.508  
2.504  
2.501

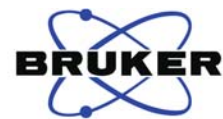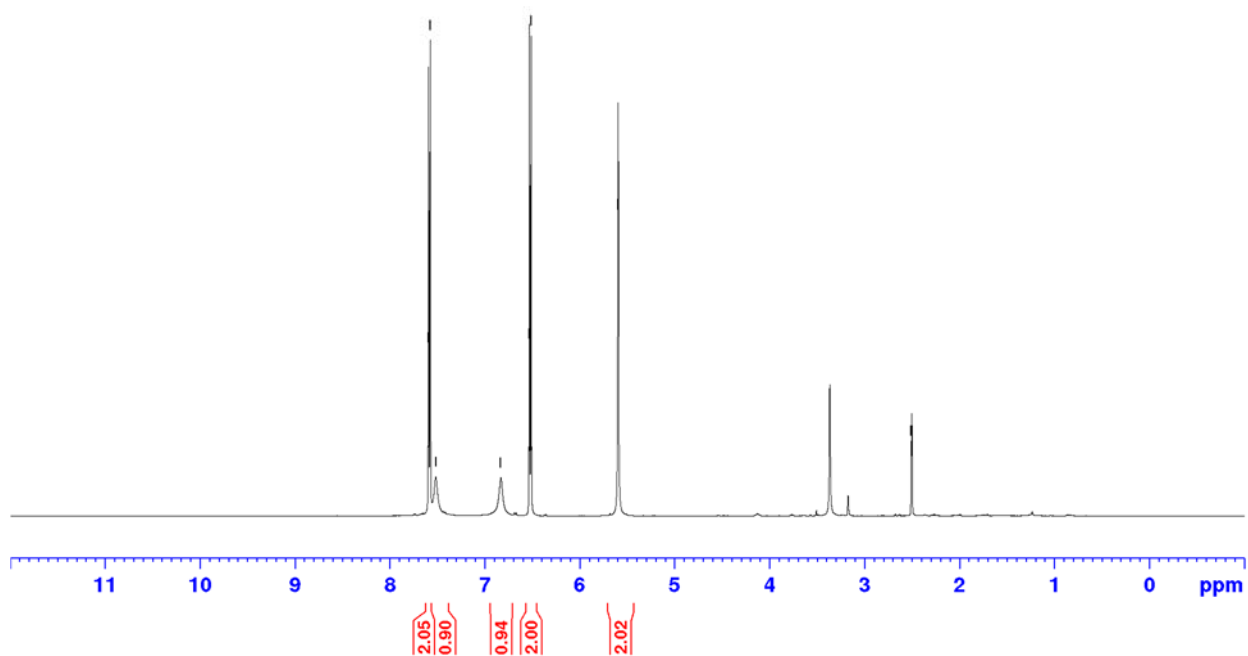

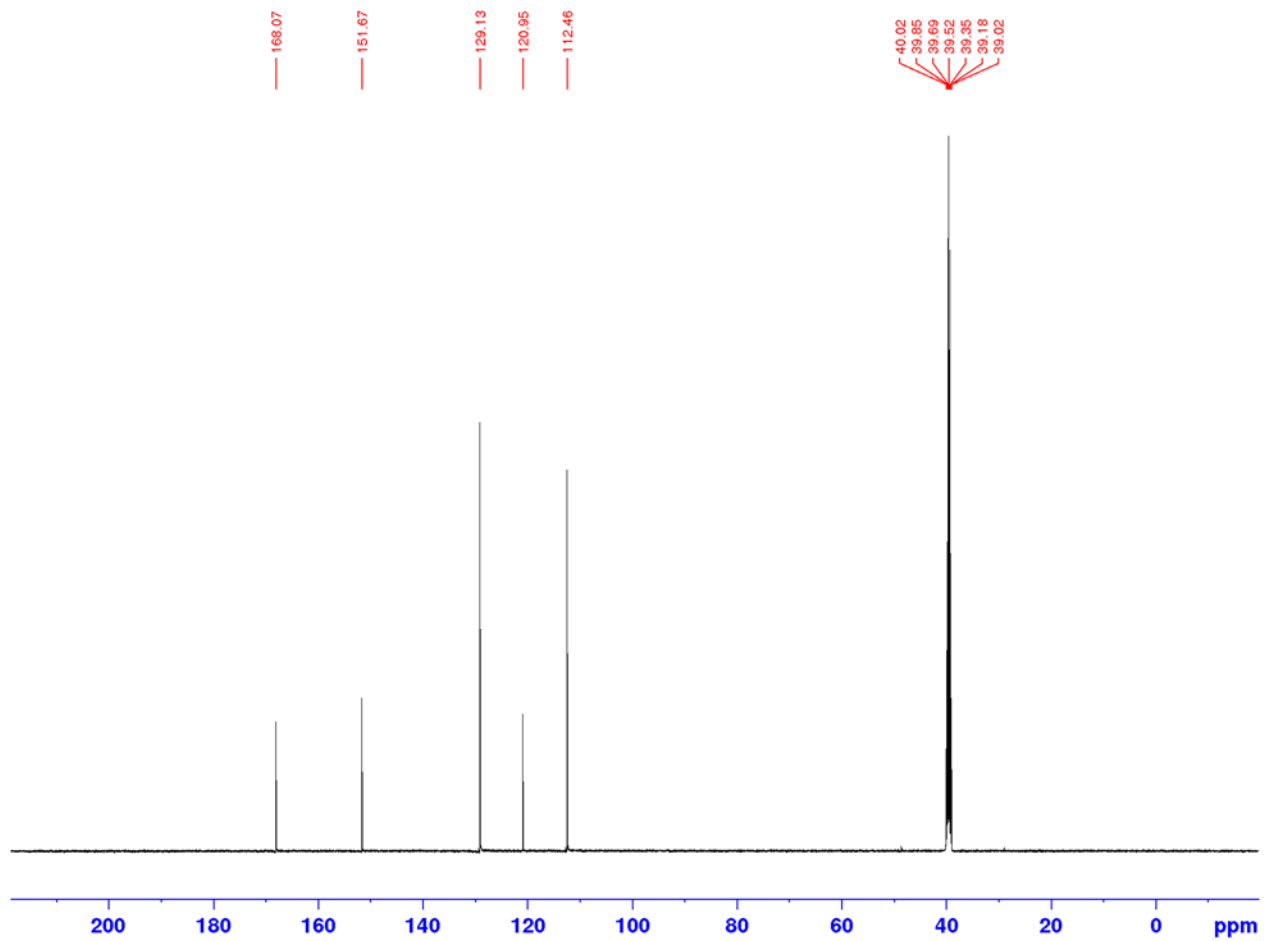

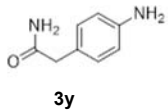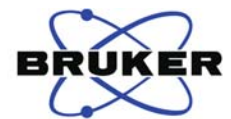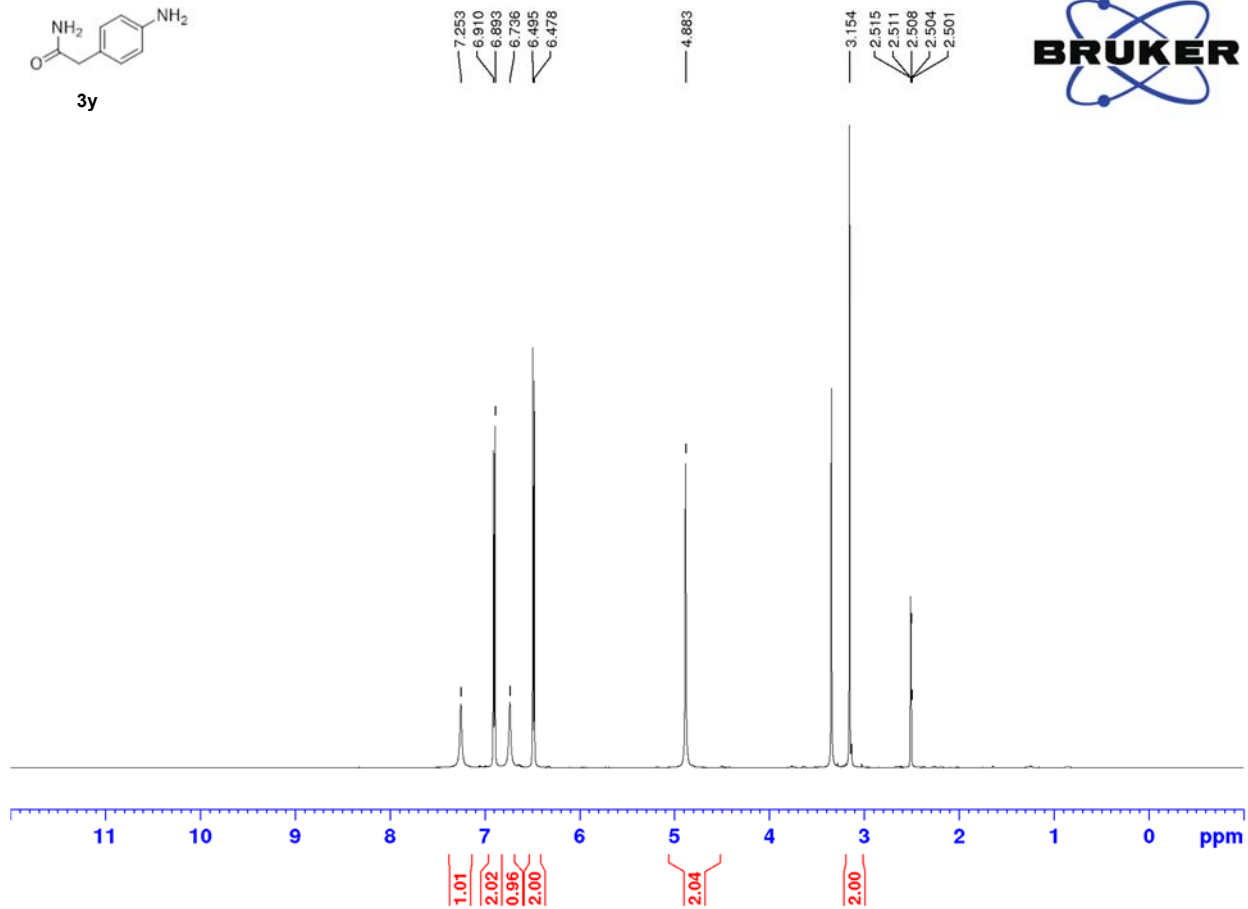

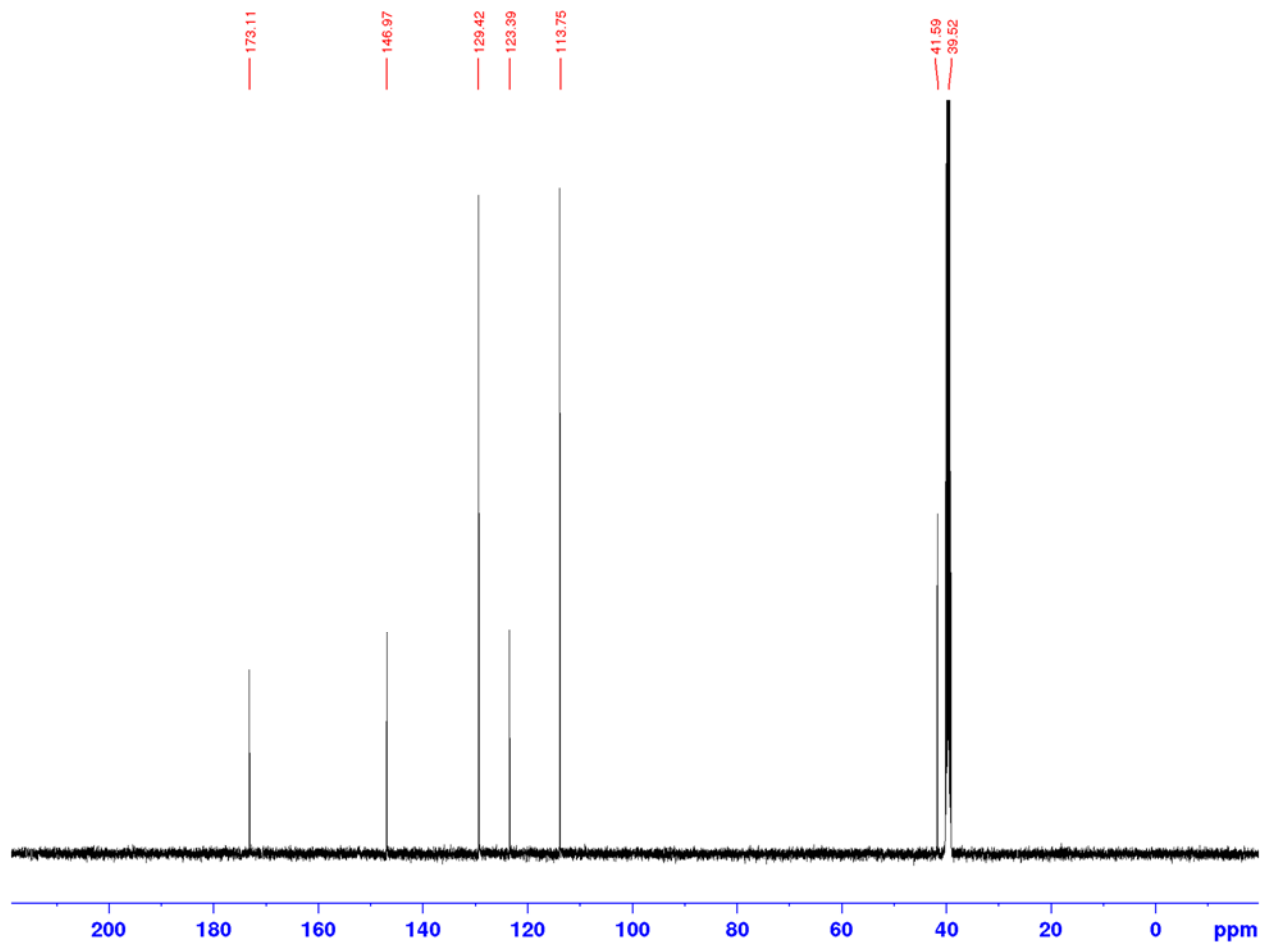

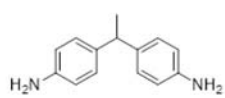

3z

7.260  
7.003  
6.986  
6.621  
6.604

3.975  
3.860  
3.946  
3.931  
3.540

1.550  
1.535

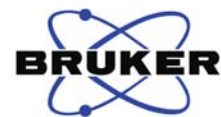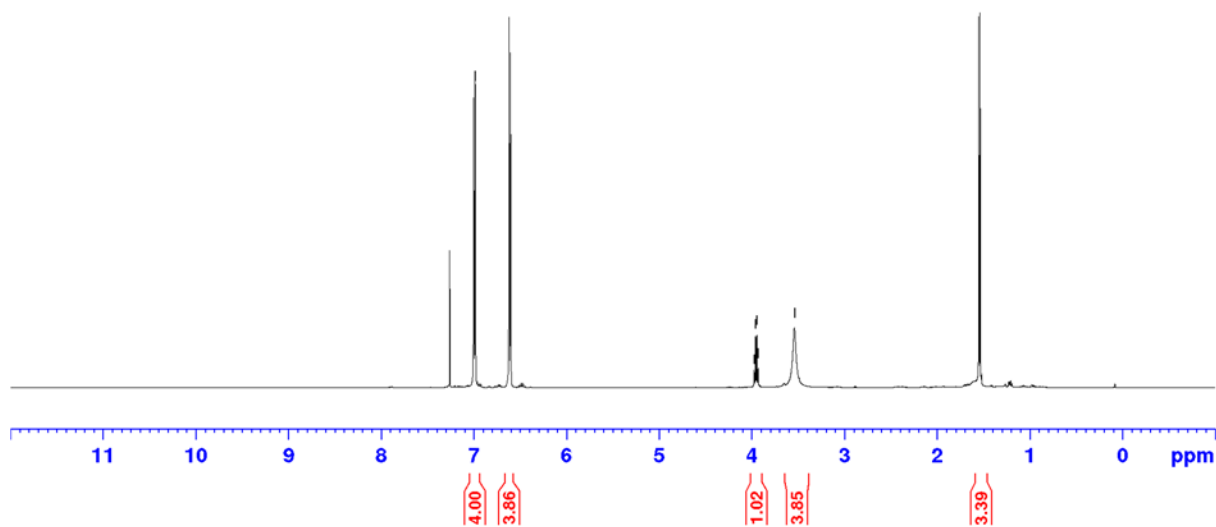



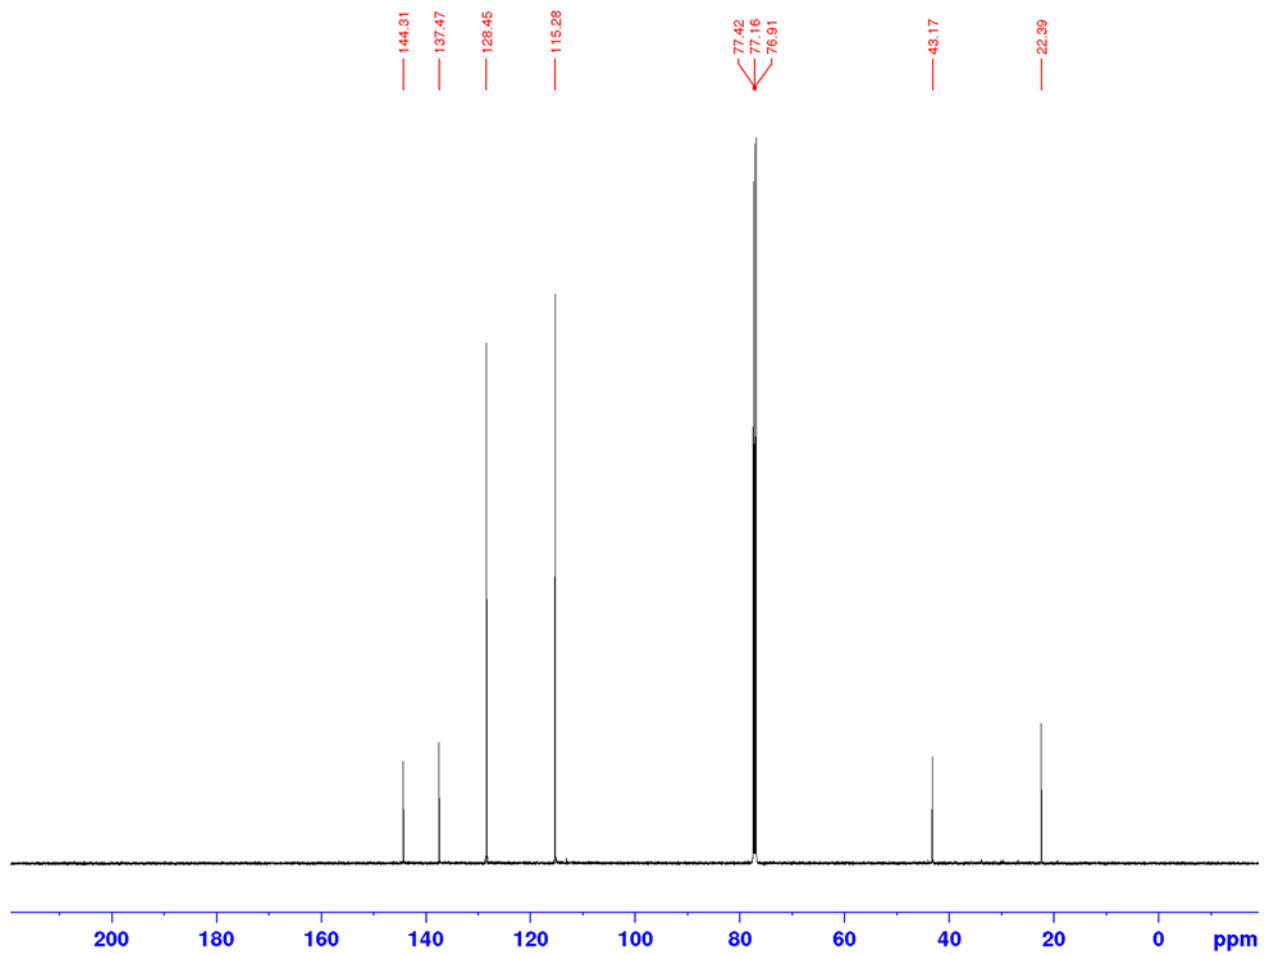

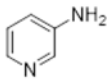

3aa

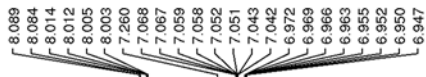

3.708

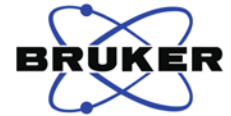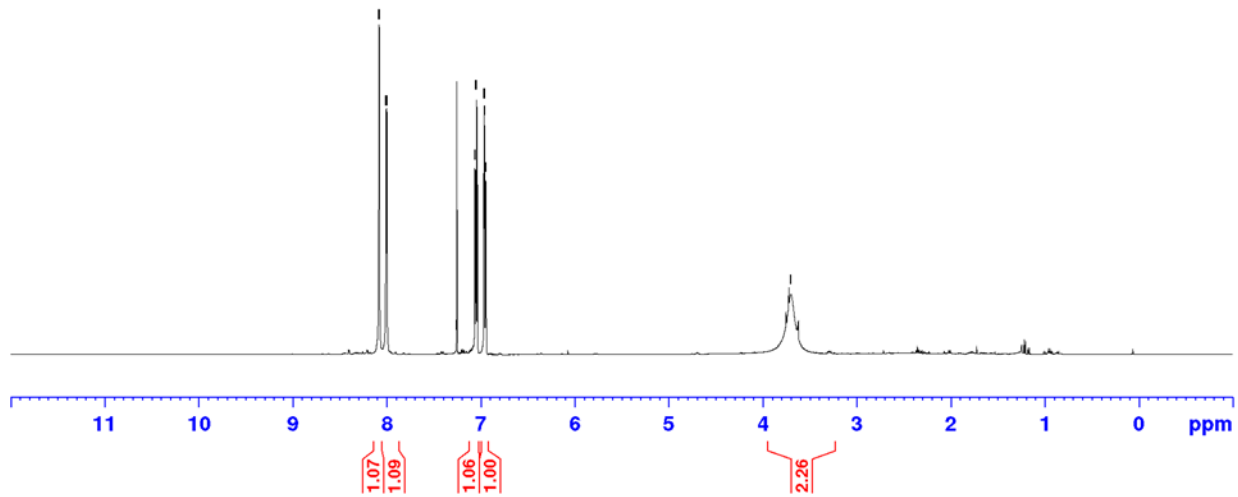

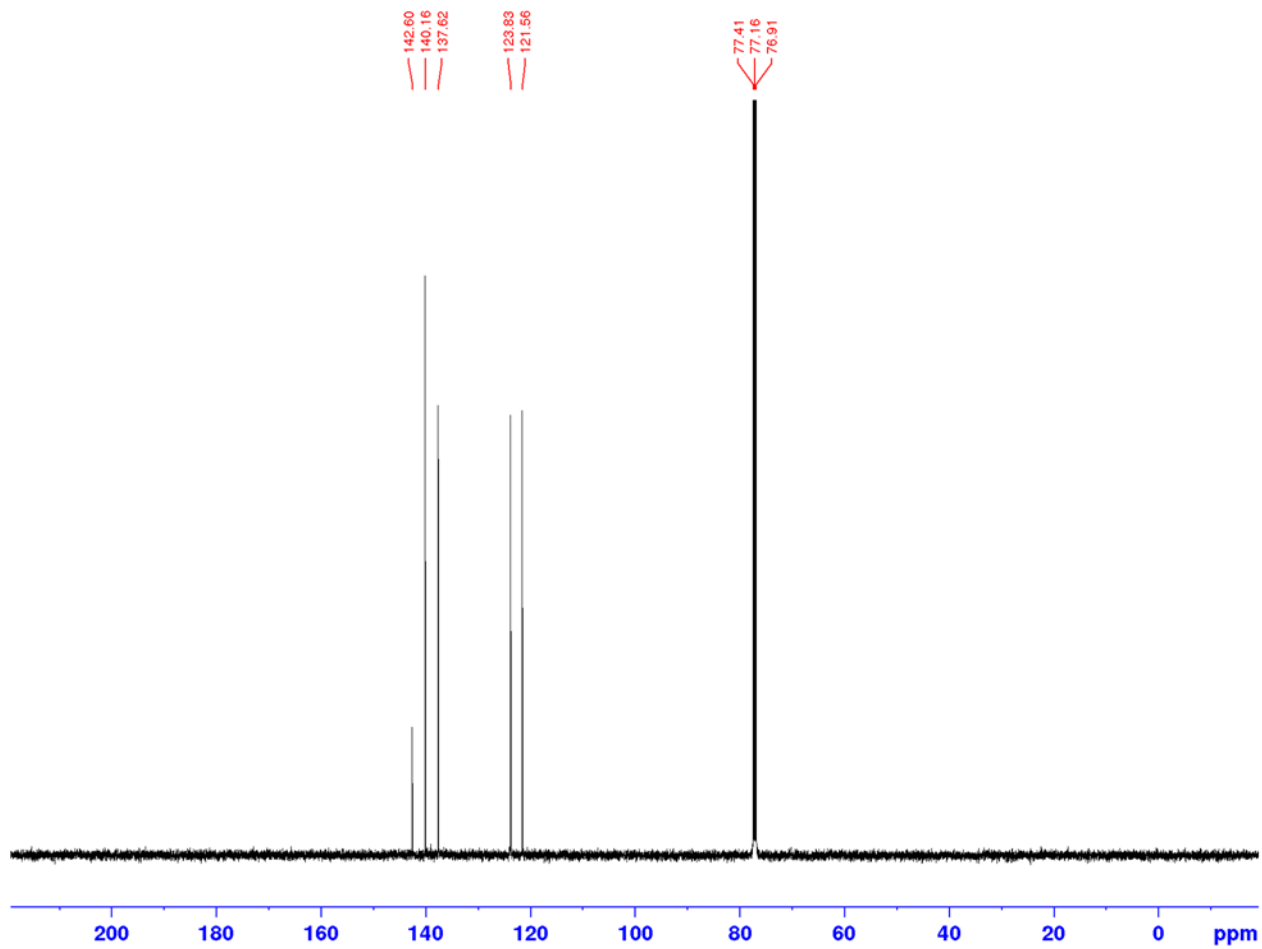

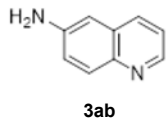

8.655  
8.652  
8.647  
8.643  
7.915  
7.897  
7.881  
7.274  
7.266  
7.260  
7.258  
7.249  
7.161  
7.156  
7.144  
7.138  
6.894  
6.889

3.941

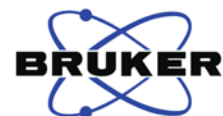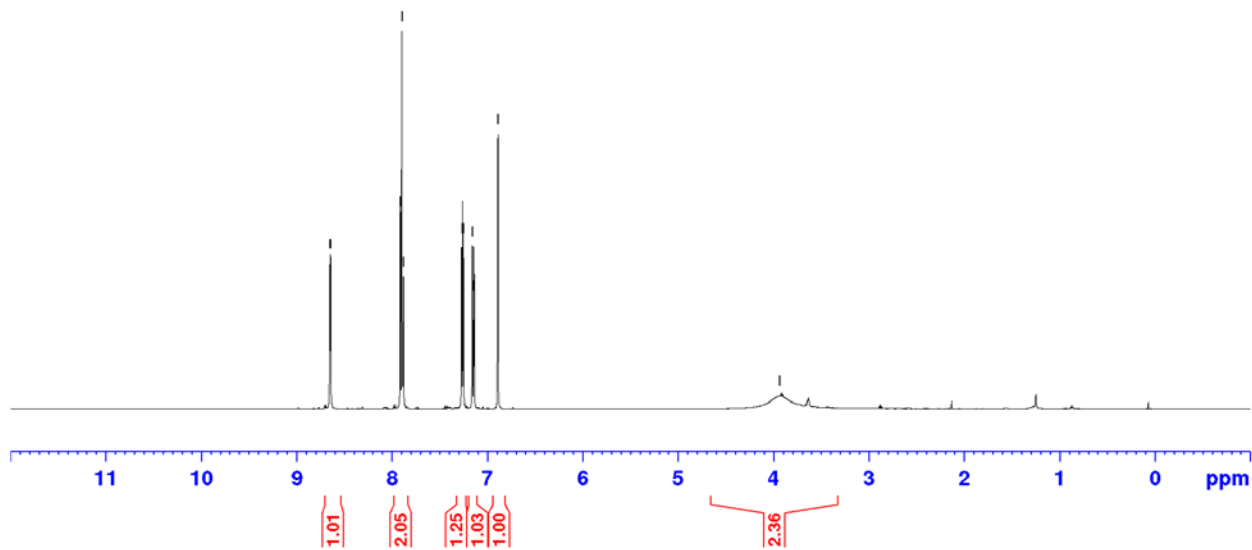

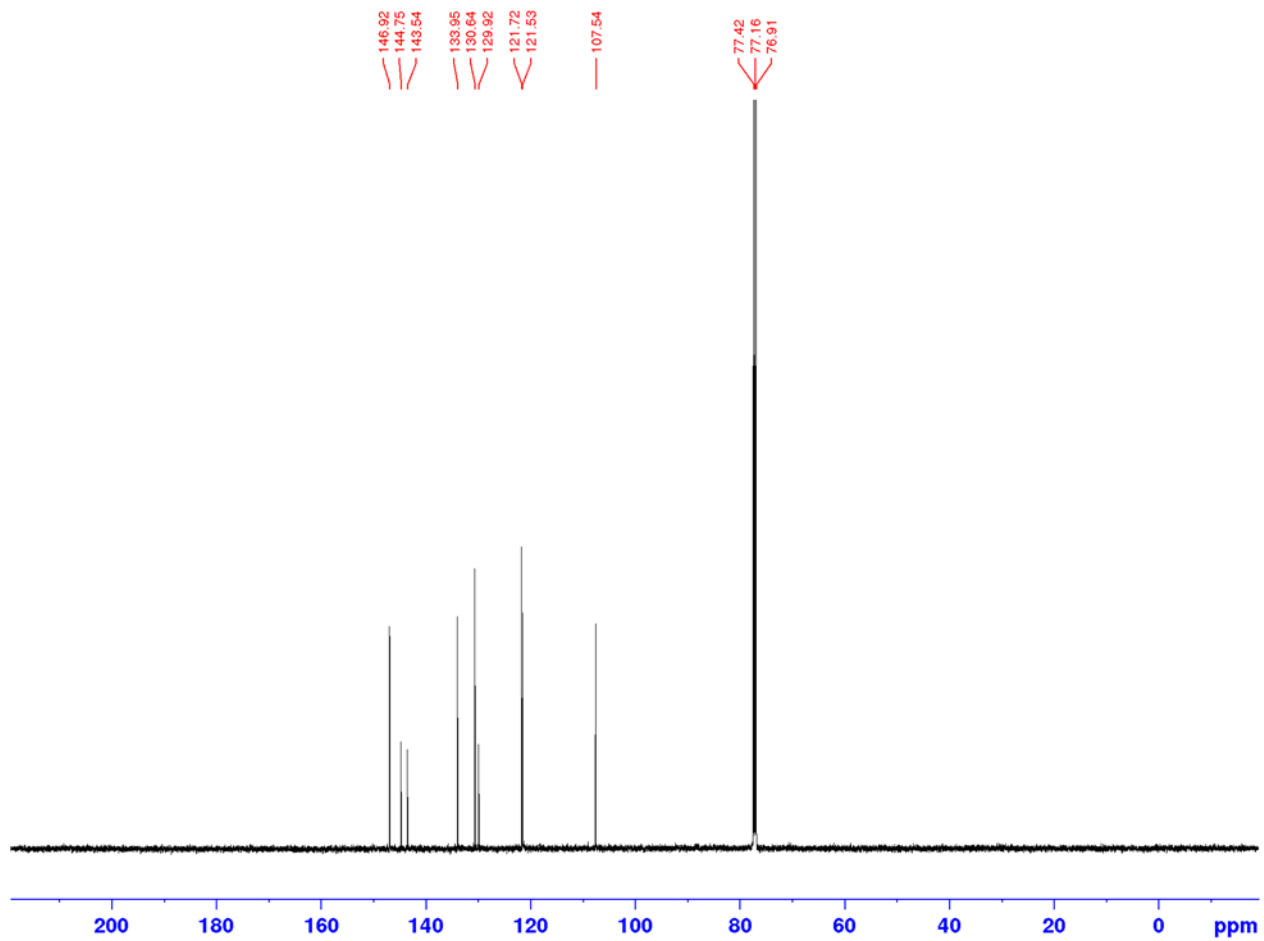

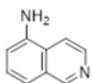

3ac

9.184  
9.183  
8.499  
8.487  
7.583  
7.571  
7.419  
7.411  
7.408  
7.260  
6.968  
6.959  
6.951

4.213

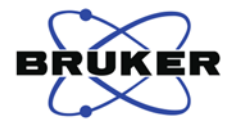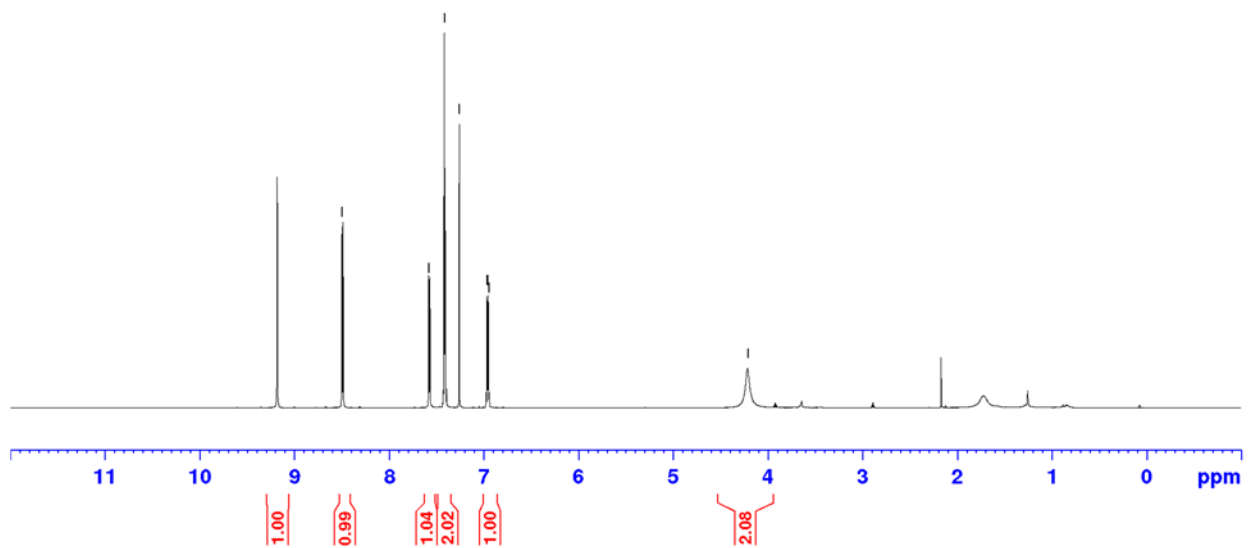

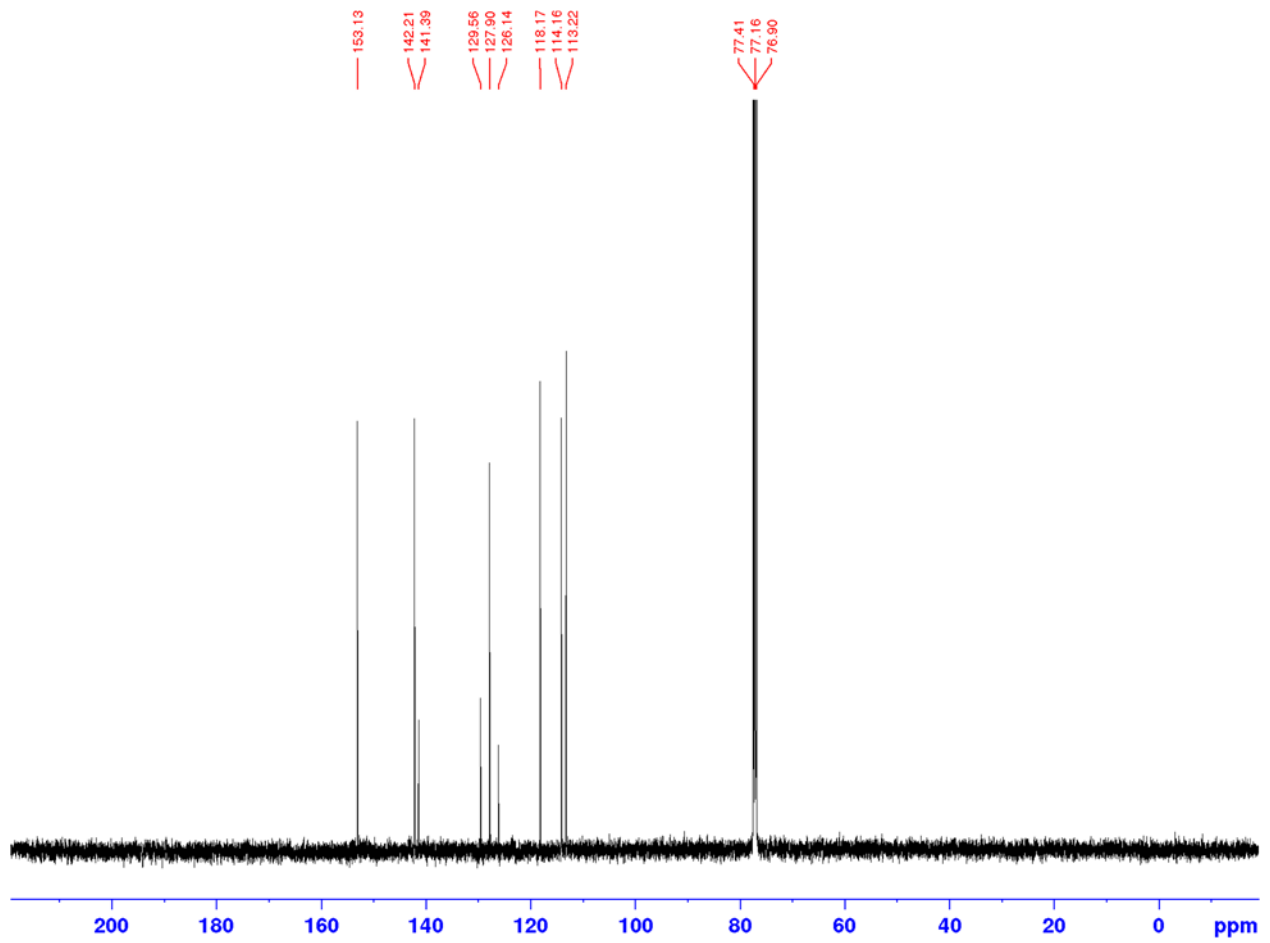

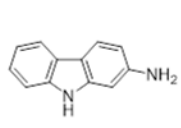

3ad

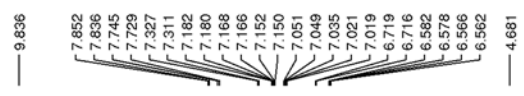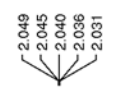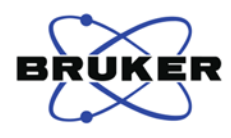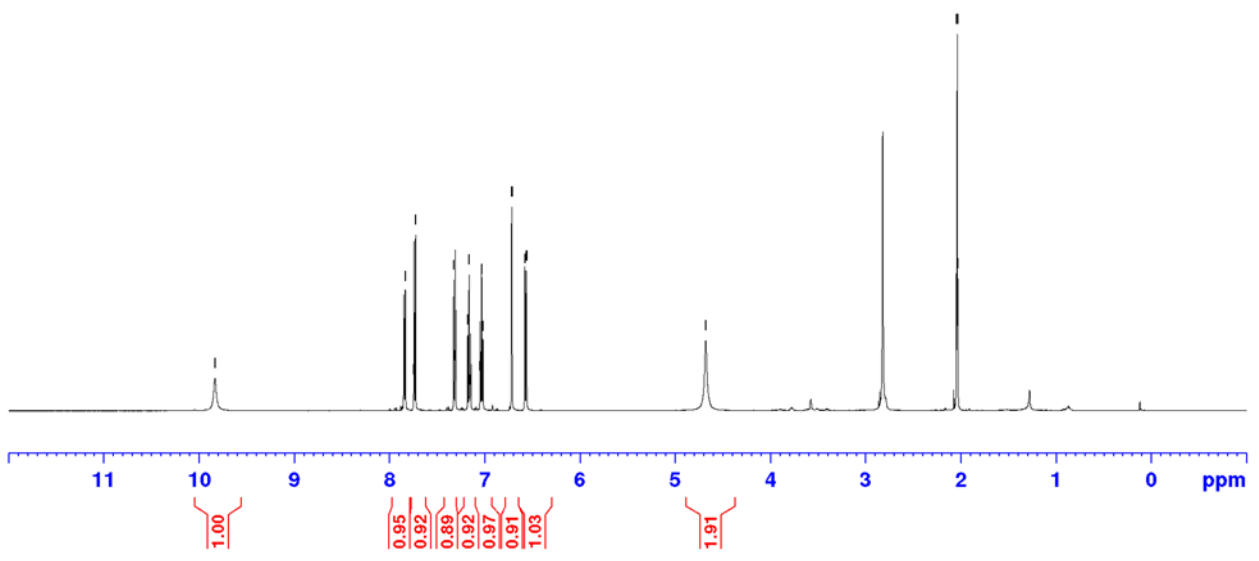



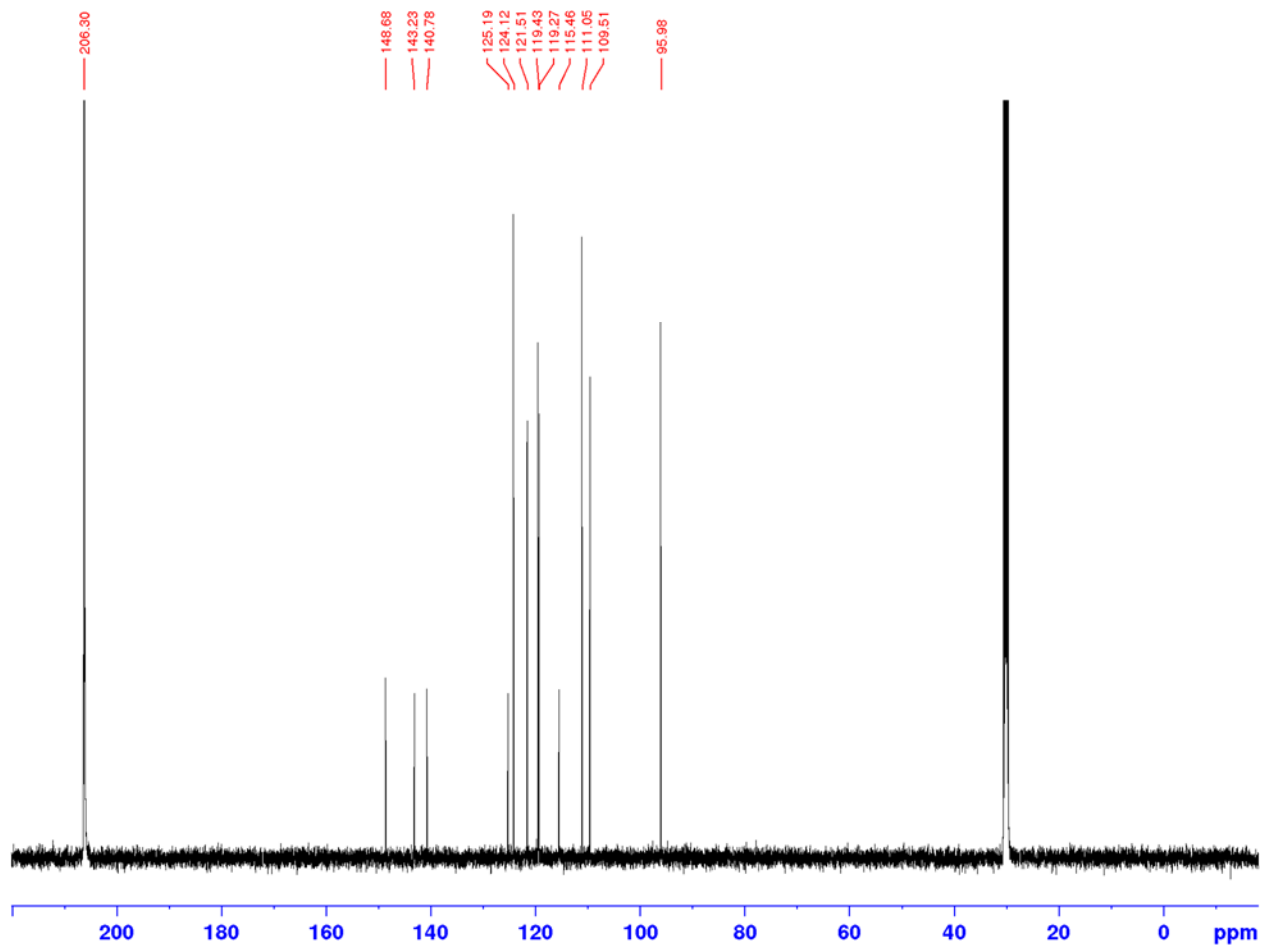

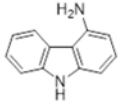

3ae

8.041  
7.984  
7.968  
7.435  
7.419  
7.401  
7.399  
7.387  
7.385  
7.371  
7.369  
7.264  
7.252  
7.248  
7.237  
7.232  
7.221  
6.905  
6.904  
6.889  
6.888  
6.553  
6.552  
6.538  
6.537  
— 4.344

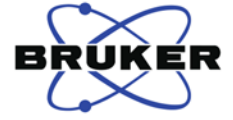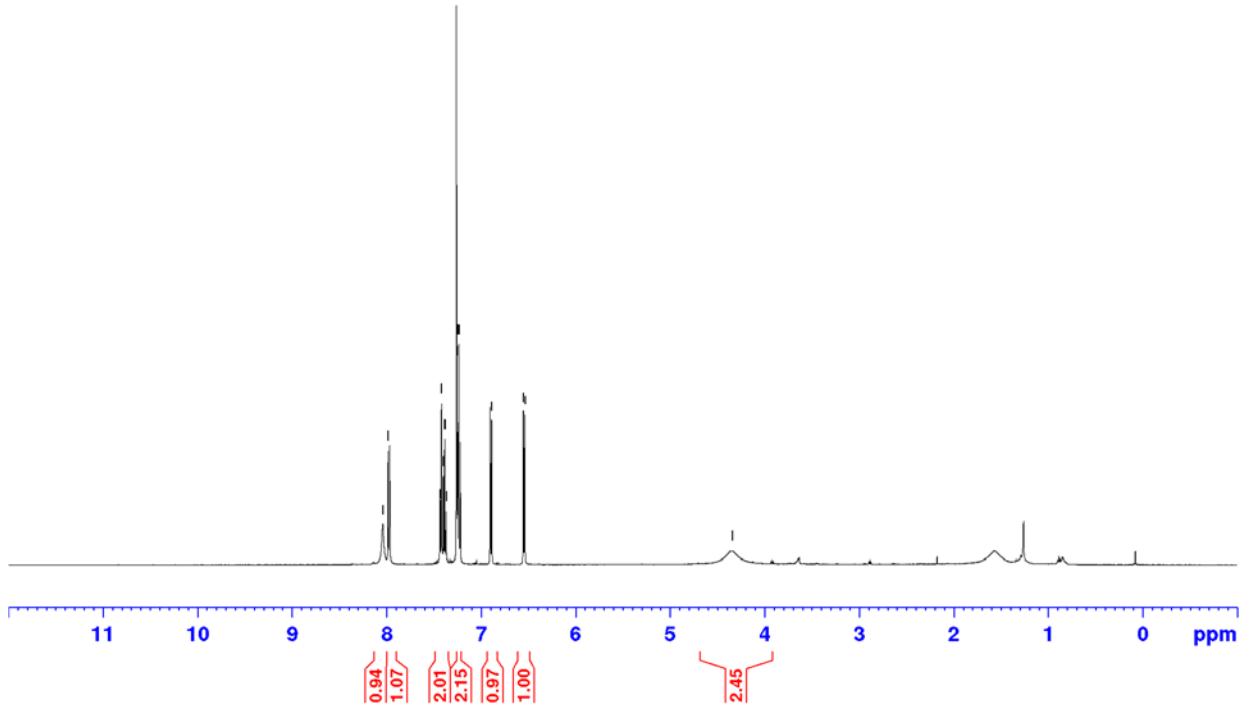

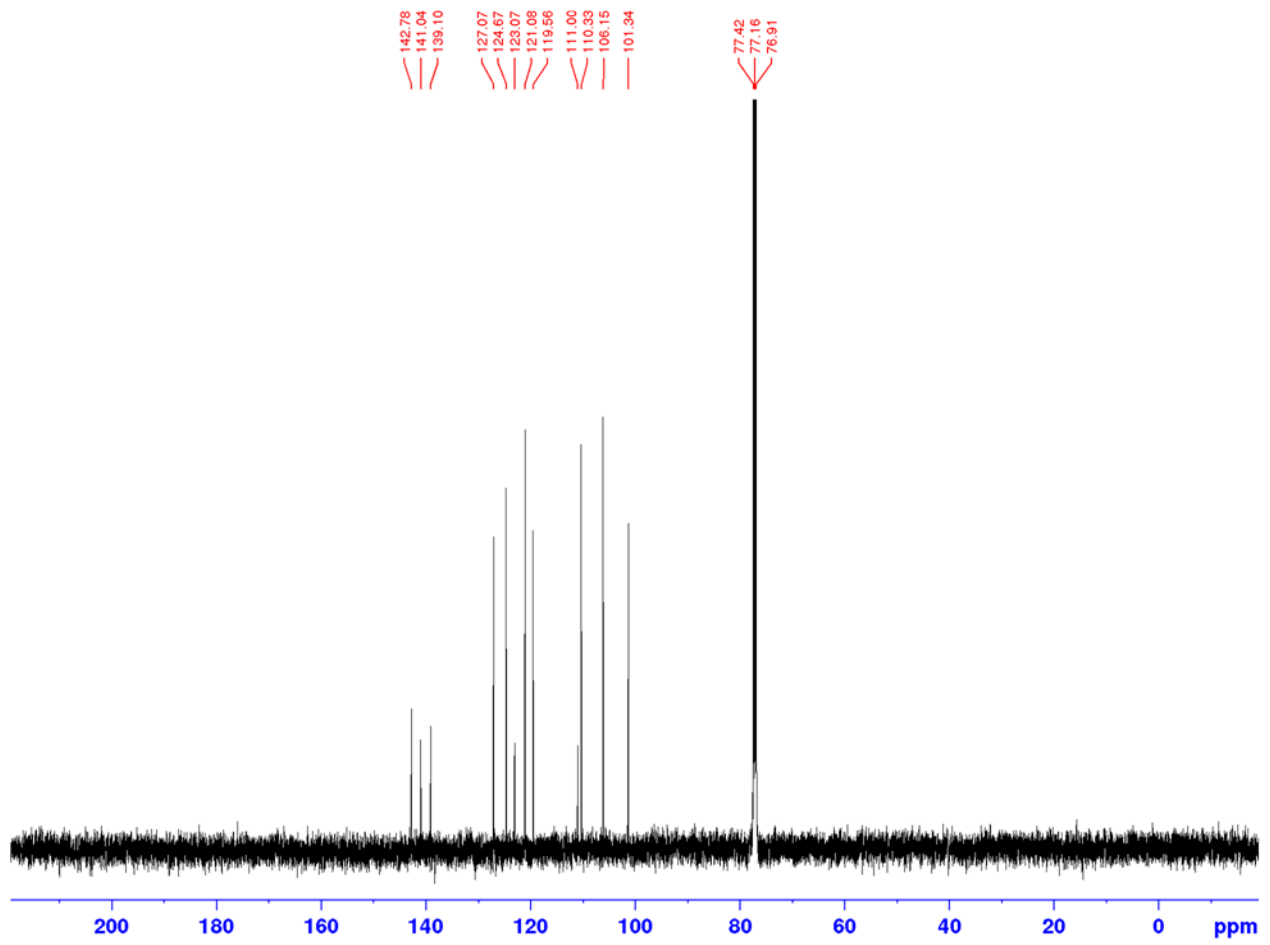

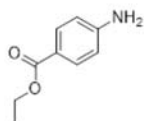

3af

7.863  
7.846  
7.260  
6.642  
6.625

4.335  
4.321  
4.307  
4.292  
4.049

1.372  
1.358  
1.343

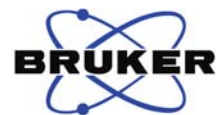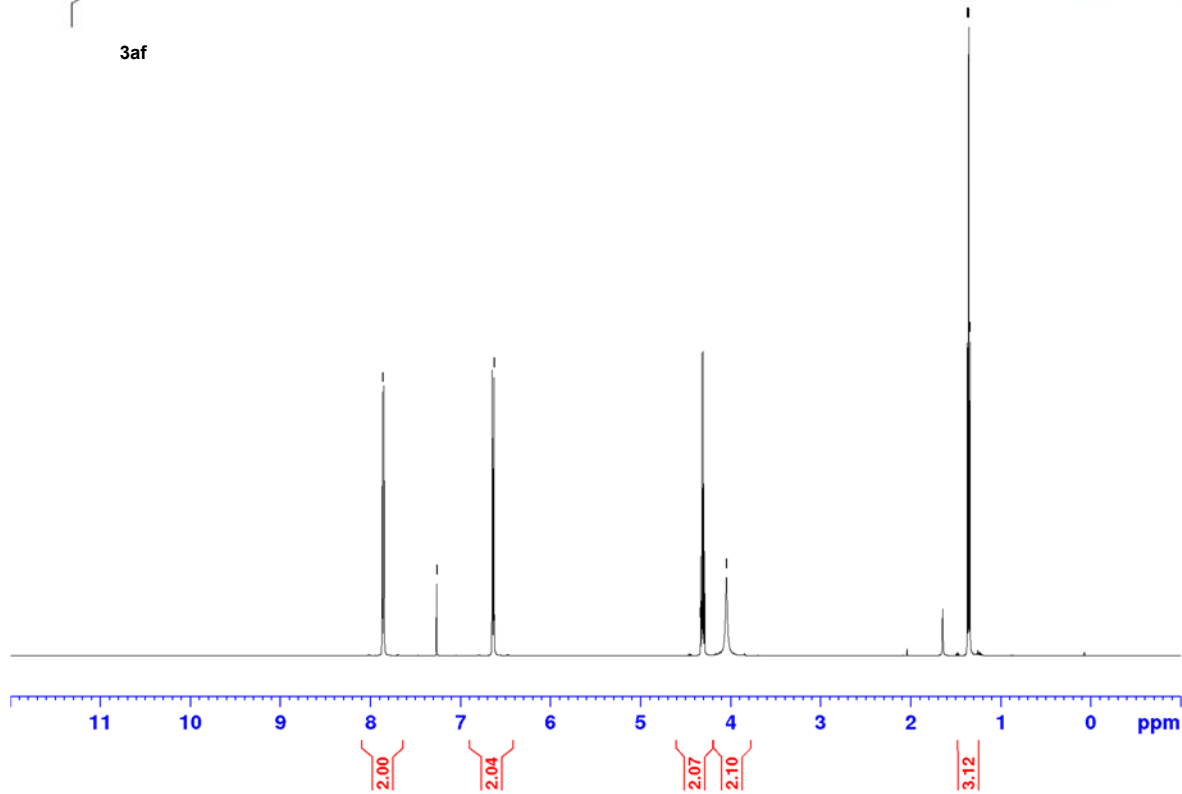

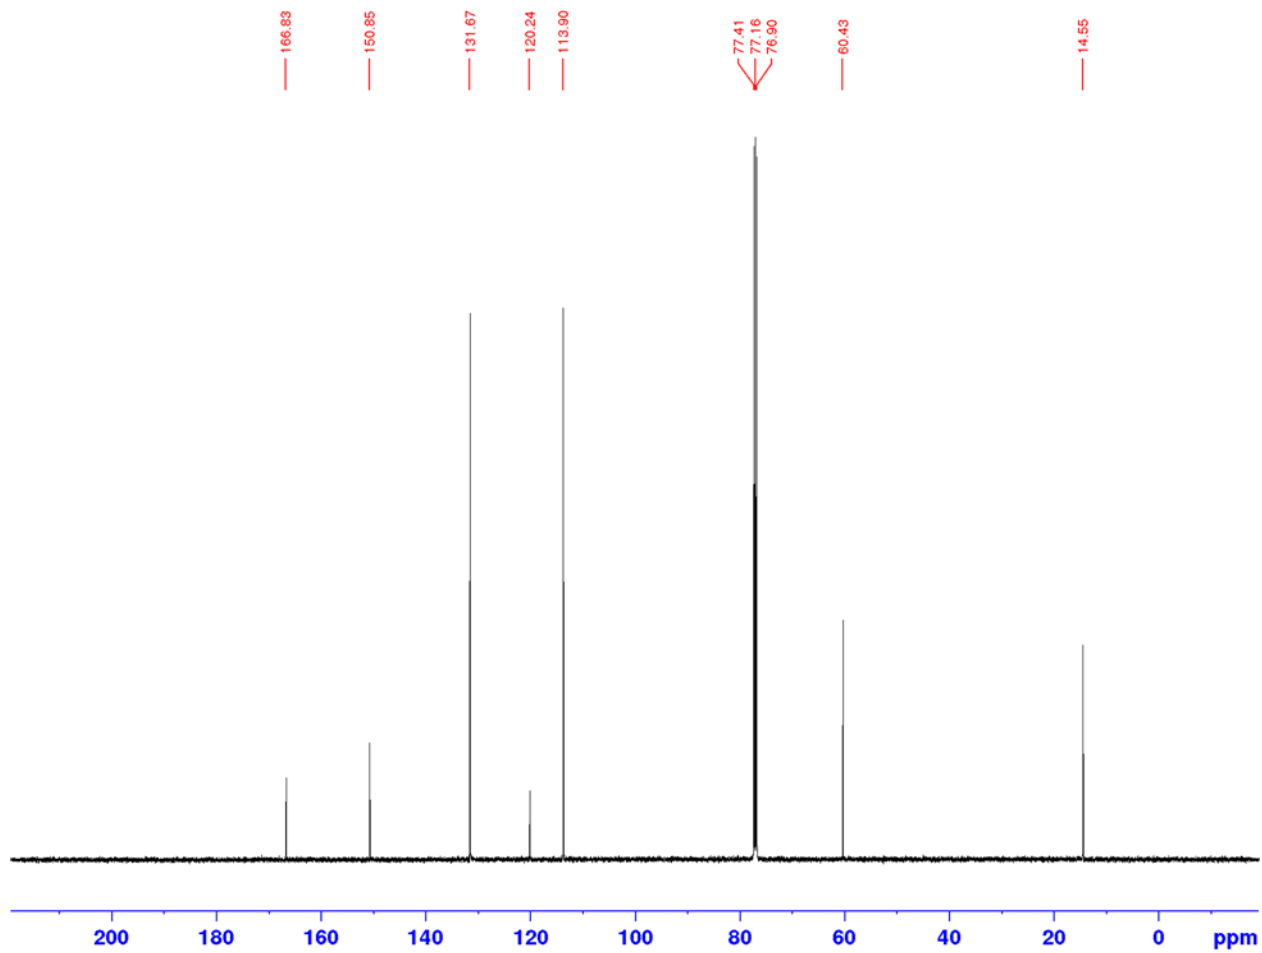

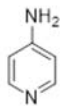

3ag

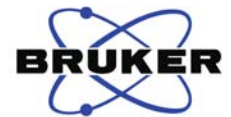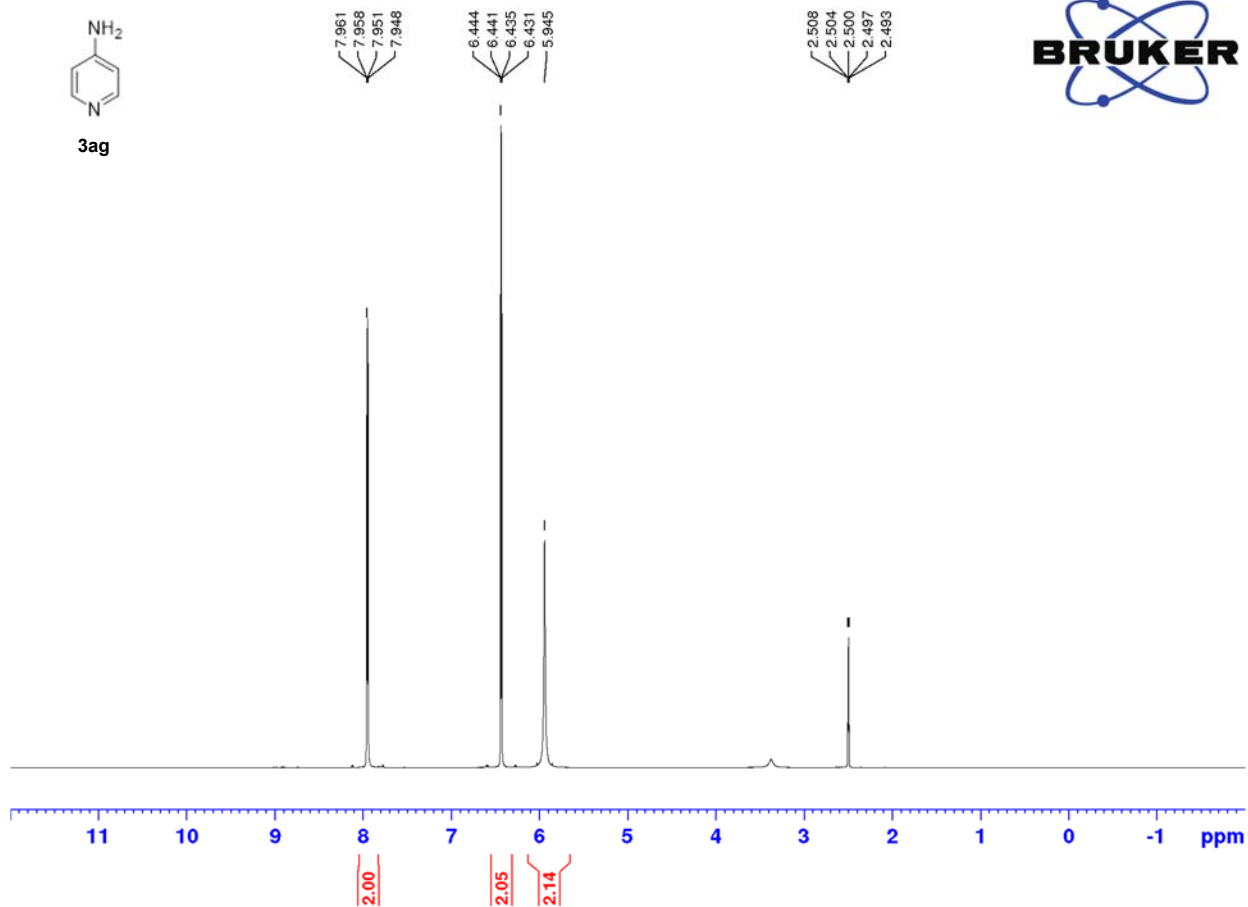

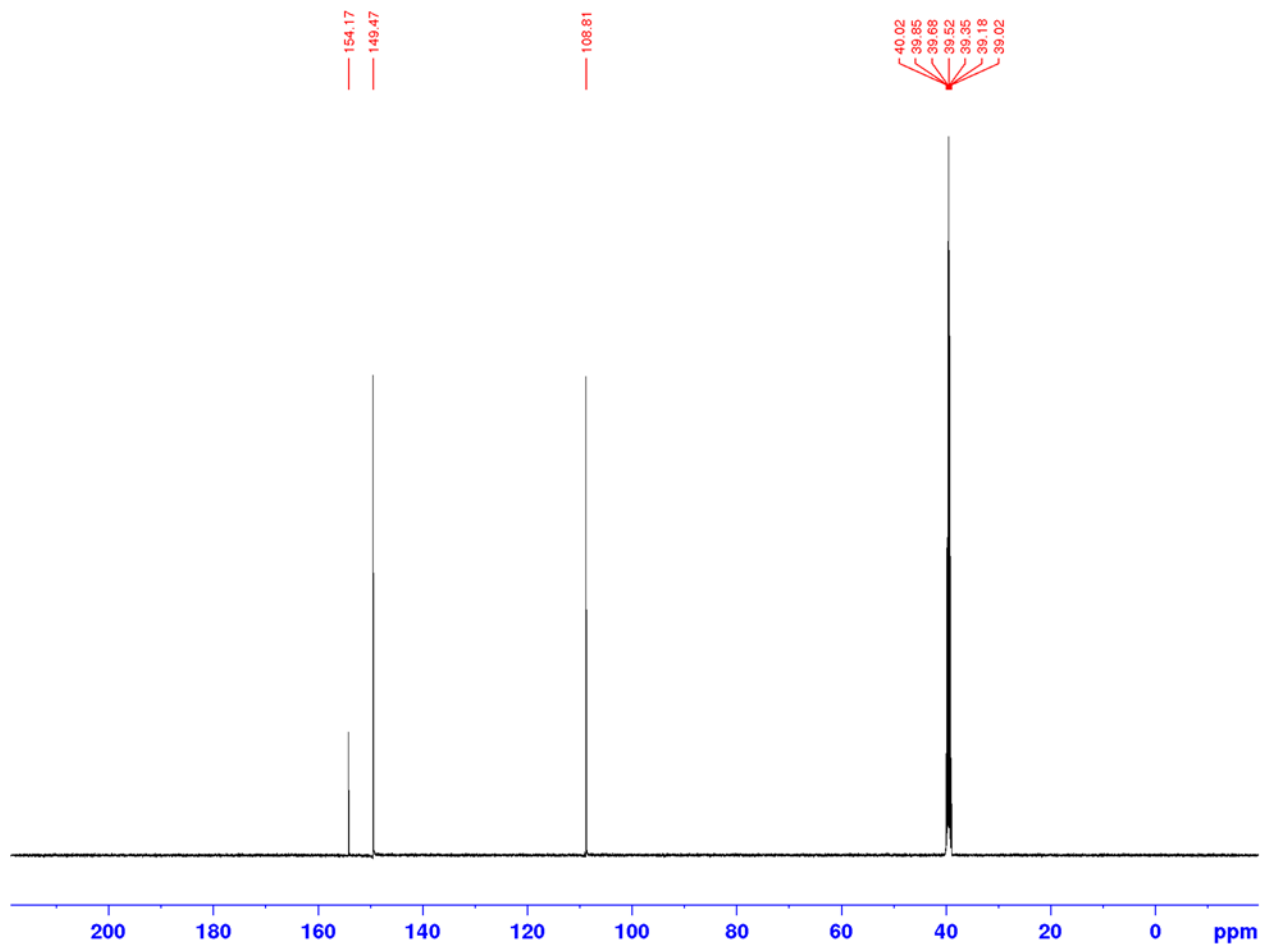

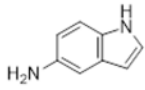

3ah

7.989  
7.260  
7.199  
7.182  
7.126  
7.121  
7.115  
6.959  
6.954  
6.684  
6.680  
6.667  
6.663  
6.387  
6.385  
6.383  
6.381  
6.379  
6.376  
6.375

3.390

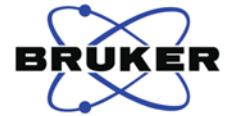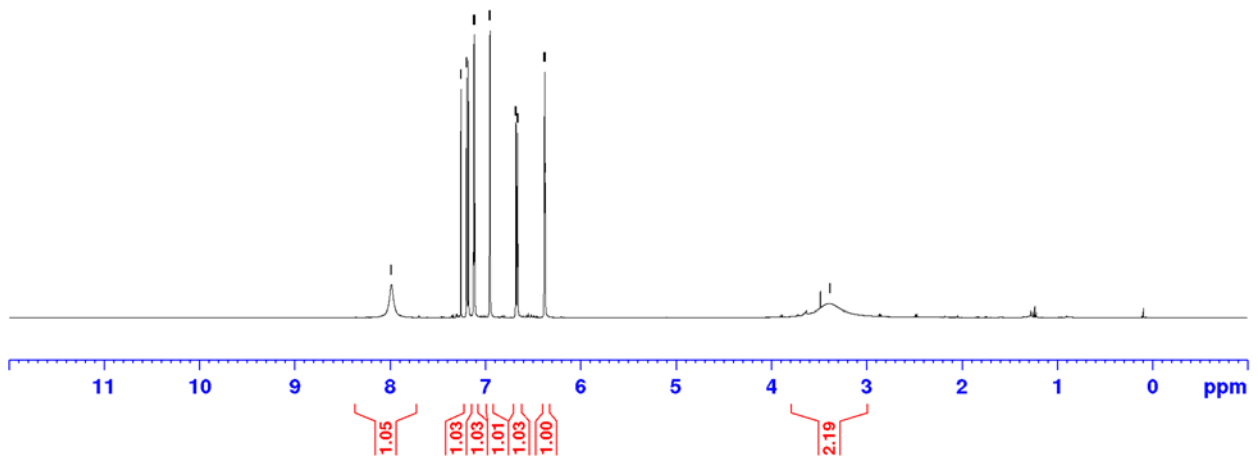



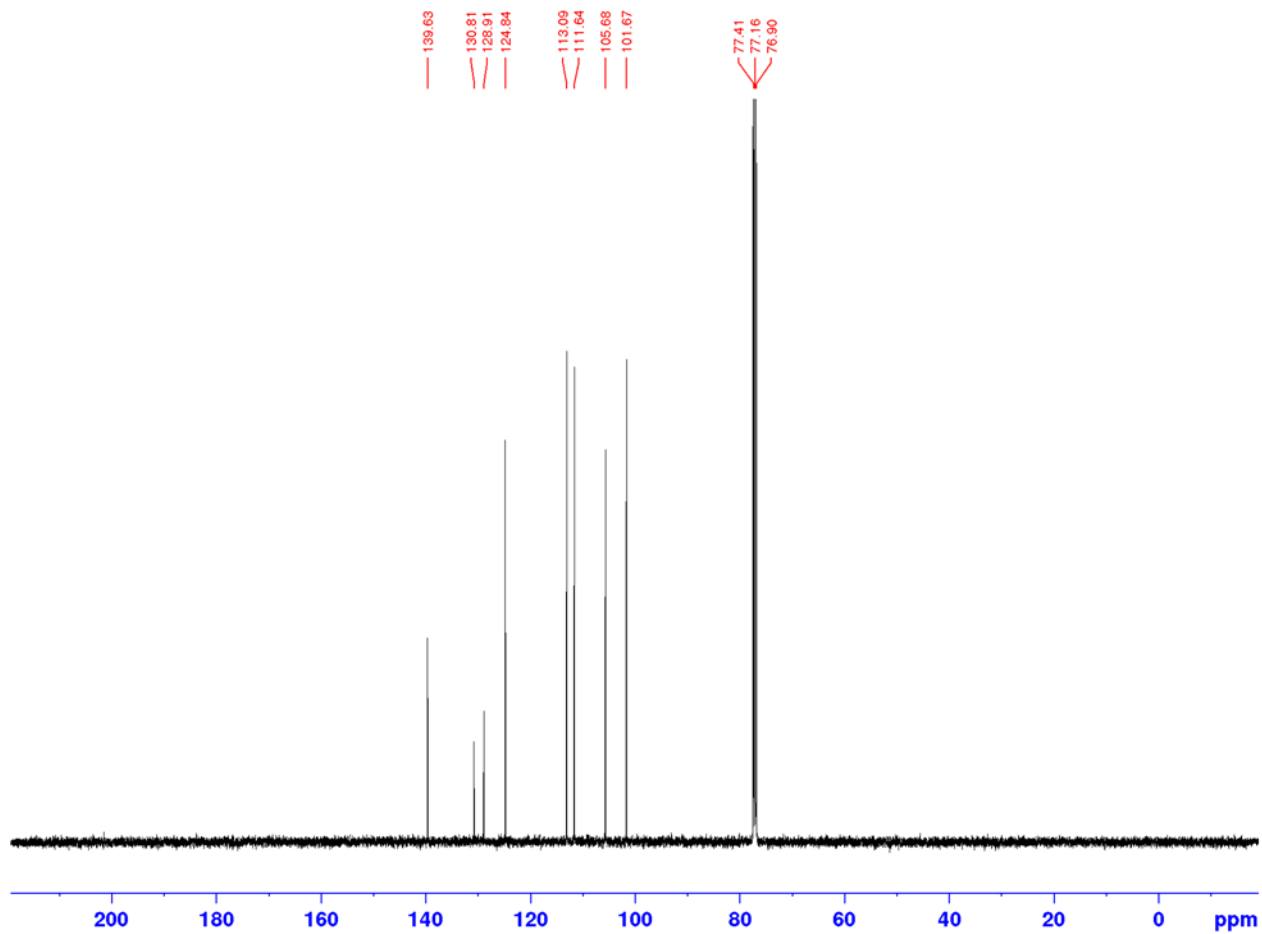

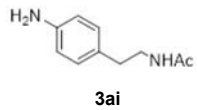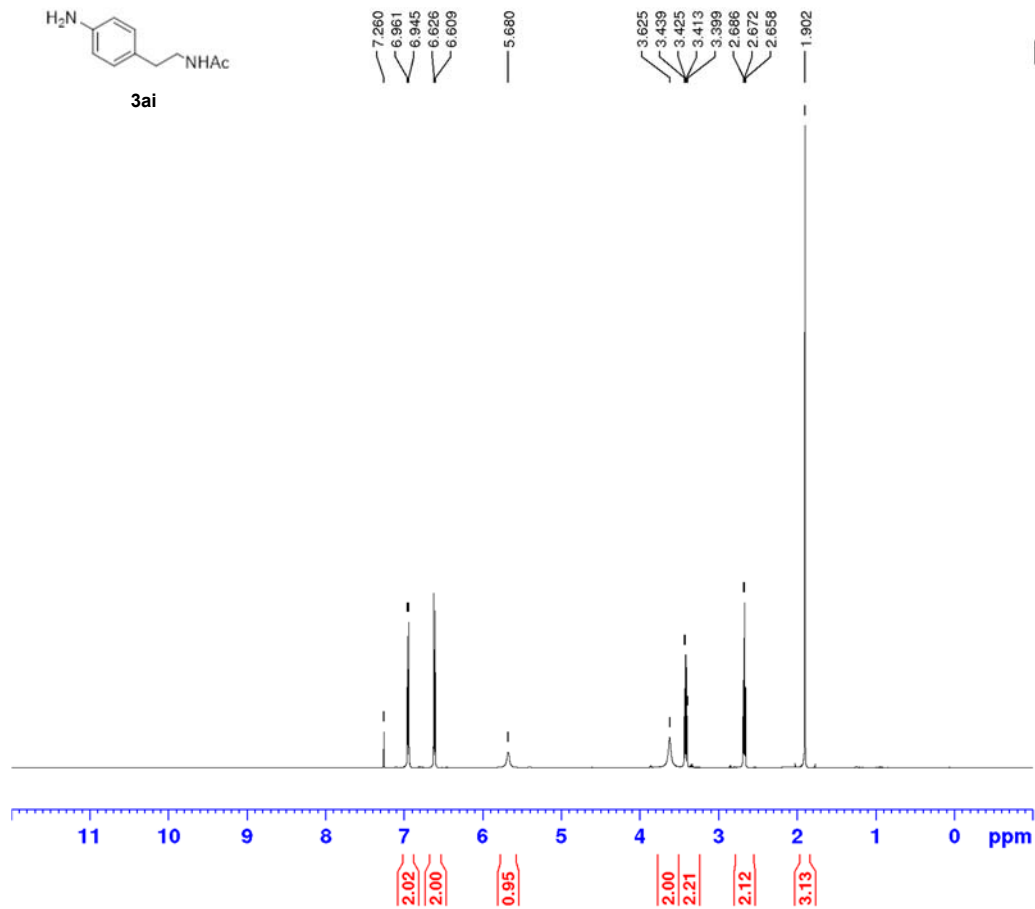

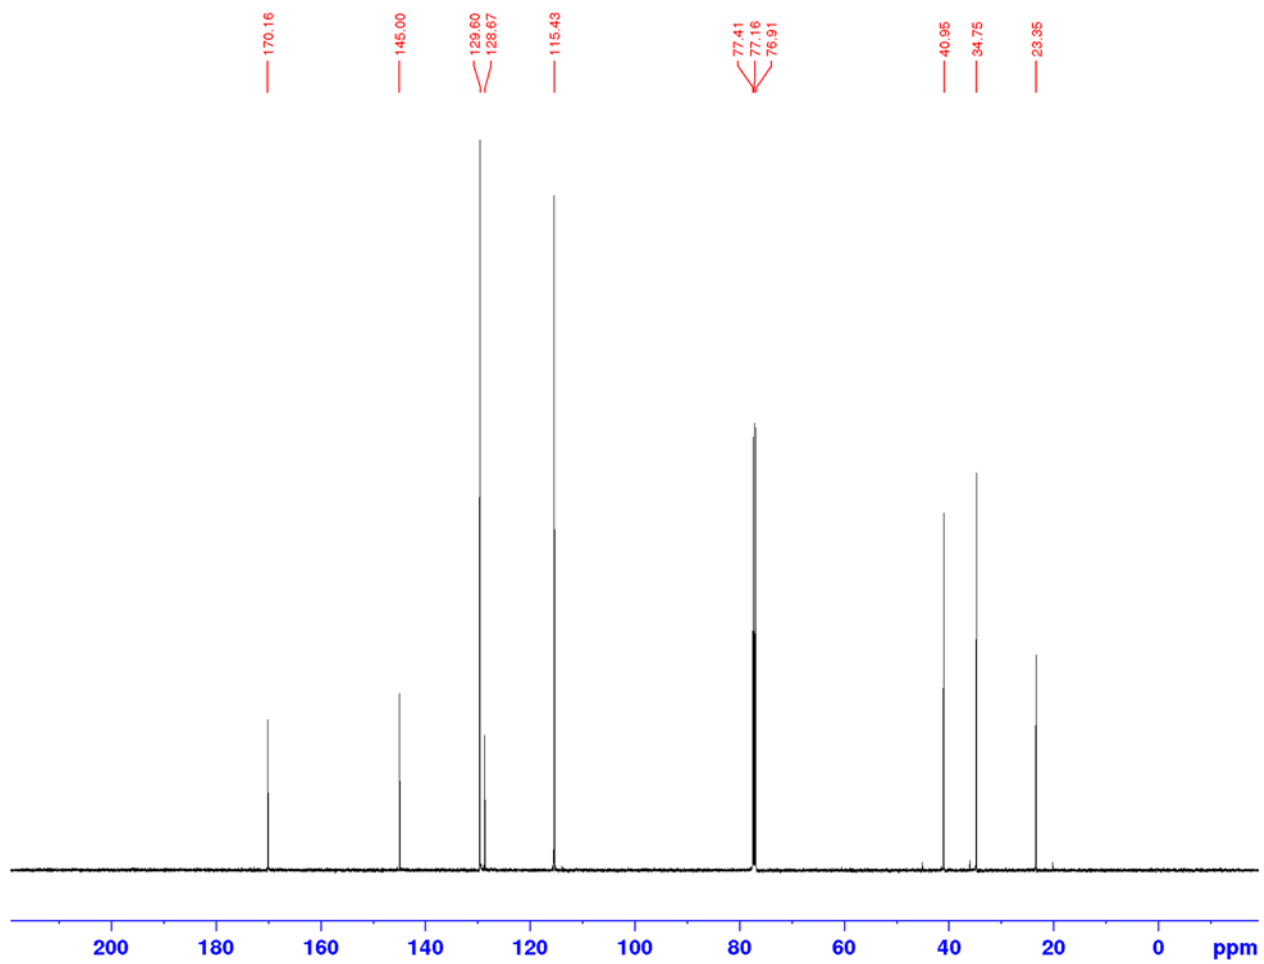

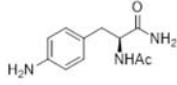

3aj

7.910  
7.893  
7.347  
6.875  
6.859  
6.447  
6.431

4.827  
4.300  
4.280  
4.287  
4.281  
4.277  
4.273  
4.268  
4.264  
4.258  
4.254  
2.802  
2.792  
2.774  
2.765  
2.566  
2.547  
2.539  
2.520  
2.500  
1.757

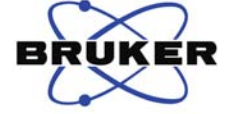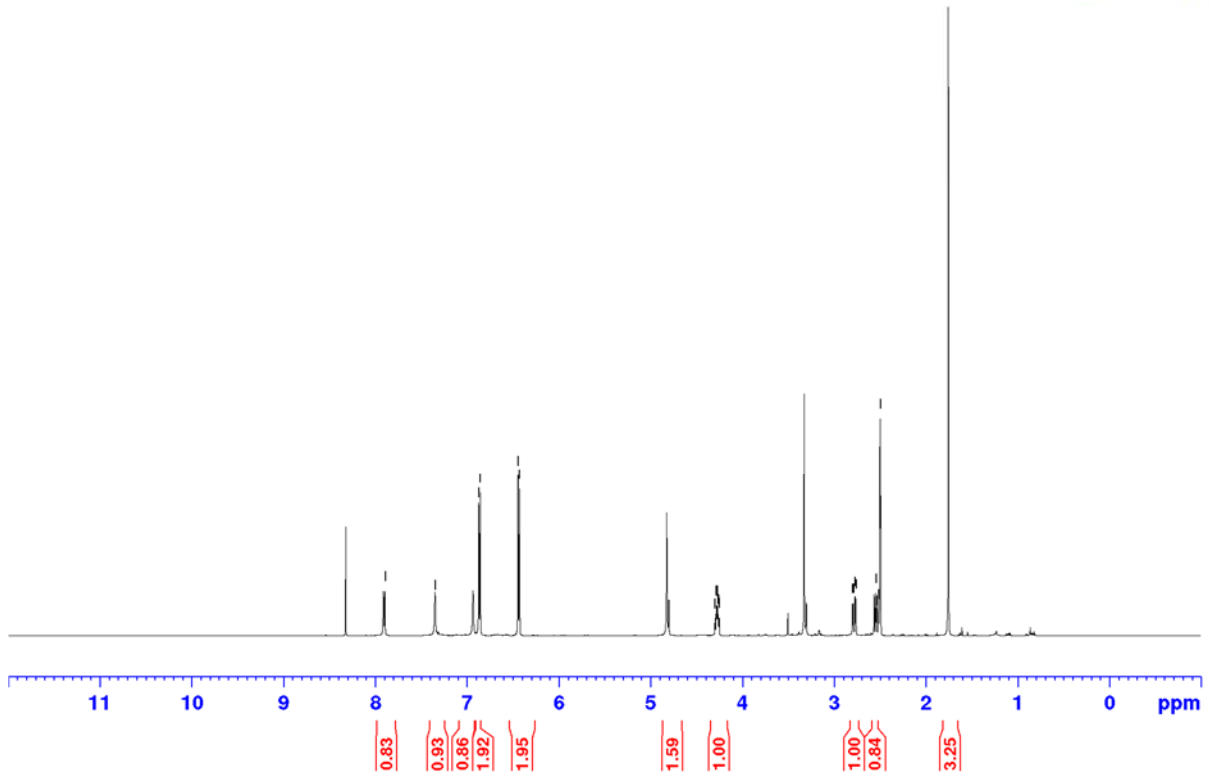

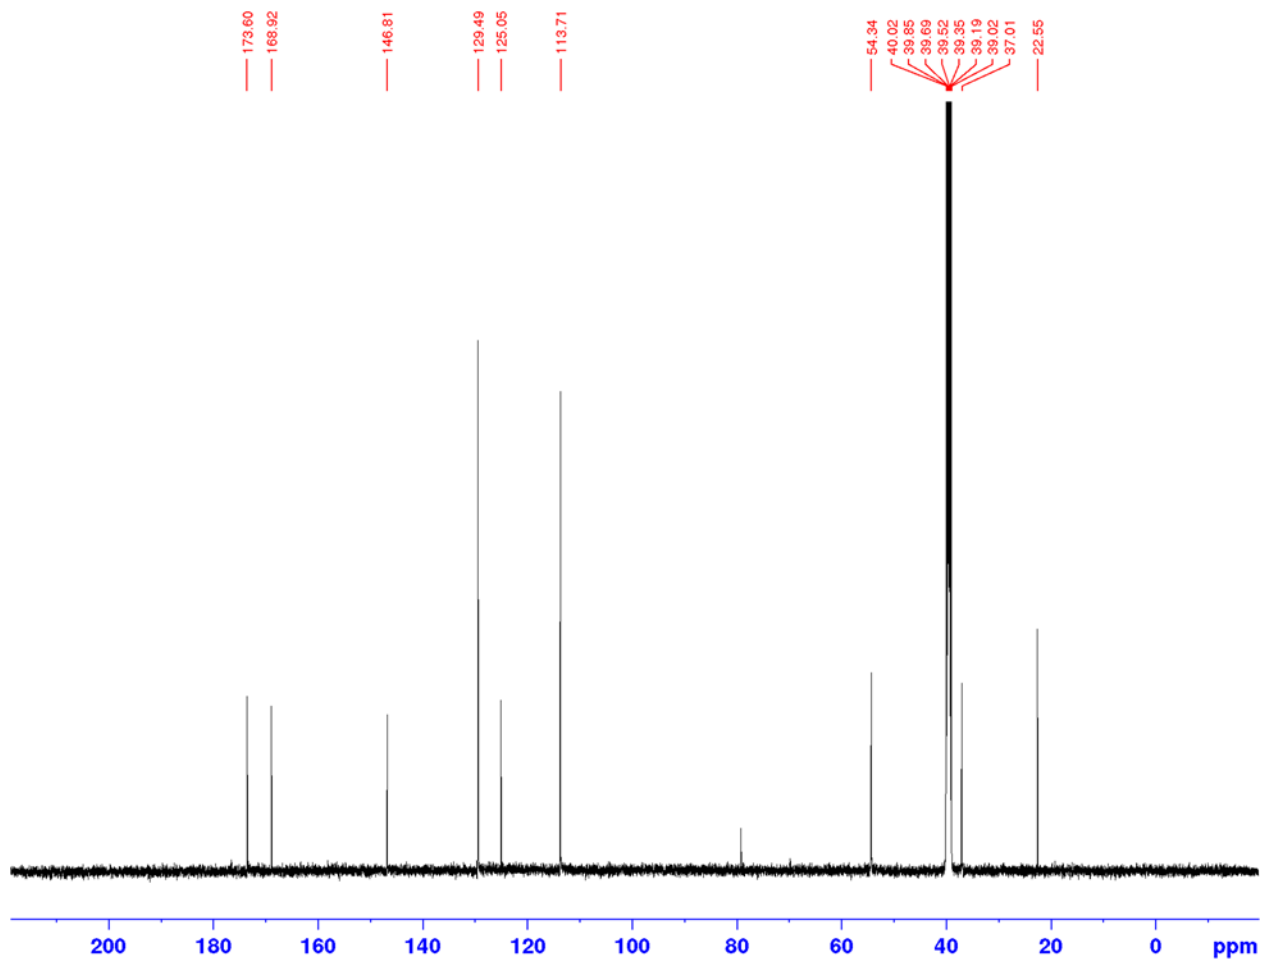

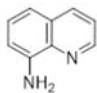

3ak

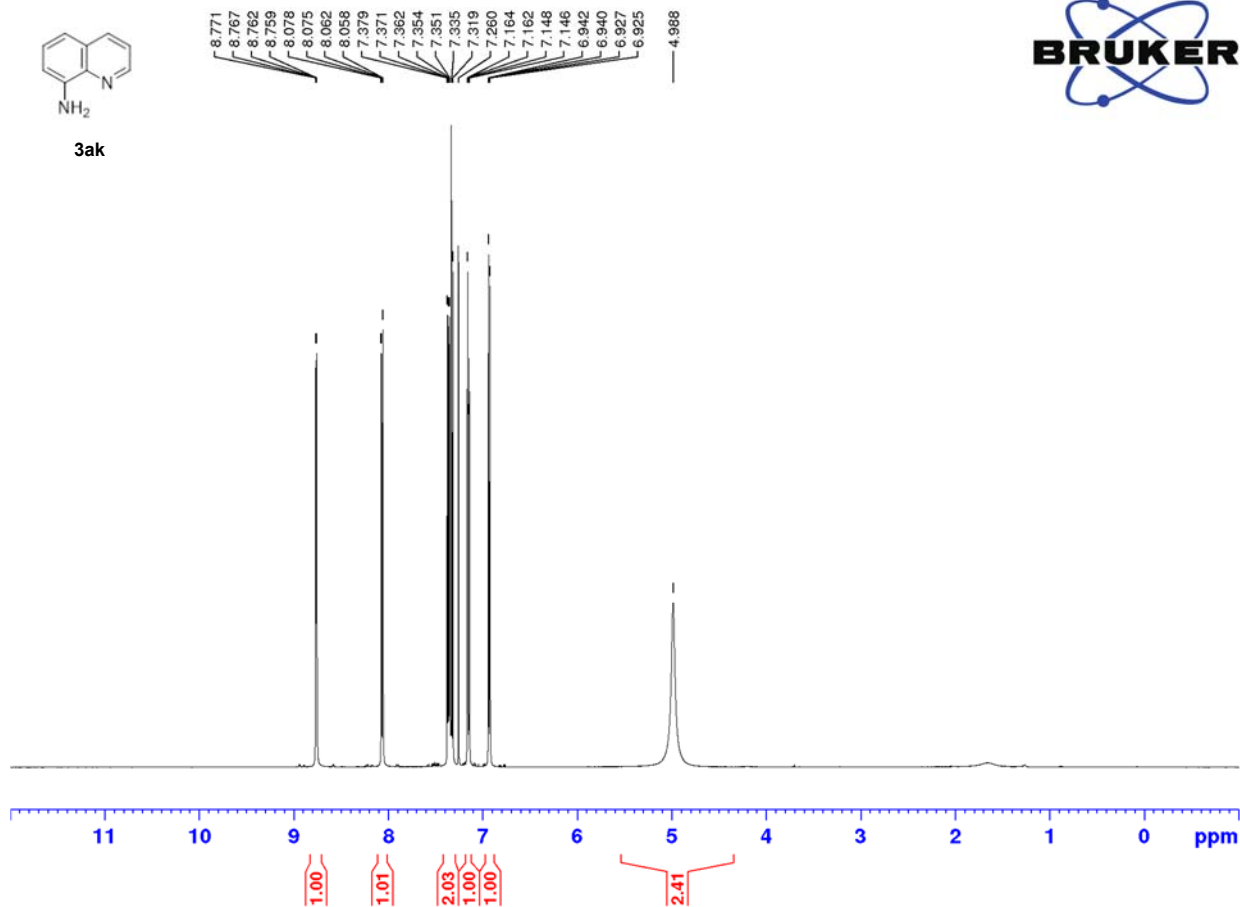

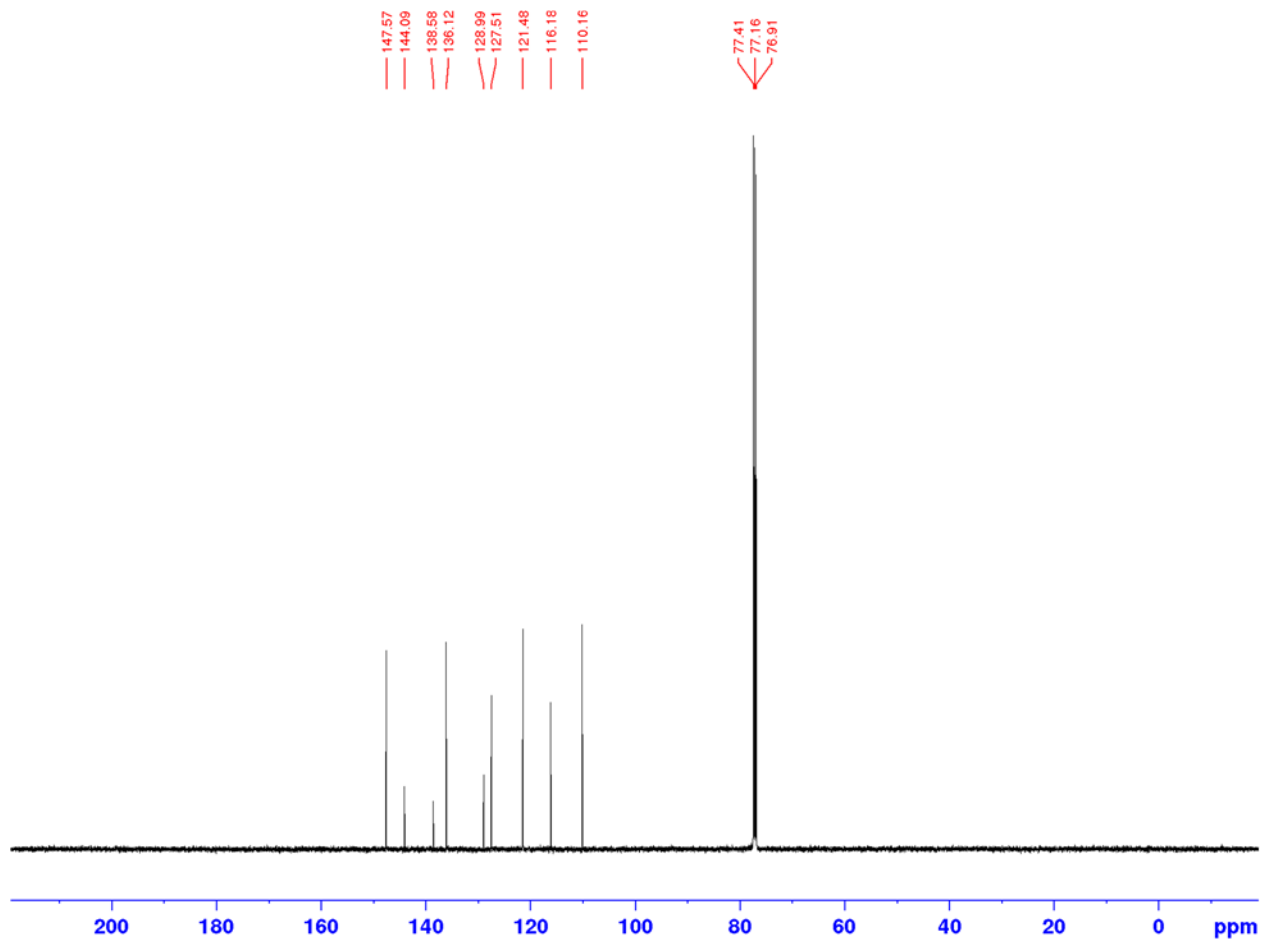

Supplement: c9sc00595a1.pdf [file c9sc00595a1.pdf]
